# Supplementary material
Source: HighWire-hosted journal article supplement (https://jitc.bmj.com/content/11/3/e006389)
Supplement: inline-supplementary-material-3 [file inline-supplementary-material-3.xlsx]

## Sheet: Raw data_PanCancerImmunePanel
Probe Name	Class Name	20190627_30102366630321-01_BX0177 002_02.RCC	20190627_30102366630321-01_BX0177 003_03.RCC	20190627_30102366630321-01_BX0177 007_07.RCC	20190627_30102366630321-01_BX0177 012_12.RCC	20190628_30102366640321-01_BX0177 013_01.RCC	20190628_30102366640321-01_BX0177 014_02.RCC	20190628_30102366640321-01_BX0177 015_03.RCC	20190627_30102366630321-01_BX0177 009_09.RCC	20190627_30102366630321-01_BX0177 010_10.RCC	20190627_30102366630321-01_BX0177 011_11.RCC	20190628_30102366640321-01_BX0177 020_08.RCC	20190628_30102366640321-01_BX0177 021_09.RCC	20190628_30102366640321-01_BX0177 022_10.RCC	20190628_30102366640321-01_BX0177 023_11.RCC	20190628_30102366640321-01_BX0177 024_12.RCC
		WT	WT	WT	WT	WT	WT	WT	KO	KO	KO	KO	KO	KO	KO	KO
A2m	Endogenous	20.71	31.23	13.82	23.84	29.26	14.52	15.9	30.95	52.21	31.68	11.73	19.83	11.12	8.69	15.36
Abca1	Endogenous	580.79	347.1	370.93	449.36	447.44	491.72	529.76	422.3	399.78	235.08	428.63	363.16	420.55	305.36	381.73
Abcb1a	Endogenous	43.91	30.03	34.18	27.41	44.74	32.91	38.76	33.94	56.69	23.51	18.13	43.38	26.86	26.08	30.71
Abcg1	Endogenous	242.76	749.45	333.11	259.84	314.93	202.3	276.31	195.68	190.94	186.02	224.98	307.38	172.3	229.29	195.25
Abl1	Endogenous	246.07	290.65	219.65	245.54	273.63	181.98	228.6	433.28	511.66	531.48	360.39	499.5	350.15	477.06	408.06
Ada	Endogenous	37.28	43.24	42.91	60.79	39.58	24.2	44.73	41.93	32.82	32.71	27.72	24.79	30.57	15.21	37.3
Adora2a	Endogenous	17.4	18.02	13.82	9.54	12.05	5.81	21.87	25.96	34.31	30.66	18.13	21.07	17.6	13.04	10.97
Aicda	Endogenous	21.54	37.23	15.27	22.65	20.65	18.39	14.91	23.96	47.74	29.64	6.4	18.59	17.6	14.13	15.36
Aire	Endogenous	33.14	42.04	29.82	35.76	30.98	24.2	19.88	32.95	47.74	33.73	29.85	29.75	15.75	30.43	17.55
Akt3	Endogenous	306.55	160.94	162.92	126.34	223.72	134.55	327	265.56	317.74	278	350.79	646.99	276.97	665.06	601.12
Alcam	Endogenous	193.87	153.73	216.01	250.3	254.7	344.59	161.02	305.49	277.46	160.47	294.28	173.52	342.74	264.07	298.36
Ambp	Endogenous	19.88	28.83	10.18	17.88	29.26	15.49	10.93	23.96	23.87	27.6	17.06	14.87	6.48	17.39	15.36
Amica1	Endogenous	65.45	114.1	42.18	64.36	89.49	53.24	71.56	48.92	58.18	64.39	66.11	48.34	38.91	55.42	43.88
Angpt1	Endogenous	23.2	18.02	18.91	29.8	32.7	15.49	17.89	26.96	29.83	26.57	13.86	19.83	23.16	9.78	19.74
Angpt2	Endogenous	160.73	134.52	156.37	103.7	148	47.43	206.74	220.63	444.53	386.34	161	446.2	171.37	311.88	311.53
Anp32b	Endogenous	1212.12	1162.61	1552.11	1319.46	1712.33	1406.45	1255.33	1782.05	1945.21	2113.65	2128.23	2320.24	2032.35	2435.3	2573.39
Anxa1	Endogenous	2376.18	4150.8	3762.44	3350.51	2858.47	3351.08	3302.83	2140.45	1506.64	1846.89	2437.44	1657.13	1899.89	1986.49	2380.33
Apoe	Endogenous	9740.03	9198.79	9346.82	10576	9943.57	10082.3	11627	8634.69	7372.11	6345.03	8312.45	5063.12	6273.98	6200.73	7450.32
App	Endogenous	3233.7	2950.96	2937.66	2861.82	3496.94	2553.48	4031.38	3741.8	4309.59	3753.05	2817.02	2900.29	2270.42	2621.13	2593.13
Arg1	Endogenous	178.96	239.01	288.02	259.84	86.05	118.09	644.07	96.84	37.29	77.68	97.03	33.46	68.55	61.94	87.75
Arg2	Endogenous	19.88	25.22	27.64	20.26	30.98	46.46	26.84	31.95	22.38	21.46	23.46	8.68	20.38	14.13	2.19
Atf1	Endogenous	124.28	102.09	97.46	126.34	139.4	92.92	138.16	108.82	116.35	118.56	114.09	143.78	143.58	179.31	142.6
Atf2	Endogenous	186.42	245.01	206.56	205.01	196.19	166.49	172.94	249.59	268.51	249.39	237.77	321.02	245.48	321.66	315.91
Atg10	Endogenous	91.14	106.89	60.37	81.05	80.88	58.08	81.5	86.86	79.06	69.5	77.84	115.27	88	113.02	111.89
Atg12	Endogenous	154.1	272.64	167.28	183.56	168.65	154.87	172.94	169.72	210.33	200.33	194.06	275.16	177.85	247.77	210.61
Atg16l1	Endogenous	160.73	156.14	114.19	131.11	117.02	134.55	156.05	121.8	138.73	112.43	243.1	194.59	238.99	196.69	190.87
Atg5	Endogenous	69.6	75.67	56.73	59.6	60.23	63.89	60.63	62.9	82.04	47.02	68.24	58.25	72.25	60.86	65.82
Atg7	Endogenous	82.85	56.45	64.73	87.01	87.77	79.37	84.48	95.84	80.55	78.7	104.49	101.63	105.6	80.42	68.01
Atm	Endogenous	116.82	105.69	96.01	95.35	129.07	99.7	93.43	114.81	125.3	131.85	123.68	149.97	149.14	139.1	142.6
Axl	Endogenous	705.07	1305.53	819.69	599.54	650.51	410.42	627.17	748.76	778.68	818.68	543.79	618.48	508.55	559.65	491.42
Batf	Endogenous	30.66	55.25	32	45.29	32.7	16.46	41.75	34.94	20.88	32.71	30.92	24.79	36.13	32.6	43.88
Bax	Endogenous	150.79	111.7	110.55	139.46	139.4	110.35	175.93	151.75	234.2	192.15	202.59	205.75	193.6	185.83	175.51
Bcl10	Endogenous	263.47	414.36	296.02	294.41	271.91	213.92	315.08	212.65	190.94	195.22	203.65	236.73	236.21	234.73	254.49
Bcl2	Endogenous	87.82	148.93	93.82	61.98	91.21	60.98	70.57	88.85	123.81	106.3	117.29	178.48	106.53	151.05	114.08
Bcl2l1	Endogenous	280.87	201.78	225.47	214.55	268.47	168.43	334.95	231.62	293.87	263.69	336.93	349.52	322.36	458.59	285.2
Bcl6	Endogenous	120.13	109.29	64.73	108.47	134.23	103.57	87.47	80.87	71.6	53.15	67.17	68.17	58.36	53.25	46.07
Bid	Endogenous	54.68	64.86	41.46	47.68	44.74	42.59	63.61	43.93	40.28	25.55	50.11	32.23	28.72	38.03	46.07
Birc5	Endogenous	96.11	98.49	101.1	90.59	120.47	95.83	84.48	104.83	128.29	131.85	104.49	90.48	150.99	133.66	138.21
Blk	Endogenous	9.11	18.02	7.27	9.54	17.21	11.62	3.98	10.98	10.44	13.29	12.79	6.2	6.48	3.26	4.39
Blnk	Endogenous	92.79	54.05	83.64	137.07	89.49	142.29	110.33	71.88	32.82	53.15	78.9	49.58	71.33	43.47	57.04
Bmi1	Endogenous	117.65	301.46	149.83	108.47	117.02	84.21	111.32	123.79	144.7	134.91	125.82	218.14	135.24	188	236.94
Bst1	Endogenous	28.17	26.42	22.55	30.99	32.7	30.01	60.63	13.98	17.9	22.49	24.52	23.55	24.08	16.3	24.13
Bst2	Endogenous	213.76	303.86	212.38	277.72	277.07	211.98	421.43	273.55	281.94	270.85	264.43	225.58	256.59	387.95	333.47
Btk	Endogenous	88.65	121.31	56	77.48	99.81	45.49	64.61	62.9	98.45	80.74	60.78	73.13	54.65	88.02	61.43
Btla	Endogenous	27.34	40.84	21.82	26.22	27.53	11.62	20.87	30.95	14.92	30.66	11.73	28.51	19.45	17.39	13.16
C1qa	Endogenous	1059.67	548.88	501.85	892.75	776.14	516.89	1058.53	922.47	793.6	976.08	730.38	773.41	1014.32	670.5	807.34
C1qb	Endogenous	833.49	463.6	464.03	890.37	588.56	511.08	1051.58	789.69	636.97	846.28	644.01	570.14	737.35	603.12	684.48
C1qbp	Endogenous	502.91	517.65	646.59	675.82	602.33	724.04	570.52	431.29	404.26	383.28	485.14	395.38	555.79	478.15	519.94
C1ra	Endogenous	328.92	283.45	255.29	213.35	235.77	210.05	491.99	332.45	325.2	280.05	178.06	177.24	234.36	167.35	114.08
C1s1	Endogenous	599.85	855.14	657.5	582.85	512.84	318.46	1139.04	628.96	1021.83	681.72	464.88	684.17	629.9	694.4	669.12
C2	Endogenous	159.9	112.9	164.37	163.29	175.54	156.81	360.8	191.68	213.32	141.05	246.3	95.44	125.98	249.94	221.58
C3	Endogenous	147.48	128.51	117.83	289.64	323.54	378.47	254.45	278.54	95.47	97.1	190.86	272.68	146.36	57.6	70.2
C3ar1	Endogenous	229.5	503.24	239.29	277.72	244.37	152.94	225.62	222.63	252.1	346.48	256.97	262.76	245.48	232.55	326.88
C4b	Endogenous	1009.96	1255.09	997.16	913.02	770.98	590.46	1916.29	1644.28	1837.81	2057.43	1337.07	2363.62	913.35	2179.93	1937.17
C5ar1	Endogenous	223.7	134.52	73.46	170.45	103.26	75.5	168.97	159.74	140.22	209.53	126.88	115.27	180.63	92.37	114.08
C6	Endogenous	48.05	51.64	27.64	50.06	56.79	29.04	48.7	32.95	40.28	42.93	34.12	24.79	34.27	18.47	19.74
C7	Endogenous	96.11	21.62	8	14.3	165.21	14.52	12.92	15.97	16.41	22.49	9.6	50.82	27.79	7.61	17.55
C8a	Endogenous	7.46	12.01	12.36	7.15	15.49	6.78	7.95	7.99	13.43	14.31	8.53	2.48	6.48	8.69	2.19
C8b	Endogenous	53.02	69.66	53.82	41.72	49.91	22.26	50.69	46.92	77.57	58.26	19.19	40.9	36.13	30.43	39.49
C8g	Endogenous	19.88	20.42	11.64	25.03	34.42	10.65	15.9	21.96	29.83	16.35	19.19	21.07	11.12	9.78	21.94
C9	Endogenous	26.51	31.23	20.37	28.61	32.7	21.3	15.9	30.95	40.28	28.62	13.86	14.87	8.34	27.17	21.94
CD209e	Endogenous	62.14	56.45	28.37	25.03	106.7	32.91	27.83	14.98	17.9	19.42	11.73	12.39	27.79	9.78	2.19
Camp	Endogenous	10.77	18.02	8	19.07	24.09	12.58	13.92	19.97	17.9	12.26	9.6	17.35	12.04	7.61	26.33
Card11	Endogenous	19.06	27.62	24.73	22.65	25.81	17.42	31.81	22.96	28.34	38.84	31.99	33.46	24.08	39.12	43.88
Card9	Endogenous	12.43	24.02	8.73	28.61	13.77	3.87	10.93	16.97	22.38	16.35	13.86	22.31	17.6	8.69	10.97
Casp1	Endogenous	159.9	174.15	165.1	212.16	125.63	141.32	253.45	154.74	113.37	85.85	178.06	161.13	135.24	192.35	250.1
Casp3	Endogenous	176.47	181.36	206.56	202.63	206.51	158.75	218.66	198.67	220.78	200.33	185.53	208.23	172.3	214.08	175.51
Casp8	Endogenous	217.9	275.04	192.01	187.13	177.26	152.94	202.76	178.7	167.07	195.22	245.24	236.73	200.09	237.99	245.71
Ccl1	Endogenous	63.8	84.07	116.37	157.33	118.74	59.05	116.29	24.96	26.85	17.38	123.68	17.35	26.86	31.51	162.34
Ccl11	Endogenous	669.44	1832.79	847.33	451.74	1037.72	227.47	1228.5	829.63	1809.46	1742.64	762.37	2560.69	512.26	1614.84	1770.44
Ccl12	Endogenous	62.97	37.23	21.09	52.44	17.21	17.42	109.33	40.93	35.8	53.15	29.85	37.18	75.03	103.24	68.01
Ccl17	Endogenous	163.22	117.7	126.55	171.64	132.51	29.04	86.47	34.94	19.39	42.93	66.11	29.75	50.02	23.91	83.37
Ccl19	Endogenous	116.82	163.34	89.46	89.39	187.58	184.88	74.54	47.92	19.39	33.73	59.71	28.51	115.79	28.25	32.91
Ccl2	Endogenous	299.09	229.4	137.46	135.88	134.23	115.19	543.68	216.64	234.2	350.57	336.93	356.96	301.05	590.08	348.82
Ccl20	Endogenous	57.17	61.25	57.46	71.52	60.23	56.14	40.75	38.94	41.77	27.6	26.66	17.35	19.45	22.82	30.71
Ccl21a	Endogenous	332.23	1824.38	892.42	612.65	1211.54	1510.99	1114.19	878.54	219.28	155.36	858.33	105.35	403.88	493.36	555.04
Ccl22	Endogenous	204.64	135.72	96.73	165.68	237.49	121	137.16	53.91	40.28	48.04	92.76	32.23	50.95	58.68	72.4
Ccl24	Endogenous	71.25	39.63	43.64	100.12	44.74	50.33	145.11	46.92	38.78	59.28	79.97	50.82	57.43	44.55	107.5
Ccl25	Endogenous	24.03	42.04	31.27	34.57	32.7	9.68	26.84	32.95	38.78	49.06	47.98	61.97	32.42	45.64	41.68
Ccl26	Endogenous	18.23	16.81	6.55	13.11	8.6	8.71	13.92	14.98	17.9	15.33	12.79	12.39	6.48	13.04	6.58
Ccl27a	Endogenous	348.8	606.53	639.32	697.28	509.4	671.77	398.57	130.78	23.87	20.44	586.44	81.8	184.34	148.88	469.48
Ccl28	Endogenous	19.06	26.42	14.55	11.92	15.49	8.71	20.87	23.96	19.39	16.35	5.33	14.87	8.34	7.61	10.97
Ccl3	Endogenous	53.02	61.25	20.37	20.26	34.42	23.23	29.82	28.95	53.7	47.02	40.52	47.1	64.84	40.21	94.34
Ccl4	Endogenous	20.71	20.42	13.09	11.92	13.77	8.71	19.88	11.98	17.9	11.24	20.26	6.2	10.19	8.69	6.58
Ccl5	Endogenous	33.14	31.23	20.37	29.8	32.7	17.42	72.56	18.97	25.36	16.35	13.86	24.79	10.19	11.95	17.55
Ccl6	Endogenous	187.24	196.97	84.37	160.91	132.51	69.69	353.84	131.78	70.11	128.78	204.72	157.41	134.32	146.7	105.3
Ccl7	Endogenous	68.77	79.27	34.91	89.39	94.65	48.4	132.19	67.89	73.09	68.48	93.83	61.97	86.15	114.1	96.53
Ccl8	Endogenous	2022.41	2245.95	1200.08	2149.04	1640.05	961.19	2546.45	744.77	366.96	881.03	624.82	520.57	1554.37	727	1085.96
Ccl9	Endogenous	855.03	667.78	453.12	756.87	820.89	474.3	1058.53	558.08	475.86	660.26	923.37	1270.43	947.63	665.06	811.72
Ccnd3	Endogenous	443.26	303.86	293.11	233.62	223.72	167.46	542.69	472.22	490.78	486.51	299.62	425.13	295.5	449.9	388.31
Ccr1	Endogenous	99.42	207.78	79.28	73.9	51.63	39.69	122.25	88.85	108.9	113.45	72.5	131.38	80.59	135.84	133.82
Ccr2	Endogenous	410.12	523.65	296.75	441.01	516.28	262.32	377.69	304.5	217.79	436.43	376.38	503.21	471.5	376	397.09
Ccr3	Endogenous	21.54	18.02	16.73	17.88	30.98	6.78	38.76	22.96	49.23	42.93	21.32	33.46	14.82	41.29	46.07
Ccr4	Endogenous	35.63	36.03	29.82	53.64	22.37	35.81	33.79	10.98	20.88	27.6	25.59	17.35	17.6	11.95	21.94
Ccr5	Endogenous	53.02	44.44	29.82	44.1	39.58	24.2	59.64	43.93	35.8	51.1	50.11	34.7	50.02	31.51	37.3
Ccr6	Endogenous	19.88	32.43	18.91	26.22	25.81	11.62	16.9	16.97	20.88	18.4	20.26	9.92	11.12	7.61	8.78
Ccr7	Endogenous	40.6	64.86	37.09	63.17	34.42	28.07	57.65	38.94	43.26	38.84	26.66	27.27	12.97	22.82	21.94
Ccr8	Endogenous	25.68	50.44	24	30.99	34.42	24.2	19.88	36.94	41.77	33.73	13.86	19.83	13.89	21.73	17.55
Ccr9	Endogenous	29.83	50.44	23.27	36.95	27.53	19.36	35.78	16.97	35.8	21.46	17.06	14.87	18.53	22.82	10.97
Ccrl2	Endogenous	35.63	33.63	19.64	26.22	24.09	23.23	27.83	29.95	29.83	25.55	29.85	30.99	25.01	26.08	26.33
Cd14	Endogenous	70.42	70.86	48	50.06	67.12	34.85	92.44	56.91	71.6	87.9	51.18	58.25	35.2	43.47	57.04
Cd160	Endogenous	33.14	49.24	29.09	48.87	27.53	19.36	19.88	30.95	53.7	45.99	9.6	30.99	18.53	13.04	19.74
Cd163	Endogenous	233.64	115.3	80.01	199.05	196.19	149.07	75.54	109.82	67.13	68.48	77.84	117.75	125.98	31.51	65.82
Cd164	Endogenous	1003.33	1048.51	866.97	895.14	1096.24	979.58	985.98	858.58	750.34	735.89	690.93	705.24	811.46	654.2	767.85
Cd180	Endogenous	69.6	110.5	72	101.31	61.95	50.33	98.4	82.86	85.03	83.81	89.56	95.44	88.93	78.24	98.72
Cd19	Endogenous	9.11	18.02	11.64	16.69	27.53	15.49	13.92	14.98	17.9	16.35	6.4	16.11	13.89	15.21	4.39
Cd1d1	Endogenous	62.97	58.85	42.91	100.12	86.05	85.18	68.58	45.92	32.82	45.99	75.7	59.49	70.4	54.34	65.82
Cd1d2	Endogenous	31.48	46.84	24.73	42.91	32.7	22.26	12.92	22.96	59.67	28.62	18.13	26.03	21.31	18.47	28.52
Cd2	Endogenous	22.37	40.84	17.46	9.54	18.93	8.71	14.91	20.97	26.85	25.55	21.32	27.27	14.82	13.04	8.78
Cd200	Endogenous	533.56	757.86	513.49	355.19	397.54	265.22	842.85	691.85	726.47	688.88	475.55	898.6	344.59	695.49	866.57
Cd200r1	Endogenous	53.85	109.29	36.37	77.48	39.58	34.85	59.64	42.93	32.82	29.64	54.38	65.69	53.73	30.43	46.07
Cd207	Endogenous	80.37	135.72	90.19	135.88	127.35	120.03	77.53	18.97	20.88	23.51	54.38	18.59	26.86	13.04	32.91
Cd22	Endogenous	17.4	32.43	12.36	17.88	17.21	12.58	21.87	22.96	35.8	24.53	21.32	9.92	10.19	21.73	15.36
Cd244	Endogenous	68.77	111.7	56	75.09	80.88	49.37	55.66	45.92	62.65	58.26	65.04	47.1	49.1	54.34	52.65
Cd247	Endogenous	39.77	62.45	37.82	47.68	37.86	38.72	42.74	45.92	55.19	40.88	35.19	28.51	20.38	22.82	24.13
Cd27	Endogenous	19.06	24.02	12.36	15.5	20.65	7.74	10.93	12.98	23.87	24.53	10.66	13.63	3.71	10.87	17.55
Cd274	Endogenous	72.91	63.66	45.09	70.32	86.05	40.65	166.98	45.92	53.7	38.84	91.7	114.03	61.14	98.89	103.11
Cd276	Endogenous	162.39	74.46	101.1	125.15	163.49	96.8	136.17	216.64	168.56	234.05	146.08	213.18	132.46	139.1	195.25
Cd28	Endogenous	29	45.64	19.64	33.37	22.37	18.39	22.86	37.94	53.7	34.75	14.93	26.03	14.82	19.56	10.97
Cd33	Endogenous	53.85	62.45	36.37	47.68	30.98	27.1	41.75	54.91	74.59	65.41	47.98	76.85	67.62	55.42	43.88
Cd34	Endogenous	850.06	299.06	440.76	501.8	1075.58	791.79	1263.28	859.58	790.61	840.14	607.76	770.93	477.06	692.23	636.22
Cd36	Endogenous	380.29	112.9	118.55	407.64	511.12	545.93	229.6	304.5	243.15	217.7	203.65	159.89	282.53	145.62	258.87
Cd37	Endogenous	101.91	88.88	58.91	103.7	98.09	69.69	117.28	95.84	89.5	90.96	100.23	90.48	100.97	67.38	61.43
Cd38	Endogenous	188.9	433.58	191.29	165.68	204.79	77.44	236.56	148.75	292.38	307.64	116.22	650.71	124.13	239.07	285.2
Cd3d	Endogenous	62.97	91.28	29.09	85.82	41.3	30.97	58.64	38.94	28.34	37.82	38.38	29.75	24.08	21.73	35.1
Cd3e	Endogenous	42.25	68.46	29.82	48.87	55.07	48.4	42.74	23.96	47.74	35.77	36.25	14.87	16.67	18.47	28.52
Cd3eap	Endogenous	66.28	85.27	61.1	70.32	86.05	76.47	58.64	50.92	91	56.21	74.64	65.69	69.47	56.51	85.56
Cd3g	Endogenous	55.51	43.24	32	53.64	58.51	45.49	62.62	22.96	19.39	17.38	47.98	13.63	20.38	10.87	21.94
Cd4	Endogenous	24.03	38.43	20.37	26.22	46.47	24.2	62.62	30.95	19.39	30.66	28.79	14.87	31.49	26.08	37.3
Cd40	Endogenous	29	32.43	20.37	35.76	32.7	17.42	28.82	26.96	32.82	30.66	23.46	13.63	24.08	20.65	19.74
Cd40lg	Endogenous	37.28	34.83	16	23.84	15.49	14.52	26.84	24.96	49.23	38.84	14.93	17.35	8.34	13.04	28.52
Cd44	Endogenous	31.48	36.03	37.82	26.22	34.42	37.75	25.84	41.93	29.83	36.79	39.45	30.99	50.95	36.95	37.3
Cd46	Endogenous	12.43	19.22	8.73	8.34	10.33	1.94	9.94	9.98	17.9	14.31	8.53	8.68	6.48	7.61	13.16
Cd47	Endogenous	741.52	672.58	586.95	696.09	698.7	611.75	991.94	577.04	514.65	546.81	597.1	459.83	583.58	490.1	596.73
Cd48	Endogenous	158.25	120.1	82.19	122.77	148	111.32	158.03	112.81	82.04	99.14	113.02	94.2	131.54	86.94	114.08
Cd5	Endogenous	21.54	27.62	22.55	33.37	17.21	13.55	41.75	14.98	13.43	19.42	17.06	12.39	12.97	6.52	4.39
Cd53	Endogenous	29	45.64	32	40.53	44.74	21.3	27.83	44.93	41.77	38.84	14.93	32.23	22.23	22.82	21.94
Cd55	Endogenous	95.28	75.67	42.91	79.86	108.42	139.39	59.64	85.86	56.69	41.91	60.78	69.41	84.3	34.77	30.71
Cd59b	Endogenous	32.31	38.43	27.64	59.6	25.81	30.01	23.85	33.94	68.62	34.75	21.32	40.9	23.16	43.47	52.65
Cd6	Endogenous	17.4	36.03	19.64	27.41	17.21	8.71	29.82	11.98	26.85	13.29	14.93	7.44	10.19	8.69	8.78
Cd63	Endogenous	2031.52	3195.98	2489.63	2181.23	2796.52	2556.39	3274	2459.92	2215.21	2179.06	2259.37	1619.95	1894.33	2175.58	2895.88
Cd68	Endogenous	371.17	259.43	199.29	393.34	345.91	305.88	493.98	304.5	265.53	319.91	335.87	297.47	357.56	261.9	307.14
Cd69	Endogenous	21.54	36.03	14.55	19.07	24.09	18.39	13.92	14.98	11.93	20.44	15.99	9.92	7.41	14.13	8.78
Cd7	Endogenous	32.31	44.44	30.55	30.99	53.35	45.49	44.73	26.96	16.41	22.49	39.45	18.59	27.79	6.52	24.13
Cd70	Endogenous	24.86	49.24	30.55	32.18	22.37	16.46	19.88	22.96	52.21	36.79	12.79	21.07	17.6	17.39	26.33
Cd74	Endogenous	5143.42	3752.06	3601.7	6168.22	8124.54	4792.38	6961.48	3341.46	2176.43	3290.05	3794.77	2300.4	3372.74	2423.35	2687.47
Cd79a	Endogenous	11.6	18.02	9.46	13.11	24.09	9.68	7.95	11.98	25.36	14.31	9.6	7.44	5.56	2.17	6.58
Cd79b	Endogenous	14.91	12.01	16	8.34	12.05	6.78	21.87	16.97	17.9	12.26	10.66	14.87	12.04	14.13	19.74
Cd80	Endogenous	36.45	49.24	33.46	32.18	43.02	27.1	32.8	41.93	47.74	50.08	36.25	44.62	25.94	40.21	41.68
Cd81	Endogenous	3477.28	2993	2768.92	2309.95	2856.75	1596.17	4555.18	4102.2	5382.15	4817.03	2785.03	3966.21	2623.35	3406.81	3461.9
Cd83	Endogenous	91.14	212.58	88.01	84.63	108.42	81.31	97.41	87.85	76.08	108.34	94.9	63.21	75.03	91.28	125.05
Cd84	Endogenous	135.88	201.78	96.01	129.92	117.02	72.6	164.99	109.82	79.06	133.89	165.27	142.54	135.24	98.89	140.41
Cd86	Endogenous	89.48	100.89	56	81.05	60.23	65.82	98.4	75.87	65.64	63.37	68.24	63.21	71.33	42.38	68.01
Cd8a	Endogenous	14.08	16.81	10.18	20.26	15.49	10.65	11.93	9.98	16.41	13.29	15.99	9.92	9.26	10.87	15.36
Cd8b1	Endogenous	10.77	18.02	10.91	8.34	10.33	10.65	12.92	19.97	13.43	14.31	6.4	3.72	7.41	7.61	8.78
Cd9	Endogenous	2746.53	1815.98	2135.42	2308.76	2257.87	2428.62	4144.68	1892.86	1382.83	1323.59	1315.75	878.76	1094.91	1309.48	1522.53
Cd96	Endogenous	16.57	13.21	11.64	10.73	24.09	9.68	1	17.97	22.38	19.42	6.4	16.11	5.56	11.95	4.39
Cd97	Endogenous	367.03	523.65	346.93	208.59	406.14	185.85	313.09	330.45	462.43	535.57	351.86	425.13	276.97	332.53	440.96
Cd99	Endogenous	455.68	492.43	577.49	469.62	530.05	362.99	365.77	743.77	777.19	705.23	723.98	700.28	594.7	756.35	623.05
Cdh1	Endogenous	714.18	453.99	1130.99	1650.82	1201.21	1435.49	1005.86	605	165.58	140.02	956.42	146.25	578.03	387.95	524.33
Cdh5	Endogenous	141.68	88.88	85.1	101.31	201.35	90.02	161.02	173.71	262.54	223.83	82.1	118.99	127.83	99.98	78.98
Cdk1	Endogenous	14.91	15.61	9.46	11.92	15.49	12.58	7.95	13.98	14.92	15.33	22.39	17.35	8.34	14.13	13.16
Cdkn1a	Endogenous	942.02	883.97	749.87	877.26	977.49	1077.34	1099.29	851.59	908.46	1127.35	839.14	925.86	848.51	1113.87	697.64
Ceacam1	Endogenous	96.94	94.88	45.09	36.95	70.56	32.91	58.64	52.91	56.69	54.17	63.97	183.44	41.68	85.85	105.3
Cebpb	Endogenous	423.37	202.98	470.58	544.71	514.56	499.47	488.02	250.58	104.42	170.69	350.79	172.28	305.69	226.03	186.48
Cfb	Endogenous	144.99	69.66	66.19	128.73	113.58	79.37	165.99	97.84	98.45	80.74	56.51	83.04	121.35	64.12	54.85
Cfd	Endogenous	1127.61	261.83	157.1	2215.79	2435.12	2719.97	641.08	958.41	214.81	321.95	341.2	218.14	727.16	128.23	351.02
Cfh	Endogenous	359.58	619.74	303.29	307.52	259.86	195.53	618.22	365.39	571.33	427.23	248.44	494.54	377.01	346.66	467.29
Cfi	Endogenous	33.14	31.23	19.64	27.41	32.7	15.49	27.83	26.96	40.28	35.77	24.52	6.2	12.04	5.43	24.13
Cfp	Endogenous	182.27	114.1	100.37	301.56	175.54	154.87	195.8	153.75	93.98	127.76	185.53	158.65	160.25	66.29	83.37
Chil3	Endogenous	42.25	306.27	80.73	118	36.14	24.2	878.63	80.87	44.75	26.57	131.15	32.23	14.82	123.88	81.17
Chit1	Endogenous	232.81	207.78	257.47	500.61	246.09	332.98	213.69	55.91	37.29	47.02	165.27	33.46	57.43	33.69	78.98
Chuk	Endogenous	222.87	300.26	225.47	153.76	142.84	137.45	216.68	227.62	198.4	207.48	263.36	370.59	301.05	310.8	322.5
Ciita	Endogenous	33.97	54.05	28.37	44.1	74	30.97	39.76	31.95	31.33	38.84	39.45	38.42	51.87	30.43	15.36
Cklf	Endogenous	33.97	75.67	43.64	38.14	80.88	29.04	42.74	47.92	65.64	64.39	63.97	73.13	62.06	81.5	65.82
Clec4a2	Endogenous	61.31	78.07	30.55	75.09	65.4	47.43	57.65	46.92	67.13	53.15	29.85	55.77	63.92	41.29	41.68
Clec4n	Endogenous	111.02	177.75	93.82	133.5	111.86	68.73	183.88	54.91	88.01	117.54	94.9	89.24	109.31	110.84	142.6
Clec5a	Endogenous	23.2	24.02	27.64	26.22	25.81	12.58	42.74	29.95	19.39	30.66	14.93	21.07	23.16	15.21	32.91
Clec7a	Endogenous	60.48	153.73	88.73	101.31	72.28	59.05	444.29	67.89	52.21	61.32	126.88	52.06	38.91	154.31	204.03
Clu	Endogenous	554.28	342.3	830.6	1036.98	597.16	697.9	791.17	577.04	155.14	113.45	619.49	173.52	423.33	334.7	467.29
Cma1	Endogenous	282.52	666.58	447.3	314.67	643.63	399.77	236.56	343.43	469.89	263.69	365.72	339.61	279.75	272.76	285.2
Cmah	Endogenous	80.37	60.05	97.46	77.48	68.84	114.22	49.7	207.66	68.62	60.3	172.73	88	274.19	135.84	98.72
Cmklr1	Endogenous	342.18	332.69	226.2	305.13	223.72	222.63	234.57	330.45	186.47	232.01	278.29	205.75	220.46	234.73	243.52
Cmpk2	Endogenous	74.57	60.05	46.55	59.6	74	58.08	81.5	110.82	120.83	81.77	69.31	102.87	87.07	129.32	72.4
Col1a1	Endogenous	21951.5	13028.9	11417.5	9801.21	37471.7	12306.7	9396.6	20693.7	29284.1	28084.5	9700.7	15407.5	16382.9	11719	9172.49
Col3a1	Endogenous	32935.1	31342.4	24003.8	18970.7	38172.1	16650.9	26675.1	30659.2	39594.9	34696.3	14538.3	26923.2	30875.3	22399.1	25053.8
Col4a1	Endogenous	3496.33	4984.33	3870.81	2772.42	3555.45	1438.39	2256.22	6945.49	8334.27	7600.14	3631.63	4848.7	4158.26	3977.33	3718.58
Colec12	Endogenous	416.74	629.35	343.3	293.21	342.47	182.94	538.71	402.33	477.35	331.15	195.12	264	297.35	291.24	304.95
Cr2	Endogenous	19.06	9.61	10.91	22.65	15.49	14.52	14.91	19.97	22.38	11.24	10.66	12.39	7.41	13.04	13.16
Creb1	Endogenous	265.95	566.89	339.66	238.39	237.49	195.53	227.61	269.55	352.05	365.9	228.18	330.93	236.21	274.94	304.95
Creb5	Endogenous	120.96	74.46	77.1	79.86	101.54	89.05	86.47	126.79	140.22	114.47	129.02	122.7	145.43	135.84	116.27
Crebbp	Endogenous	629.67	867.15	658.95	599.54	688.37	603.04	580.45	742.77	783.16	693.99	664.27	820.51	619.71	734.61	693.26
Crp	Endogenous	15.74	19.22	10.18	14.3	20.65	8.71	13.92	22.96	14.92	17.38	11.73	12.39	9.26	16.3	13.16
Csf1	Endogenous	279.21	102.09	118.55	213.35	192.74	202.3	282.28	264.56	213.32	244.28	263.36	172.28	222.32	165.18	199.64
Csf1r	Endogenous	804.49	756.66	496.76	805.74	488.75	569.16	750.42	697.84	750.34	779.84	603.5	759.78	747.54	545.52	629.64
Csf2	Endogenous	15.74	16.81	12.36	21.45	17.21	13.55	15.9	4.99	14.92	23.51	13.86	13.63	8.34	3.26	10.97
Csf2rb	Endogenous	113.51	245.01	94.55	97.74	137.67	67.76	134.18	77.87	68.62	105.27	118.35	158.65	104.67	103.24	85.56
Csf3	Endogenous	19.06	50.44	30.55	59.6	27.53	18.39	30.81	31.95	35.8	32.71	13.86	22.31	31.49	16.3	21.94
Csf3r	Endogenous	32.31	40.84	19.64	28.61	34.42	26.13	44.73	22.96	32.82	25.55	18.13	40.9	39.83	24.99	28.52
Cspg4	Endogenous	1001.68	1657.44	1525.92	829.58	2459.22	774.37	769.3	1381.71	2021.29	2123.87	1522.6	3377.48	821.65	2198.4	1919.62
Ctla4	Endogenous	123.45	156.14	93.1	115.62	115.3	78.4	151.08	111.81	150.66	127.76	105.56	148.73	88	146.7	127.24
Ctsg	Endogenous	9.94	18.02	7.27	10.73	12.05	9.68	7.95	11.98	14.92	12.26	7.46	4.96	6.48	5.43	8.78
Ctsh	Endogenous	868.28	1157.81	916.43	1097.76	925.86	749.2	1052.57	649.92	523.6	732.83	819.94	961.81	942.07	762.87	1125.45
Ctsl	Endogenous	574.16	1227.47	885.88	780.71	543.82	637.89	1041.64	583.03	501.22	414.96	593.9	308.62	558.57	433.59	585.76
Ctss	Endogenous	786.26	1036.5	597.86	1255.1	1010.19	859.55	2418.23	778.71	577.3	677.63	789.02	400.34	562.28	850.89	1272.43
Ctsw	Endogenous	33.14	46.84	38.55	42.91	30.98	43.56	54.67	18.97	26.85	21.46	35.19	17.35	21.31	13.04	21.94
Cx3cl1	Endogenous	35.63	39.63	22.55	23.84	41.3	27.1	24.85	37.94	47.74	49.06	26.66	29.75	25.01	22.82	19.74
Cx3cr1	Endogenous	155.76	160.94	121.46	96.55	80.88	58.08	256.43	223.63	331.16	308.67	140.74	375.55	176	262.98	247.91
Cxcl1	Endogenous	29.83	22.82	18.18	23.84	15.49	14.52	44.73	17.97	34.31	15.33	13.86	18.59	13.89	18.47	52.65
Cxcl10	Endogenous	29	88.88	47.28	81.05	44.74	41.62	178.91	46.92	40.28	50.08	30.92	24.79	39.83	34.77	35.1
Cxcl11	Endogenous	33.14	34.83	16	22.65	22.37	13.55	23.85	26.96	29.83	33.73	12.79	19.83	10.19	7.61	15.36
Cxcl12	Endogenous	826.03	407.15	424.03	765.22	550.7	837.29	879.63	983.37	1127.74	711.36	649.34	494.54	786.45	733.52	732.75
Cxcl13	Endogenous	12.43	10.81	8	11.92	22.37	29.04	58.64	15.97	10.44	7.15	14.93	24.79	19.45	6.52	4.39
Cxcl14	Endogenous	981.79	1250.29	1440.83	1437.46	841.54	1186.72	1248.37	1268.9	544.48	656.17	1227.25	532.96	964.3	1041.06	662.54
Cxcl15	Endogenous	16.57	25.22	13.09	15.5	13.77	6.78	2.98	16.97	17.9	12.26	7.46	7.44	5.56	8.69	8.78
Cxcl16	Endogenous	308.21	282.25	327.3	457.7	296	236.18	540.7	164.73	129.78	133.89	266.56	99.16	142.65	198.87	379.54
Cxcl2	Endogenous	15.74	20.42	17.46	11.92	8.6	17.42	15.9	9.98	29.83	9.2	17.06	7.44	10.19	6.52	10.97
Cxcl3	Endogenous	29.83	20.42	23.27	35.76	13.77	10.65	10.93	6.99	19.39	17.38	6.4	9.92	9.26	6.52	26.33
Cxcl5	Endogenous	30.66	34.83	20.37	15.5	17.21	15.49	46.71	25.96	41.77	33.73	15.99	39.66	10.19	26.08	21.94
Cxcl9	Endogenous	27.34	51.64	25.46	73.9	39.58	27.1	154.06	50.92	40.28	32.71	30.92	27.27	48.17	132.58	39.49
Cxcr1	Endogenous	10.77	13.21	5.82	13.11	13.77	3.87	7.95	8.99	4.48	11.24	10.66	6.2	7.41	5.43	8.78
Cxcr2	Endogenous	69.6	67.26	88.73	91.78	53.35	31.94	63.61	38.94	65.64	45.99	44.78	22.31	46.32	31.51	52.65
Cxcr3	Endogenous	42.25	62.45	30.55	67.94	44.74	32.91	36.78	36.94	58.18	37.82	26.66	28.51	23.16	34.77	39.49
Cxcr4	Endogenous	93.62	104.49	117.83	87.01	122.19	96.8	116.29	109.82	82.04	65.41	77.84	57.01	59.28	80.42	85.56
Cxcr5	Endogenous	8.29	7.21	5.82	9.54	17.21	3.87	6.96	4.99	4.48	10.22	4.26	11.15	5.56	6.52	8.78
Cxcr6	Endogenous	24.03	52.85	34.18	44.1	29.26	27.1	63.61	20.97	19.39	15.33	30.92	17.35	12.97	14.13	46.07
Cybb	Endogenous	112.68	72.06	65.46	158.53	141.12	90.02	272.34	136.77	137.24	144.11	115.15	121.47	107.45	145.62	184.28
Cyfip2	Endogenous	88.65	190.97	95.28	64.36	142.84	138.42	90.45	117.8	114.86	129.8	111.96	115.27	157.47	115.19	127.24
Cyld	Endogenous	135.05	146.53	113.46	146.61	182.42	135.51	171.95	124.79	167.07	101.19	145.01	182.2	158.4	206.47	195.25
Ddx58	Endogenous	162.39	130.91	130.92	132.3	142.84	145.19	232.58	149.75	180.5	149.22	172.73	211.94	194.53	260.81	212.8
Ddx60	Endogenous	59.65	58.85	53.82	98.93	72.28	46.46	45.72	64.89	61.16	47.02	78.9	116.51	115.79	102.15	83.37
Defb1	Endogenous	357.09	584.91	473.49	525.64	256.42	267.16	645.06	86.86	40.28	42.93	192.99	29.75	133.39	73.9	208.42
Dll4	Endogenous	39.77	28.83	18.91	23.84	25.81	21.3	15.9	26.96	34.31	34.75	26.66	35.94	20.38	35.86	21.94
Dmbt1	Endogenous	9.11	8.41	12.36	19.07	15.49	6.78	9.94	10.98	22.38	10.22	4.26	3.72	7.41	8.69	6.58
Dock9	Endogenous	311.52	526.06	369.48	224.08	320.09	202.3	228.6	234.61	302.82	222.81	276.16	384.23	294.57	296.67	201.83
Dpp4	Endogenous	92.79	144.13	104.01	128.73	137.67	156.81	75.54	143.76	68.62	56.21	146.08	202.03	172.3	77.16	83.37
Dusp4	Endogenous	472.25	575.3	435.67	277.72	684.93	369.76	598.35	506.16	633.98	704.21	666.4	1699.27	347.37	1049.76	943.36
Dusp6	Endogenous	1136.72	922.4	876.42	772.37	1039.45	580.78	1028.72	1328.8	1327.64	1369.58	989.48	1517.08	1097.69	1692	1540.08
Ebi3	Endogenous	20.71	16.81	13.09	33.37	22.37	19.36	26.84	17.97	23.87	26.57	17.06	16.11	26.86	16.3	15.36
Ecsit	Endogenous	50.54	51.64	45.82	56.02	56.79	59.05	49.7	47.92	50.72	41.91	50.11	45.86	64.84	51.08	50.46
Egfr	Endogenous	317.32	329.09	359.3	246.73	419.91	317.49	204.75	323.46	284.92	224.86	309.21	290.03	370.53	243.42	199.64
Egr1	Endogenous	662.81	326.68	440.76	468.43	614.37	599.17	468.14	586.03	378.9	405.76	475.55	223.1	442.78	587.91	217.19
Egr2	Endogenous	72.91	105.69	93.1	63.17	122.19	90.99	53.67	73.88	74.59	43.95	102.36	45.86	64.84	74.98	81.17
Egr3	Endogenous	274.24	72.06	169.47	203.82	237.49	248.77	164	169.72	122.32	93.01	268.69	143.78	247.33	208.65	125.05
Elane	Endogenous	18.23	15.61	10.91	13.11	17.21	11.62	7.95	20.97	26.85	17.38	4.26	12.39	7.41	9.78	10.97
Elk1	Endogenous	14.08	46.84	21.09	7.15	13.77	15.49	14.91	25.96	40.28	19.42	19.19	50.82	28.72	20.65	24.13
Emr1	Endogenous	320.64	84.07	93.82	210.97	242.65	148.1	269.35	210.65	174.53	279.03	178.06	183.44	235.29	146.7	184.28
Eng	Endogenous	473.08	1024.49	514.94	449.36	543.82	234.25	509.89	734.78	932.33	805.39	522.46	699.05	471.5	686.8	706.42
Entpd1	Endogenous	144.99	183.76	109.83	133.5	222	128.74	162.01	134.78	155.14	152.29	123.68	126.42	137.1	128.23	127.24
Eomes	Endogenous	19.88	26.42	18.91	30.99	18.93	12.58	12.92	23.96	29.83	29.64	18.13	13.63	9.26	9.78	24.13
Ep300	Endogenous	323.12	371.12	317.11	327.78	351.07	352.34	349.86	343.43	320.72	322.98	366.79	406.54	374.23	389.04	388.31
Epcam	Endogenous	449.88	628.15	824.78	768.79	504.23	718.23	455.22	272.55	59.67	68.48	586.44	73.13	310.32	209.73	451.93
Epsti1	Endogenous	14.08	8.41	8	7.15	3.44	2.9	14.91	6.99	10.44	9.2	4.26	3.72	3.71	7.61	2.19
Erbb2	Endogenous	381.12	227	328.75	399.3	456.05	500.44	330.98	354.41	352.05	302.53	495.8	317.3	424.26	412.95	410.25
Ets1	Endogenous	635.47	613.73	581.13	443.4	376.88	289.42	695.75	751.75	914.43	729.76	897.78	1038.65	666.95	1206.24	1064.02
Ewsr1	Endogenous	686.84	650.97	658.23	710.39	764.1	761.79	730.54	796.68	859.23	831.97	1186.73	1427.84	1214.41	1376.85	1143
F12	Endogenous	13.26	20.42	12.36	8.34	22.37	8.71	5.96	12.98	29.83	10.22	9.6	7.44	5.56	2.17	10.97
F13a1	Endogenous	745.66	643.76	286.57	616.23	579.96	439.45	500.94	461.24	363.98	424.16	438.23	651.95	792.01	233.64	351.02
F2rl1	Endogenous	107.71	31.23	83.64	154.95	110.14	161.65	90.45	68.89	41.77	38.84	90.63	16.11	80.59	35.86	28.52
Fadd	Endogenous	48.05	45.64	42.91	42.91	48.19	30.01	37.77	55.91	55.19	53.15	44.78	55.77	53.73	44.55	39.49
Fap	Endogenous	176.47	313.47	202.2	182.36	185.86	124.87	326.01	332.45	429.62	316.84	203.65	347.04	275.12	290.15	335.66
Fas	Endogenous	77.05	184.96	82.19	87.01	80.88	69.69	60.63	75.87	93.98	101.19	63.97	85.52	78.74	70.64	89.95
Fasl	Endogenous	5.8	13.21	9.46	16.69	24.09	9.68	11.93	13.98	14.92	12.26	8.53	7.44	6.48	7.61	13.16
Fcer1a	Endogenous	78.71	100.89	60.37	46.49	37.86	28.07	53.67	50.92	55.19	44.97	38.38	28.51	50.02	38.03	37.3
Fcer1g	Endogenous	184.76	210.18	138.19	233.62	235.77	122.93	243.51	167.72	161.11	201.35	161	158.65	197.31	181.48	188.67
Fcer2a	Endogenous	4.14	14.41	8.73	11.92	17.21	3.87	7.95	12.98	14.92	9.2	8.53	3.72	9.26	1.09	4.39
Fcgr1	Endogenous	101.91	100.89	59.64	73.9	79.16	47.43	131.2	115.81	85.03	93.01	71.44	95.44	105.6	103.24	116.27
Fcgr2b	Endogenous	1274.26	623.34	615.32	990.49	598.89	408.48	2822.76	1481.54	1693.11	1957.27	731.44	1150.2	868.89	1181.25	1298.76
Fcgr3	Endogenous	153.28	68.46	53.09	135.88	103.26	76.47	216.68	100.83	77.57	109.36	90.63	73.13	88	107.58	140.41
Fcgr4	Endogenous	36.45	40.84	14.55	34.57	22.37	20.33	122.25	32.95	37.29	48.04	23.46	33.46	22.23	55.42	28.52
Fez1	Endogenous	302.41	431.17	280.02	205.01	265.02	106.48	397.57	298.51	404.26	405.76	323.07	542.88	265.85	593.34	438.77
Flt3	Endogenous	26.51	25.22	16.73	32.18	30.98	20.33	22.86	21.96	19.39	26.57	12.79	18.59	9.26	17.39	21.94
Flt3l	Endogenous	54.68	64.86	28.37	38.14	44.74	30.97	38.76	51.91	62.65	43.95	55.44	69.41	40.76	57.6	74.59
Fn1	Endogenous	1792.91	2607.46	2083.05	1530.43	2366.29	1106.38	1956.05	2827.31	3965.01	4863.03	2150.62	4366.55	2514.97	2587.44	2590.94
Fos	Endogenous	490.48	780.68	186.92	423.13	528.33	475.27	378.69	310.49	766.75	244.28	438.23	449.92	879.08	1624.62	410.25
Foxj1	Endogenous	8.29	22.82	9.46	11.92	13.77	12.58	8.95	14.98	26.85	17.38	9.6	11.15	14.82	10.87	6.58
Foxp3	Endogenous	43.91	49.24	18.91	36.95	43.02	24.2	31.81	29.95	32.82	32.71	26.66	16.11	14.82	8.69	35.1
Fpr2	Endogenous	12.43	15.61	10.91	26.22	22.37	7.74	13.92	14.98	19.39	14.31	8.53	6.2	10.19	13.04	17.55
Fut7	Endogenous	12.43	38.43	18.18	19.07	24.09	16.46	15.9	19.97	17.9	11.24	11.73	16.11	12.97	10.87	13.16
Fyn	Endogenous	516.17	516.45	423.3	395.72	545.54	368.79	546.66	705.83	848.79	713.41	546.98	941.98	622.49	906.31	789.79
Gata3	Endogenous	401.83	290.65	437.12	913.02	504.23	965.06	387.63	226.62	50.72	60.3	368.92	81.8	444.63	114.1	96.53
Gbp2b	Endogenous	19.88	13.21	16	15.5	20.65	15.49	14.91	18.97	14.92	18.4	22.39	19.83	8.34	20.65	10.97
Gbp5	Endogenous	36.45	50.44	27.64	65.56	37.86	36.78	92.44	44.93	44.75	30.66	53.31	45.86	49.1	131.49	54.85
Gfi1	Endogenous	25.68	56.45	32	40.53	24.09	22.26	29.82	33.94	46.24	48.04	15.99	34.7	22.23	19.56	32.91
Glycam1	Endogenous	16.57	10.81	8	20.26	18.93	10.65	10.93	14.98	11.93	22.49	8.53	12.39	8.34	11.95	13.16
Gpi1	Endogenous	1265.97	844.33	1185.54	1338.53	1538.52	1141.23	1777.14	991.36	951.72	1039.45	1290.16	1494.77	863.33	1129.08	1006.98
Gpr183	Endogenous	44.74	57.65	26.18	41.72	36.14	24.2	39.76	43.93	50.72	52.13	22.39	27.27	28.72	30.43	41.68
Gpr44	Endogenous	33.14	62.45	24	48.87	48.19	28.07	28.82	35.94	61.16	52.13	23.46	27.27	25.01	28.25	57.04
Gtf3c1	Endogenous	164.05	146.53	126.55	125.15	127.35	139.39	160.02	187.69	187.96	164.55	191.92	209.47	162.11	156.49	131.63
Gzma	Endogenous	31.48	52.85	24.73	39.33	29.26	20.33	40.75	36.94	50.72	52.13	23.46	17.35	23.16	32.6	32.91
Gzmb	Endogenous	12.43	21.62	14.55	17.88	8.6	8.71	20.87	22.96	14.92	15.33	15.99	4.96	7.41	8.69	8.78
Gzmk	Endogenous	18.23	15.61	12.36	25.03	22.37	8.71	7.95	15.97	19.39	14.31	12.79	11.15	2.78	10.87	6.58
Gzmm	Endogenous	14.08	16.81	10.18	20.26	12.05	6.78	11.93	10.98	5.97	17.38	13.86	19.83	6.48	6.52	4.39
H2-Aa	Endogenous	3503.79	3818.12	2826.38	3826.08	4285.13	3180.72	5221.11	2183.38	1409.68	2145.33	2470.49	2109.53	2254.67	1774.59	2119.26
H2-Ab1	Endogenous	2111.06	2653.1	1923.77	2653.23	3114.89	2201.14	2986.76	1408.67	938.3	1632.25	1555.65	1144	1376.52	1139.95	1283.4
H2-D1	Endogenous	2943.72	2171.49	2926.75	4382.71	2318.1	2930.99	5579.92	2442.95	1761.73	1667	3117.7	1586.49	1625.7	2415.74	2610.68
H2-DMb1	Endogenous	110.19	168.15	90.19	157.33	163.49	98.73	140.14	83.86	55.19	82.79	105.56	74.37	102.82	66.29	81.17
H2-DMb2	Endogenous	60.48	52.85	52.37	59.6	104.98	46.46	72.56	44.93	26.85	47.02	61.84	39.66	43.54	30.43	28.52
H2-Dma	Endogenous	158.25	106.89	120.74	221.7	246.09	133.58	235.56	129.78	73.09	128.78	179.13	111.55	119.5	107.58	81.17
H2-Ea-ps	Endogenous	10.77	13.21	13.82	13.11	8.6	4.84	3.98	13.98	14.92	13.29	9.6	11.15	5.56	10.87	4.39
H2-Eb1	Endogenous	1116.01	847.94	853.15	1234.84	1698.56	1004.74	1204.64	832.62	662.33	933.15	1092.9	849.02	819.8	823.72	813.92
H2-K1	Endogenous	720.81	389.14	787.69	1116.83	752.05	792.76	1250.36	456.24	311.77	312.75	838.07	339.61	434.45	597.69	614.28
H2-M3	Endogenous	82.85	218.59	118.55	100.12	103.26	90.99	147.1	81.86	123.81	103.23	114.09	122.7	105.6	133.66	164.54
H2-Ob	Endogenous	42.25	76.87	36.37	33.37	61.95	29.04	33.79	47.92	58.18	50.08	15.99	60.73	25.94	32.6	41.68
H2-Q1	Endogenous	17.4	20.42	8.73	16.69	17.21	6.78	9.94	14.98	16.41	21.46	4.26	9.92	10.19	9.78	6.58
H2-Q10	Endogenous	38.94	37.23	35.64	48.87	25.81	30.97	36.78	27.95	50.72	49.06	33.05	35.94	30.57	27.17	37.3
H2-Q2	Endogenous	27.34	36.03	12.36	34.57	22.37	14.52	15.9	33.94	35.8	30.66	14.93	24.79	11.12	14.13	24.13
H2-T23	Endogenous	710.87	1001.67	855.33	1209.81	881.12	872.13	1472.01	548.09	490.78	482.42	830.61	588.73	594.7	882.4	781.01
H60a	Endogenous	22.37	37.23	15.27	20.26	36.14	9.68	7.95	27.95	31.33	43.95	11.73	17.35	15.75	19.56	13.16
Hamp	Endogenous	16.57	24.02	19.64	38.14	37.86	18.39	13.92	24.96	25.36	25.55	18.13	22.31	18.53	18.47	17.55
Havcr2	Endogenous	45.57	68.46	40.73	50.06	37.86	29.04	41.75	31.95	37.29	34.75	40.52	35.94	29.64	38.03	39.49
Hc	Endogenous	38.11	30.03	16.73	19.07	22.37	11.62	14.91	31.95	50.72	32.71	7.46	14.87	25.94	24.99	21.94
Hck	Endogenous	85.34	64.86	68.37	56.02	96.37	49.37	93.43	112.81	93.98	108.34	88.5	111.55	67.62	124.97	94.34
Hcst	Endogenous	18.23	32.43	15.27	11.92	29.26	11.62	16.9	13.98	25.36	28.62	7.46	13.63	13.89	13.04	8.78
Herc6	Endogenous	49.71	37.23	31.27	32.18	39.58	22.26	71.56	39.93	38.78	34.75	27.72	33.46	40.76	41.29	50.46
Hif1a	Endogenous	1014.93	1044.91	1053.89	1351.64	853.58	929.24	1630.04	802.67	722	650.04	775.16	661.86	840.17	866.1	1037.69
Hmgb1	Endogenous	585.76	647.36	647.32	659.14	638.47	718.23	662.95	673.88	645.92	560.1	609.89	704	754.95	795.47	934.58
Hras	Endogenous	29.83	45.64	17.46	35.76	22.37	20.33	24.85	23.96	47.74	29.64	41.58	29.75	29.64	27.17	17.55
Hsd11b1	Endogenous	95.28	183.76	77.82	114.42	80.88	66.79	194.81	45.92	46.24	63.37	34.12	39.66	56.51	51.08	65.82
Hspb2	Endogenous	136.71	168.15	104.73	85.82	108.42	87.12	181.89	141.77	198.4	190.11	175.93	254.09	162.11	279.28	182.09
Icam1	Endogenous	108.54	84.07	109.1	104.89	99.81	83.24	179.9	78.87	74.59	106.3	54.38	37.18	64.84	63.03	70.2
Icam2	Endogenous	36.45	38.43	26.18	48.87	55.07	35.81	39.76	51.91	55.19	44.97	26.66	34.7	41.68	31.51	32.91
Icam4	Endogenous	13.26	16.81	13.82	26.22	15.49	16.46	8.95	29.95	28.34	15.33	15.99	12.39	10.19	6.52	8.78
Icos	Endogenous	52.2	109.29	42.18	47.68	34.42	26.13	82.5	35.94	34.31	27.6	30.92	19.83	20.38	22.82	54.85
Icosl	Endogenous	120.13	205.38	123.64	109.66	130.79	78.4	121.26	96.84	108.9	95.05	142.88	157.41	139.87	103.24	103.11
Ido1	Endogenous	25.68	25.22	24	11.92	29.26	9.68	10.93	26.96	19.39	30.66	9.6	21.07	11.12	14.13	10.97
Ifi27	Endogenous	828.52	1225.06	794.24	818.85	903.49	699.84	963.12	902.5	1014.37	918.84	827.41	1209.7	865.19	1132.34	1129.83
Ifi35	Endogenous	165.7	257.02	183.29	156.14	160.05	136.48	282.28	132.78	137.24	97.1	152.47	128.9	113.94	157.57	171.12
Ifi44	Endogenous	28.17	40.84	29.82	36.95	30.98	23.23	48.7	37.94	49.23	26.57	21.32	26.03	25.01	23.91	32.91
Ifi44l	Endogenous	13.26	18.02	10.18	20.26	17.21	4.84	14.91	14.98	13.43	9.2	10.66	8.68	7.41	7.61	4.39
Ifih1	Endogenous	98.59	106.89	101.1	115.62	91.21	93.89	158.03	89.85	93.98	74.61	114.09	99.16	97.26	120.62	103.11
Ifit1	Endogenous	67.94	73.26	36.37	69.13	48.19	34.85	104.36	64.89	92.49	50.08	42.65	47.1	25.94	65.2	48.26
Ifit2	Endogenous	123.45	50.44	51.64	53.64	108.42	34.85	173.94	188.69	238.68	140.02	153.54	188.4	147.29	201.04	190.87
Ifit3	Endogenous	139.19	307.47	197.1	182.36	215.12	90.02	398.57	248.59	395.31	275.96	300.68	376.79	253.81	733.52	730.55
Ifitm1	Endogenous	177.3	111.7	142.56	107.27	180.7	54.21	212.7	87.85	79.06	88.92	90.63	61.97	88.93	102.15	89.95
Ifitm2	Endogenous	2272.62	4490.7	2875.11	2166.92	2331.87	1585.52	2775.05	2358.09	2792.51	2791.28	1688.93	2076.07	1744.27	1900.64	1838.45
Ifna1	Endogenous	35.63	51.64	20.37	44.1	24.09	22.26	22.86	39.93	50.72	38.84	20.26	29.75	16.67	19.56	19.74
Ifna2	Endogenous	9.94	22.82	13.82	22.65	22.37	6.78	10.93	20.97	14.92	18.4	10.66	16.11	9.26	13.04	19.74
Ifna4	Endogenous	29	42.04	21.09	47.68	32.7	27.1	14.91	27.95	59.67	41.91	13.86	32.23	11.12	15.21	26.33
Ifnar1	Endogenous	354.6	309.87	309.84	246.73	301.16	215.86	429.38	405.33	501.22	435.4	388.11	451.16	358.49	471.63	416.83
Ifnar2	Endogenous	215.41	106.89	130.92	166.87	208.23	146.16	342.91	221.63	220.78	250.41	180.2	308.62	207.5	258.64	261.07
Ifnb1	Endogenous	18.23	14.41	11.64	11.92	12.05	5.81	6.96	13.98	17.9	17.38	9.6	6.2	4.63	8.69	2.19
Ifng	Endogenous	20.71	26.42	13.09	30.99	18.93	7.74	20.87	23.96	26.85	22.49	13.86	24.79	10.19	14.13	6.58
Ifngr1	Endogenous	639.61	668.98	573.13	610.27	567.91	439.45	717.62	598.01	620.56	661.28	442.49	646.99	414.99	482.5	598.92
Ifnl2	Endogenous	11.6	22.82	16	19.07	25.81	13.55	14.91	20.97	19.39	16.35	8.53	13.63	3.71	8.69	13.16
Igf1r	Endogenous	243.58	357.91	320.02	274.14	251.26	208.11	251.46	314.48	344.59	340.35	460.62	515.61	360.34	467.28	473.87
Igf2r	Endogenous	325.61	269.03	290.2	219.31	282.23	239.09	240.53	352.42	359.51	324	266.56	291.27	322.36	227.12	276.43
Igll1	Endogenous	16.57	19.22	5.82	15.5	17.21	5.81	14.91	18.97	16.41	18.4	8.53	18.59	19.45	14.13	10.97
Ikbkb	Endogenous	277.55	165.74	193.47	184.75	203.07	206.18	287.25	195.68	187.96	214.64	367.85	387.95	288.09	383.61	261.07
Ikbke	Endogenous	59.65	114.1	78.55	61.98	87.77	54.21	80.51	64.89	68.62	100.16	121.55	137.58	84.3	121.71	98.72
Ikbkg	Endogenous	82.85	106.89	77.82	95.35	77.44	80.34	68.58	96.84	104.42	93.01	93.83	132.62	78.74	84.76	111.89
Ikzf1	Endogenous	41.43	55.25	35.64	25.03	44.74	21.3	31.81	33.94	31.33	32.71	33.05	55.77	25.01	27.17	41.68
Ikzf2	Endogenous	112.68	63.66	47.28	98.93	87.77	105.51	83.49	39.93	40.28	42.93	81.03	106.59	60.21	57.6	57.04
Il10	Endogenous	10.77	27.62	19.64	20.26	13.77	8.71	22.86	12.98	14.92	14.31	20.26	8.68	11.12	16.3	15.36
Il10ra	Endogenous	64.62	67.26	27.64	34.57	70.56	39.69	66.59	34.94	71.6	57.24	61.84	45.86	48.17	54.34	54.85
Il11	Endogenous	7.46	20.42	13.82	11.92	18.93	9.68	14.91	16.97	23.87	16.35	8.53	4.96	7.41	10.87	6.58
Il11ra1	Endogenous	87.82	134.52	87.28	85.82	111.86	73.57	79.51	97.84	71.6	82.79	67.17	76.85	102.82	59.77	39.49
Il12a	Endogenous	25.68	33.63	16.73	25.03	32.7	14.52	13.92	29.95	47.74	30.66	13.86	14.87	7.41	11.95	10.97
Il12b	Endogenous	16.57	15.61	18.91	13.11	13.77	9.68	15.9	19.97	17.9	19.42	13.86	7.44	7.41	5.43	10.97
Il12rb1	Endogenous	19.06	24.02	11.64	19.07	15.49	12.58	23.85	14.98	17.9	18.4	10.66	17.35	10.19	11.95	13.16
Il12rb2	Endogenous	33.97	39.63	32	72.71	36.14	66.79	26.84	18.97	13.43	16.35	20.26	11.15	16.67	6.52	13.16
Il13	Endogenous	16.57	42.04	20.37	28.61	30.98	6.78	19.88	16.97	29.83	20.44	18.13	11.15	16.67	7.61	10.97
Il13ra1	Endogenous	441.6	631.75	577.49	653.18	320.09	424.94	637.11	168.72	123.81	133.89	270.83	121.47	164.89	139.1	230.35
Il13ra2	Endogenous	51.37	52.85	63.28	67.94	46.47	29.04	70.57	24.96	14.92	19.42	30.92	19.83	19.45	16.3	54.85
Il15	Endogenous	31.48	44.44	22.55	27.41	20.65	7.74	24.85	23.96	25.36	28.62	13.86	48.34	23.16	29.34	37.3
Il15ra	Endogenous	29.83	33.63	31.27	27.41	32.7	23.23	22.86	18.97	14.92	24.53	39.45	33.46	37.05	21.73	21.94
Il16	Endogenous	51.37	39.63	40.73	29.8	48.19	20.33	44.73	52.91	53.7	60.3	49.05	161.13	36.13	57.6	70.2
Il17a	Endogenous	11.6	19.22	8.73	17.88	12.05	10.65	13.92	18.97	16.41	20.44	11.73	17.35	2.78	9.78	8.78
Il17b	Endogenous	14.91	26.42	13.82	19.07	25.81	11.62	14.91	16.97	17.9	13.29	12.79	14.87	9.26	14.13	28.52
Il17f	Endogenous	22.37	28.83	9.46	17.88	13.77	8.71	16.9	12.98	26.85	14.31	5.33	11.15	11.12	15.21	15.36
Il17ra	Endogenous	87.82	66.06	64	94.16	92.93	81.31	111.32	66.89	73.09	70.52	102.36	61.97	73.18	59.77	87.75
Il17rb	Endogenous	35.63	61.25	21.82	45.29	30.98	12.58	22.86	25.96	56.69	37.82	31.99	28.51	26.86	29.34	35.1
Il18	Endogenous	143.33	157.34	169.47	216.93	125.63	143.26	151.08	48.92	32.82	30.66	154.61	49.58	74.11	52.16	96.53
Il18r1	Endogenous	81.19	86.48	71.28	106.08	91.21	47.43	94.42	53.91	50.72	34.75	75.7	27.27	45.39	40.21	57.04
Il18rap	Endogenous	26.51	37.23	23.27	21.45	20.65	12.58	22.86	16.97	17.9	17.38	23.46	18.59	13.89	10.87	17.55
Il19	Endogenous	69.6	64.86	73.46	90.59	17.21	10.65	304.14	11.98	19.39	17.38	20.26	16.11	12.97	19.56	30.71
Il1a	Endogenous	44.74	44.44	57.46	57.21	20.65	34.85	52.68	15.97	19.39	9.2	27.72	9.92	12.04	8.69	28.52
Il1b	Endogenous	55.51	52.85	29.09	38.14	51.63	29.04	133.19	35.94	35.8	47.02	28.79	37.18	41.68	41.29	41.68
Il1r1	Endogenous	222.87	325.48	215.29	219.31	249.54	200.37	239.54	216.64	225.25	218.72	247.37	236.73	301.98	191.26	219.39
Il1r2	Endogenous	57.17	56.45	39.28	77.48	58.51	72.6	56.65	29.95	23.87	26.57	37.32	53.3	29.64	14.13	21.94
Il1rap	Endogenous	999.19	273.84	576.04	554.25	521.44	314.59	1010.83	1047.26	1205.31	1258.17	632.28	841.58	693.82	763.95	818.31
Il1rapl2	Endogenous	13.26	21.62	8	16.69	20.65	8.71	12.92	8.99	11.93	21.46	12.79	11.15	7.41	6.52	15.36
Il1rl1	Endogenous	95.28	79.27	57.46	38.14	72.28	28.07	94.42	56.91	74.59	55.19	74.64	79.32	52.8	63.03	54.85
Il1rl2	Endogenous	227.01	228.2	280.75	394.53	252.98	238.12	312.09	192.68	156.63	121.63	208.98	128.9	170.44	151.05	162.34
Il1rn	Endogenous	193.87	233	299.66	370.69	216.84	332.01	358.81	112.81	47.74	64.39	154.61	32.23	100.97	55.42	133.82
Il2	Endogenous	14.91	22.82	16	27.41	24.09	15.49	18.88	16.97	29.83	28.62	12.79	12.39	11.12	15.21	24.13
Il21	Endogenous	17.4	13.21	8.73	16.69	13.77	10.65	11.93	17.97	22.38	15.33	9.6	8.68	8.34	7.61	6.58
Il21r	Endogenous	37.28	38.43	26.91	22.65	37.86	12.58	45.72	27.95	41.77	65.41	28.79	33.46	26.86	29.34	26.33
Il22	Endogenous	19.88	19.22	15.27	22.65	24.09	13.55	12.92	22.96	22.38	15.33	9.6	21.07	16.67	8.69	13.16
Il22ra1	Endogenous	73.74	45.64	50.19	107.27	70.56	68.73	62.62	36.94	53.7	51.1	66.11	24.79	37.98	28.25	54.85
Il22ra2	Endogenous	34.8	42.04	28.37	61.98	56.79	31.94	11.93	28.95	49.23	33.73	11.73	16.11	16.67	15.21	10.97
Il23a	Endogenous	8.29	16.81	15.27	16.69	18.93	10.65	21.87	16.97	17.9	12.26	12.79	12.39	9.26	14.13	13.16
Il23r	Endogenous	14.08	21.62	8.73	10.73	24.09	14.52	8.95	13.98	17.9	14.31	17.06	11.15	9.26	11.95	10.97
Il24	Endogenous	25.68	25.22	21.09	39.33	10.33	5.81	81.5	9.98	13.43	19.42	14.93	14.87	9.26	13.04	17.55
Il25	Endogenous	22.37	18.02	15.27	20.26	34.42	11.62	15.9	33.94	20.88	18.4	9.6	24.79	14.82	17.39	13.16
Il27	Endogenous	18.23	21.62	16	20.26	32.7	6.78	11.93	23.96	26.85	13.29	17.06	14.87	7.41	14.13	10.97
Il2ra	Endogenous	69.6	93.68	58.91	72.71	96.37	65.82	86.47	54.91	49.23	49.06	66.11	49.58	37.98	35.86	68.01
Il2rb	Endogenous	65.45	147.73	64	95.35	82.6	55.17	142.13	48.92	43.26	32.71	60.78	38.42	47.24	70.64	59.23
Il2rg	Endogenous	43.08	44.44	41.46	57.21	43.02	37.75	55.66	24.96	22.38	34.75	36.25	32.23	28.72	33.69	46.07
Il3	Endogenous	14.08	16.81	13.09	19.07	20.65	11.62	14.91	16.97	25.36	15.33	12.79	11.15	4.63	11.95	13.16
Il34	Endogenous	248.55	350.7	231.29	326.59	251.26	283.61	277.31	116.81	156.63	145.13	195.12	172.28	176.93	182.57	149.18
Il3ra	Endogenous	89.48	142.92	123.64	114.42	117.02	86.15	128.22	172.71	195.42	214.64	121.55	158.65	113.94	109.76	118.47
Il4	Endogenous	8.29	22.82	10.18	13.11	17.21	9.68	17.89	10.98	26.85	15.33	9.6	11.15	7.41	16.3	17.55
Il4ra	Endogenous	231.98	272.64	233.47	307.52	139.4	131.64	305.14	226.62	186.47	224.86	303.88	262.76	242.7	218.43	298.36
Il5	Endogenous	32.31	43.24	19.64	54.83	36.14	13.55	23.85	28.95	56.69	28.62	15.99	21.07	21.31	24.99	30.71
Il5ra	Endogenous	12.43	16.81	8.73	25.03	18.93	9.68	13.92	5.99	17.9	14.31	15.99	23.55	6.48	13.04	19.74
Il6	Endogenous	18.23	31.23	13.09	21.45	39.58	18.39	46.71	11.98	14.92	23.51	15.99	6.2	18.53	9.78	15.36
Il6ra	Endogenous	227.01	184.96	132.37	292.02	290.84	275.87	167.97	139.77	123.81	181.93	156.74	182.2	152.84	88.02	133.82
Il6st	Endogenous	606.47	784.28	576.04	425.52	650.51	325.24	688.79	730.79	994.98	858.54	612.03	787.05	560.43	691.14	710.81
Il7	Endogenous	21.54	14.41	13.09	25.03	30.98	12.58	15.9	13.98	17.9	17.38	12.79	6.2	18.53	16.3	28.52
Il7r	Endogenous	48.05	128.51	67.64	76.28	82.6	49.37	93.43	41.93	29.83	33.73	59.71	33.46	33.35	47.81	74.59
Il9	Endogenous	7.46	12.01	8.73	2.38	8.6	9.68	10.93	8.99	10.44	10.22	8.53	4.96	1	4.35	8.78
Ilf3	Endogenous	149.96	97.28	109.83	118	111.86	109.38	127.22	149.75	131.27	135.94	118.35	121.47	138.95	124.97	118.47
Inpp5d	Endogenous	53.02	61.25	35.64	44.1	46.47	38.72	27.83	24.96	53.7	48.04	40.52	39.66	44.46	29.34	28.52
Irak1	Endogenous	214.59	147.73	147.65	169.25	163.49	151.97	181.89	189.69	211.82	183.97	229.24	268.96	225.1	222.77	228.16
Irak2	Endogenous	86.17	136.92	77.82	91.78	101.54	73.57	99.39	63.89	80.55	78.7	118.35	137.58	99.12	117.36	103.11
Irak3	Endogenous	116.82	147.73	114.19	103.7	123.91	97.76	134.18	71.88	79.06	97.1	102.36	99.16	58.36	81.5	65.82
Irak4	Endogenous	222.87	183.76	154.92	203.82	178.98	128.74	220.65	184.69	205.86	192.15	189.79	213.18	144.51	226.03	221.58
Irf1	Endogenous	232.81	235.4	237.83	292.02	285.68	168.43	421.43	208.65	244.64	237.12	235.64	278.87	290.87	464.02	313.72
Irf2	Endogenous	236.13	148.93	164.37	188.32	216.84	158.75	239.54	222.63	217.79	189.08	235.64	291.27	189.9	301.02	243.52
Irf3	Endogenous	214.59	201.78	176.74	168.06	165.21	154.87	162.01	187.69	165.58	178.86	224.98	252.85	226.02	228.21	197.45
Irf4	Endogenous	34.8	21.62	20.37	28.61	43.02	38.72	20.87	33.94	20.88	27.6	29.85	24.79	26.86	21.73	54.85
Irf5	Endogenous	159.9	147.73	112.74	158.53	144.56	133.58	162.01	99.83	93.98	96.07	173.8	133.86	183.41	129.32	146.99
Irf7	Endogenous	56.34	46.84	40.73	72.71	49.91	44.53	80.51	62.9	28.34	40.88	47.98	53.3	75.03	56.51	59.23
Irf8	Endogenous	65.45	100.89	55.28	81.05	65.4	30.97	117.28	78.87	52.21	66.43	73.57	68.17	68.55	78.24	92.14
Irgm2	Endogenous	75.39	116.5	58.91	92.97	67.12	58.08	116.29	88.85	110.39	81.77	83.17	84.28	71.33	202.13	111.89
Isg15	Endogenous	54.68	93.68	44.37	65.56	61.95	49.37	123.25	62.9	52.21	54.17	51.18	55.77	87.07	121.71	116.27
Isg20	Endogenous	55.51	81.67	48	52.44	53.35	41.62	74.54	59.9	50.72	50.08	49.05	47.1	66.7	53.25	39.49
Itch	Endogenous	612.27	754.25	597.13	473.19	536.93	418.16	623.19	755.75	854.76	898.4	701.59	1193.58	741.98	898.7	910.45
Itga1	Endogenous	1467.3	2947.36	1589.2	939.24	1197.77	411.38	1511.77	2212.33	2950.63	2402.89	1503.41	2601.59	1614.58	2573.31	2801.55
Itga2	Endogenous	385.26	506.84	286.57	170.45	313.21	129.71	342.91	339.44	534.04	488.55	283.62	881.24	294.57	642.24	574.79
Itga2b	Endogenous	30.66	26.42	18.18	25.03	39.58	9.68	20.87	8.99	19.39	18.4	30.92	33.46	23.16	30.43	28.52
Itga4	Endogenous	574.16	905.59	416.76	270.57	247.81	132.61	456.21	528.12	669.78	640.84	480.88	632.12	577.1	524.88	550.66
Itga5	Endogenous	92.79	91.28	88.73	108.47	70.56	69.69	79.51	121.8	119.34	137.98	91.7	118.99	100.04	106.5	98.72
Itga6	Endogenous	925.45	640.16	797.15	967.84	965.45	738.55	940.26	842.6	895.04	709.32	834.87	623.44	600.26	679.19	737.13
Itgae	Endogenous	70.42	54.05	55.28	87.01	79.16	45.49	81.5	46.92	62.65	55.19	61.84	38.42	37.05	38.03	57.04
Itgal	Endogenous	49.71	52.85	32	71.52	41.3	34.85	83.49	42.93	62.65	53.15	59.71	32.23	29.64	28.25	37.3
Itgam	Endogenous	127.59	163.34	85.82	139.46	163.49	84.21	139.15	112.81	137.24	168.64	121.55	204.51	159.33	130.4	157.96
Itgax	Endogenous	25.68	57.65	42.91	57.21	48.19	27.1	67.59	22.96	23.87	27.6	40.52	28.51	28.72	38.03	21.94
Itgb1	Endogenous	4362.13	3454.2	3536.97	3188.4	3416.06	2323.11	4723.15	4997.72	6169.78	5537.59	3587.92	4952.81	4141.59	5010.79	6511.35
Itgb2	Endogenous	143.33	165.74	101.1	131.11	125.63	103.57	226.62	118.8	96.96	139	152.47	141.3	110.23	119.54	131.63
Itgb3	Endogenous	163.22	135.72	123.64	95.35	178.98	108.41	124.24	286.53	361	294.36	216.45	265.24	203.79	265.16	254.49
Itgb4	Endogenous	325.61	271.44	234.93	352.81	314.93	234.25	378.69	250.58	232.71	220.77	267.63	228.06	194.53	219.51	239.13
Itk	Endogenous	24.03	42.04	19.64	15.5	25.81	14.52	17.89	20.97	25.36	27.6	15.99	17.35	14.82	13.04	21.94
Jak1	Endogenous	815.26	589.71	669.86	773.56	781.3	636.92	878.63	766.73	763.76	839.12	805.02	1028.74	664.17	863.93	763.46
Jak2	Endogenous	337.21	224.6	258.93	305.13	309.77	243.93	421.43	269.55	265.53	242.23	343.33	428.85	281.6	428.16	399.28
Jak3	Endogenous	60.48	117.7	66.91	69.13	79.16	51.3	61.62	53.91	50.72	65.41	71.44	96.68	65.77	72.81	72.4
Jam3	Endogenous	256.01	189.76	161.47	139.46	204.79	79.37	374.71	275.54	423.65	392.48	178.06	302.42	176.93	308.62	302.75
Jun	Endogenous	322.29	130.91	220.38	313.48	333.86	303.94	372.72	372.38	326.69	263.69	270.83	133.86	284.38	331.44	245.71
Kdr	Endogenous	76.22	86.48	74.19	71.52	106.7	90.99	77.53	99.83	126.8	83.81	72.5	86.76	69.47	98.89	92.14
Kit	Endogenous	33.97	64.86	45.82	52.44	58.51	54.21	78.52	60.9	62.65	41.91	76.77	45.86	52.8	45.64	57.04
Klra1	Endogenous	14.91	20.42	10.91	10.73	22.37	2.9	10.93	14.98	17.9	22.49	8.53	8.68	4.63	5.43	10.97
Klra15	Endogenous	9.11	16.81	5.82	8.34	5.16	7.74	6.96	11.98	11.93	9.2	8.53	6.2	3.71	2.17	8.78
Klra17	Endogenous	24.86	28.83	18.18	29.8	25.81	12.58	19.88	26.96	40.28	25.55	13.86	14.87	19.45	26.08	13.16
Klra2	Endogenous	25.68	37.23	15.27	26.22	17.21	7.74	21.87	18.97	23.87	28.62	24.52	59.49	24.08	55.42	32.91
Klra20	Endogenous	17.4	28.83	13.09	28.61	17.21	12.58	23.85	29.95	40.28	27.6	19.19	13.63	14.82	15.21	13.16
Klra21	Endogenous	8.29	14.41	12.36	15.5	17.21	7.74	11.93	11.98	22.38	9.2	6.4	14.87	11.12	6.52	6.58
Klra27	Endogenous	8.29	20.42	10.18	11.92	15.49	1.94	8.95	8.99	17.9	8.18	6.4	6.2	12.97	5.43	6.58
Klra3	Endogenous	14.08	12.01	10.91	13.11	18.93	12.58	12.92	7.99	19.39	9.2	9.6	12.39	10.19	13.04	6.58
Klra4	Endogenous	11.6	36.03	24	47.68	24.09	16.46	20.87	27.95	38.78	36.79	11.73	13.63	14.82	16.3	24.13
Klra5	Endogenous	19.88	42.04	17.46	25.03	15.49	12.58	10.93	30.95	31.33	36.79	10.66	21.07	8.34	14.13	26.33
Klra6	Endogenous	24.03	40.84	18.91	27.41	32.7	3.87	17.89	31.95	41.77	26.57	19.19	28.51	17.6	10.87	21.94
Klra7	Endogenous	27.34	24.02	18.91	14.3	12.05	16.46	19.88	17.97	23.87	23.51	12.79	19.83	10.19	9.78	17.55
Klrb1	Endogenous	21.54	30.03	21.09	29.8	27.53	17.42	9.94	22.96	26.85	18.4	8.53	17.35	13.89	15.21	15.36
Klrb1c	Endogenous	21.54	25.22	16.73	22.65	20.65	19.36	22.86	16.97	17.9	22.49	10.66	12.39	13.89	16.3	15.36
Klrc1	Endogenous	22.37	31.23	20.37	25.03	17.21	12.58	35.78	22.96	29.83	31.68	19.19	19.83	13.89	17.39	15.36
Klrc2	Endogenous	21.54	20.42	15.27	16.69	13.77	14.52	17.89	14.98	22.38	19.42	6.4	8.68	6.48	10.87	2.19
Klrd1	Endogenous	54.68	86.48	35.64	45.29	51.63	38.72	58.64	23.96	32.82	37.82	37.32	30.99	29.64	46.73	57.04
Klrg1	Endogenous	30.66	45.64	16	19.07	18.93	6.78	13.92	25.96	44.75	25.55	12.79	9.92	11.12	17.39	17.55
Klrk1	Endogenous	38.94	74.46	29.09	30.99	27.53	33.88	68.58	23.96	34.31	27.6	25.59	16.11	18.53	14.13	21.94
Lag3	Endogenous	44.74	45.64	29.82	34.57	37.86	29.04	33.79	30.95	58.18	40.88	55.44	37.18	22.23	39.12	35.1
Lamp1	Endogenous	2270.96	2091.02	2032.87	2295.65	2133.96	2195.34	2860.53	2262.25	2213.72	1880.61	2448.1	2532.18	2340.82	2572.23	3025.32
Lamp2	Endogenous	1873.27	1779.95	1808.12	2183.61	1738.15	1882.69	2761.13	1458.58	1299.29	1102.82	1429.84	1080.79	1412.64	1330.12	1673.91
Lamp3	Endogenous	19.88	15.61	13.82	11.92	20.65	12.58	7.95	14.98	14.92	14.31	7.46	11.15	4.63	6.52	19.74
Lbp	Endogenous	314.84	241.41	190.56	264.61	201.35	190.69	614.25	230.62	205.86	246.32	125.82	158.65	158.4	115.19	144.79
Lck	Endogenous	26.51	43.24	31.27	32.18	30.98	25.17	66.59	24.96	23.87	21.46	24.52	23.55	22.23	14.13	28.52
Lcn2	Endogenous	144.16	188.56	274.93	252.69	120.47	32.91	261.4	86.86	32.82	20.44	102.36	34.7	16.67	146.7	193.06
Lcp1	Endogenous	412.6	586.11	336.75	476.77	548.98	372.67	578.47	267.56	267.02	402.7	317.74	268.96	331.62	260.81	307.14
Lgals3	Endogenous	2680.25	5034.77	3962.45	4838.03	3999.46	5028.56	4061.19	1378.71	402.77	564.18	2364.93	601.13	1672.01	881.32	1167.13
Lif	Endogenous	54.68	49.24	43.64	44.1	36.14	20.33	54.67	43.93	58.18	82.79	50.11	91.72	42.61	52.16	39.49
Lilra5	Endogenous	12.43	25.22	12.36	25.03	18.93	12.58	21.87	22.96	32.82	20.44	9.6	11.15	16.67	18.47	13.16
Litaf	Endogenous	458.17	240.21	339.66	414.79	356.23	309.75	655.99	408.32	407.24	385.32	341.2	281.35	315.88	408.6	381.73
Lrp1	Endogenous	2099.46	913.99	1140.44	1292.05	1872.38	982.48	1591.28	2302.18	2579.19	2521.46	1357.33	1976.91	1558.07	1557.25	1202.23
Lrrn3	Endogenous	47.23	85.27	81.46	44.1	91.21	43.56	44.73	80.87	156.63	126.74	69.31	197.07	50.02	123.88	184.28
Lta	Endogenous	15.74	21.62	16	23.84	18.93	7.74	13.92	12.98	10.44	10.22	12.79	6.2	4.63	7.61	10.97
Ltb	Endogenous	33.14	44.44	31.27	48.87	43.02	21.3	57.65	26.96	22.38	28.62	30.92	17.35	12.04	18.47	24.13
Ltbr	Endogenous	337.21	305.06	352.02	344.47	294.28	301.04	490.01	408.32	435.58	461.98	365.72	472.23	353.86	419.47	454.13
Ltf	Endogenous	20.71	26.42	15.27	25.03	25.81	8.71	12.92	24.96	28.34	22.49	11.73	17.35	13.89	11.95	21.94
Ltk	Endogenous	25.68	31.23	18.18	26.22	25.81	19.36	14.91	31.95	34.31	33.73	18.13	23.55	16.67	11.95	26.33
Ly86	Endogenous	201.33	130.91	80.01	236	172.09	95.83	237.55	151.75	147.68	142.07	154.61	173.52	243.62	181.48	171.12
Ly9	Endogenous	22.37	36.03	13.82	32.18	18.93	30.01	44.73	42.93	50.72	32.71	20.26	28.51	16.67	35.86	39.49
Ly96	Endogenous	120.13	186.16	100.37	125.15	118.74	96.8	121.26	112.81	110.39	107.32	88.5	112.79	96.34	79.33	103.11
Lyn	Endogenous	139.19	192.17	125.1	96.55	142.84	82.28	146.11	156.74	167.07	168.64	159.94	250.37	173.22	207.56	131.63
Lyve1	Endogenous	86.17	72.06	50.19	65.56	113.58	49.37	133.19	91.85	44.75	52.13	66.11	59.49	62.99	26.08	59.23
Lyz2	Endogenous	4372.08	13945.3	5078.17	5983.47	4496.81	4441.98	6250.82	4321.84	3614.45	5366.91	4371.61	4614.44	4964.16	3383.99	4826.47
Maf	Endogenous	123.45	136.92	101.1	148.99	134.23	132.61	83.49	141.77	123.81	102.21	155.67	127.66	222.32	119.54	100.92
Map2k1	Endogenous	485.51	452.79	488.03	405.25	390.65	321.36	702.71	482.2	519.12	454.82	392.38	463.55	381.64	496.62	491.42
Map2k2	Endogenous	468.11	419.16	469.12	410.02	416.47	391.06	473.11	400.34	393.82	409.85	472.35	516.85	427.96	415.12	370.76
Map2k4	Endogenous	410.12	302.66	412.39	469.62	239.21	340.72	465.16	208.65	195.42	212.59	310.28	190.87	248.25	179.31	182.09
Map3k1	Endogenous	114.34	141.72	131.65	115.62	120.47	128.74	104.36	157.74	162.6	172.73	152.47	184.68	162.11	135.84	129.44
Map3k5	Endogenous	101.08	87.68	95.28	137.07	117.02	143.26	84.48	136.77	114.86	97.1	210.05	182.2	188.04	131.49	118.47
Map3k7	Endogenous	270.1	154.93	178.19	176.41	211.68	172.3	236.56	215.64	196.91	227.92	259.1	270.2	218.61	234.73	232.55
Map4k2	Endogenous	47.23	67.26	49.46	42.91	55.07	43.56	48.7	57.9	71.6	70.52	76.77	83.04	45.39	59.77	46.07
Mapk1	Endogenous	709.21	1285.12	802.24	688.93	659.12	672.73	682.83	605	592.21	597.91	676	835.38	729.02	663.98	662.54
Mapk11	Endogenous	43.08	51.64	34.91	32.18	36.14	35.81	21.87	29.95	37.29	35.77	53.31	39.66	37.98	29.34	37.3
Mapk14	Endogenous	564.22	247.41	365.12	474.39	516.28	436.55	575.48	455.25	408.73	464.02	620.56	567.66	616.93	599.86	458.51
Mapk3	Endogenous	834.32	846.74	920.79	800.97	918.98	668.86	842.85	786.7	918.9	821.75	847.67	1271.67	655.84	910.66	820.5
Mapk8	Endogenous	176.47	279.84	213.83	146.61	166.93	129.71	153.07	162.73	256.58	218.72	212.18	328.45	262.15	264.07	265.46
Mapkapk2	Endogenous	347.15	194.57	270.56	411.21	390.65	360.08	384.65	324.46	340.11	306.62	356.13	273.92	355.71	298.84	287.39
Marco	Endogenous	18.23	19.22	15.27	17.88	22.37	9.68	11.93	18.97	11.93	22.49	5.33	13.63	13.89	10.87	6.58
Masp1	Endogenous	34.8	61.25	50.91	56.02	49.91	57.11	44.73	27.95	28.34	23.51	35.19	7.44	25.01	18.47	19.74
Masp2	Endogenous	18.23	10.81	11.64	19.07	10.33	8.71	3.98	10.98	16.41	14.31	6.4	8.68	9.26	11.95	8.78
Mavs	Endogenous	106.05	88.88	84.37	88.2	104.98	86.15	86.47	110.82	74.59	95.05	97.03	138.82	87.07	111.93	72.4
Mbl2	Endogenous	10.77	12.01	10.18	15.5	20.65	7.74	5.96	18.97	23.87	9.2	11.73	11.15	11.12	9.78	13.16
Mcam	Endogenous	2604.85	1637.02	1547.74	1140.67	1474.84	627.24	2073.34	2582.72	3596.55	3859.35	2313.75	3827.4	2227.81	3710	3312.72
Mef2c	Endogenous	572.5	781.88	482.94	375.46	538.65	420.1	597.35	620.97	738.4	619.38	593.9	1074.6	504.85	946.52	947.74
Mefv	Endogenous	20.71	27.62	10.91	13.11	15.49	15.49	20.87	9.98	23.87	18.4	9.6	17.35	15.75	18.47	10.97
Mertk	Endogenous	132.56	104.49	88.73	91.78	127.35	81.31	138.16	103.83	153.65	128.78	208.98	400.34	167.66	282.54	197.45
Mfge8	Endogenous	177.3	182.56	204.38	182.36	237.49	174.23	404.53	161.73	141.71	127.76	149.27	112.79	78.74	108.67	151.38
Mif	Endogenous	586.59	559.69	943.34	876.07	740	683.38	760.36	605	401.27	360.79	619.49	312.34	532.64	379.26	436.58
Mill2	Endogenous	114.34	308.67	139.65	112.04	84.33	60.98	113.31	166.72	195.42	134.91	147.14	158.65	110.23	189.09	146.99
Mme	Endogenous	70.42	103.29	48	54.83	86.05	73.57	39.76	54.91	35.8	25.55	44.78	30.99	43.54	47.81	48.26
Mmp9	Endogenous	38.94	55.25	53.82	59.6	37.86	18.39	81.5	33.94	46.24	56.21	53.31	42.14	30.57	45.64	85.56
Mnx1	Endogenous	6.63	12.01	5.09	5.96	8.6	3.87	9.94	4.99	13.43	13.29	6.4	3.72	6.48	2.17	6.58
Mpo	Endogenous	14.08	16.81	17.46	11.92	12.05	11.62	10.93	16.97	25.36	18.4	8.53	16.11	12.04	13.04	35.1
Mpped1	Endogenous	9.94	18.02	8.73	19.07	8.6	7.74	7.95	11.98	19.39	16.35	7.46	8.68	4.63	7.61	13.16
Mr1	Endogenous	166.53	199.37	148.37	174.02	189.3	129.71	242.52	168.72	234.2	186.02	107.69	152.45	114.86	169.53	164.54
Mrc1	Endogenous	588.25	429.97	263.29	535.17	528.33	386.22	548.65	429.29	349.06	474.24	353.99	458.59	696.59	335.79	419.03
Ms4a1	Endogenous	28.17	45.64	20.37	51.25	36.14	17.42	24.85	28.95	62.65	28.62	17.06	30.99	19.45	19.56	19.74
Ms4a2	Endogenous	58	46.84	24	16.69	48.19	25.17	18.88	25.96	35.8	30.66	44.78	21.07	37.05	41.29	26.33
Msln	Endogenous	19.06	20.42	15.27	15.5	20.65	7.74	10.93	16.97	26.85	26.57	9.6	13.63	6.48	9.78	4.39
Msr1	Endogenous	63.8	61.25	42.91	51.25	44.74	38.72	59.64	44.93	34.31	53.15	31.99	50.82	61.14	49.99	52.65
Mst1r	Endogenous	53.02	56.45	54.55	57.21	48.19	41.62	54.67	34.94	44.75	48.04	75.7	58.25	44.46	40.21	43.88
Muc1	Endogenous	31.48	42.04	27.64	17.88	25.81	19.36	28.82	27.95	49.23	31.68	14.93	21.07	25.01	23.91	30.71
Mx1	Endogenous	17.4	15.61	8	8.34	15.49	8.71	13.92	14.98	14.92	11.24	21.32	4.96	8.34	10.87	6.58
Mx2	Endogenous	27.34	44.44	30.55	36.95	46.47	15.49	24.85	26.96	43.26	33.73	33.05	49.58	30.57	42.38	28.52
Myc	Endogenous	306.55	227	330.93	359.96	339.02	416.22	401.55	236.61	149.17	168.64	296.42	135.1	209.35	194.52	208.42
Myd88	Endogenous	130.08	56.45	80.01	119.19	110.14	78.4	157.04	83.86	120.83	96.07	89.56	68.17	89.85	68.46	105.3
Ncam1	Endogenous	569.19	518.85	400.75	334.93	314.93	178.1	770.29	926.46	1212.77	1097.71	508.6	779.61	571.54	841.11	728.36
Ncf4	Endogenous	108.54	175.35	73.46	101.31	98.09	69.69	100.39	79.87	85.03	111.41	107.69	109.07	123.2	97.8	103.11
Ncr1	Endogenous	11.6	16.81	9.46	14.3	6.88	12.58	23.85	17.97	8.95	11.24	11.73	8.68	6.48	14.13	4.39
Nefl	Endogenous	18.23	16.81	9.46	10.73	8.6	11.62	13.92	13.98	13.43	7.15	10.66	11.15	8.34	4.35	2.19
Nfatc1	Endogenous	123.45	123.71	94.55	85.82	96.37	82.28	78.52	86.86	113.37	100.16	130.08	126.42	84.3	98.89	63.62
Nfatc2	Endogenous	302.41	234.2	227.65	150.18	357.95	158.75	275.32	206.66	337.13	330.13	573.64	1643.5	265.85	1089.96	789.79
Nfatc3	Endogenous	116.82	96.08	72	115.62	129.07	125.84	89.45	91.85	89.5	78.7	88.5	80.56	87.07	80.42	92.14
Nfatc4	Endogenous	85.34	94.88	66.19	63.17	87.77	50.33	64.61	53.91	76.08	68.48	83.17	90.48	66.7	64.12	37.3
Nfkb1	Endogenous	261.81	168.15	203.65	263.42	180.7	195.53	299.17	195.68	179.01	172.73	226.04	214.42	206.57	191.26	225.97
Nfkb2	Endogenous	254.35	464.8	320.02	258.65	301.16	217.79	264.39	185.69	214.81	206.46	330.54	272.68	271.41	283.63	304.95
Nfkbia	Endogenous	133.39	98.49	95.28	126.34	177.26	134.55	110.33	72.88	80.55	105.27	135.41	147.49	86.15	141.27	111.89
Nlrc5	Endogenous	124.28	235.4	125.1	207.4	103.26	117.12	165.99	62.9	61.16	45.99	206.85	97.92	129.69	234.73	173.31
Nlrp3	Endogenous	12.43	54.05	20.37	20.26	10.33	6.78	27.83	26.96	28.34	18.4	18.13	24.79	20.38	26.08	21.94
Nod1	Endogenous	111.02	180.16	138.92	133.5	122.19	102.6	98.4	145.76	141.71	154.33	180.2	210.71	156.55	163.01	127.24
Nod2	Endogenous	37.28	55.25	32.73	40.53	34.42	30.97	36.78	42.93	38.78	49.06	27.72	29.75	18.53	27.17	21.94
Nos2	Endogenous	15.74	30.03	15.27	19.07	24.09	13.55	30.81	25.96	20.88	33.73	12.79	21.07	12.04	3.26	17.55
Notch1	Endogenous	491.31	375.93	421.85	370.69	473.26	585.62	392.6	612.98	542.99	519.21	654.67	541.64	832.76	582.47	541.88
Nrp1	Endogenous	578.3	208.98	247.29	309.9	296	177.14	546.66	635.95	732.44	543.74	384.91	498.26	447.41	457.5	449.74
Nt5e	Endogenous	136.71	132.11	151.28	177.6	141.12	156.81	174.93	138.77	146.19	123.67	114.09	214.42	126.91	177.13	195.25
Nup107	Endogenous	166.53	122.51	172.38	165.68	196.19	159.71	180.9	172.71	167.07	181.93	177	206.99	235.29	207.56	149.18
Oas2	Endogenous	86.17	91.28	49.46	72.71	75.72	44.53	58.64	90.85	92.49	52.13	95.96	140.06	145.43	102.15	68.01
Oas3	Endogenous	30.66	37.23	25.46	39.33	32.7	29.04	22.86	40.93	50.72	32.71	14.93	11.15	22.23	23.91	21.94
Oasl1	Endogenous	24.86	33.63	19.64	34.57	41.3	29.04	27.83	31.95	28.34	26.57	24.52	30.99	49.1	19.56	15.36
Osm	Endogenous	42.25	45.64	19.64	25.03	53.35	27.1	37.77	28.95	40.28	34.75	35.19	30.99	35.2	23.91	32.91
Pax5	Endogenous	24.86	28.83	19.64	28.61	29.26	12.58	11.93	20.97	19.39	28.62	17.06	22.31	24.08	23.91	15.36
Pdcd1	Endogenous	19.06	34.83	18.18	14.3	29.26	14.52	15.9	15.97	22.38	12.26	13.86	9.92	10.19	18.47	10.97
Pdcd1lg2	Endogenous	31.48	36.03	22.55	32.18	25.81	9.68	25.84	17.97	29.83	17.38	14.93	17.35	17.6	9.78	4.39
Pdgfc	Endogenous	96.94	88.88	61.1	108.47	92.93	72.6	92.44	65.89	40.28	56.21	89.56	61.97	68.55	56.51	63.62
Pdgfrb	Endogenous	232.81	305.06	223.29	121.58	137.67	72.6	125.24	188.69	252.1	243.25	157.8	250.37	138.95	172.79	114.08
Pecam1	Endogenous	212.93	86.48	136.74	252.69	277.07	224.57	209.72	228.62	235.69	187.04	150.34	179.72	166.74	174.96	164.54
Pik3cd	Endogenous	130.08	123.71	70.55	70.32	103.26	55.17	122.25	92.85	101.44	93.01	109.82	145.01	115.79	107.58	72.4
Pik3cg	Endogenous	70.42	81.67	35.64	61.98	86.05	48.4	60.63	46.92	77.57	76.66	50.11	60.73	49.1	41.29	63.62
Pin1	Endogenous	41.43	32.43	27.64	20.26	29.26	24.2	22.86	27.95	47.74	36.79	76.77	83.04	67.62	97.8	50.46
Pla2g1b	Endogenous	9.94	18.02	7.27	14.3	5.16	6.78	15.9	6.99	16.41	14.31	8.53	8.68	9.26	7.61	2.19
Pla2g6	Endogenous	69.6	79.27	48.73	58.4	55.07	49.37	62.62	65.89	68.62	59.28	92.76	81.8	89.85	69.55	59.23
Plau	Endogenous	284.18	431.17	357.84	382.61	197.91	215.86	338.93	329.45	314.75	280.05	290.02	353.24	361.27	256.46	344.43
Plaur	Endogenous	140.85	301.46	174.56	156.14	135.95	82.28	204.75	126.79	137.24	153.31	147.14	107.83	103.75	132.58	142.6
Pmch	Endogenous	9.94	25.22	13.82	8.34	22.37	1.94	11.93	7.99	22.38	13.29	12.79	7.44	7.41	5.43	13.16
Pml	Endogenous	176.47	74.46	96.73	112.04	106.7	111.32	151.08	178.7	170.06	185	198.32	219.38	209.35	171.7	149.18
Pnma1	Endogenous	11.6	20.42	12.36	7.15	15.49	7.74	9.94	13.98	11.93	10.22	25.59	17.35	10.19	6.52	13.16
Pou2af1	Endogenous	14.91	13.21	8	11.92	17.21	3.87	5.96	20.97	17.9	8.18	7.46	9.92	9.26	3.26	10.97
Pou2f2	Endogenous	33.14	31.23	18.18	28.61	22.37	17.42	17.89	33.94	46.24	41.91	35.19	40.9	41.68	33.69	32.91
Pparg	Endogenous	49.71	74.46	34.91	42.91	74	38.72	34.79	23.96	34.31	37.82	22.39	23.55	35.2	26.08	19.74
Ppbp	Endogenous	33.97	44.44	26.18	36.95	49.91	22.26	33.79	49.92	61.16	44.97	20.26	39.66	23.16	21.73	24.13
Prdm1	Endogenous	62.97	56.45	73.46	70.32	34.42	77.44	72.56	54.91	23.87	15.33	54.38	14.87	47.24	17.39	19.74
Prf1	Endogenous	7.46	4.8	5.82	17.88	10.33	8.71	11.93	7.99	8.95	12.26	7.46	2.48	4.63	4.35	4.39
Prg2	Endogenous	13.26	24.02	12.36	17.88	13.77	7.74	21.87	16.97	34.31	26.57	27.72	29.75	7.41	26.08	30.71
Prkcd	Endogenous	372	251.02	242.93	342.08	283.95	342.66	328	231.62	176.02	209.53	406.24	317.3	378.87	302.1	265.46
Prkce	Endogenous	142.5	139.32	93.82	91.78	120.47	74.53	124.24	165.73	190.94	198.28	180.2	228.06	162.11	216.25	173.31
Psen1	Endogenous	340.52	159.74	224.02	340.89	268.47	302	401.55	266.56	204.37	196.24	297.48	187.16	219.54	193.43	199.64
Psen2	Endogenous	148.3	227	178.92	148.99	216.84	177.14	205.74	219.64	187.96	238.14	250.57	262.76	132.46	243.42	250.1
Psma2	Endogenous	799.52	1277.91	989.16	871.3	779.58	901.17	1056.55	751.75	639.95	680.7	736.78	768.45	770.7	812.85	868.77
Psmb10	Endogenous	138.36	210.18	141.83	139.46	151.44	91.96	179.9	157.74	198.4	152.29	115.15	122.7	126.91	178.22	98.72
Psmb7	Endogenous	626.36	447.99	558.58	767.6	743.44	862.45	753.4	577.04	460.94	433.36	536.32	390.42	491.88	468.37	473.87
Psmb8	Endogenous	303.24	399.95	362.93	461.28	366.56	301.04	651.02	242.6	195.42	234.05	285.75	235.49	216.76	474.89	337.85
Psmb9	Endogenous	115.16	265.43	175.28	203.82	134.23	124.87	163	107.82	120.83	108.34	108.76	88	104.67	171.7	127.24
Psmd7	Endogenous	659.5	1037.7	810.96	771.18	803.68	843.09	716.62	766.73	689.18	733.85	761.3	1031.22	897.61	1028.02	1055.24
Ptgdr2	Endogenous	19.88	45.64	20.37	26.22	22.37	16.46	15.9	31.95	49.23	43.95	12.79	22.31	22.23	19.56	28.52
Ptgs2	Endogenous	32.31	16.81	26.18	32.18	15.49	23.23	99.39	26.96	19.39	16.35	12.79	19.83	24.08	20.65	15.36
Ptprc	Endogenous	202.99	199.37	119.28	205.01	189.3	157.78	218.66	126.79	120.83	177.84	187.66	268.96	217.69	220.6	263.26
Pvr	Endogenous	90.31	103.29	83.64	82.24	51.63	58.08	132.19	119.8	125.3	133.89	92.76	128.9	91.71	115.19	105.3
Pvrl2	Endogenous	178.96	81.67	146.19	141.84	165.21	206.18	195.8	153.75	177.52	145.13	183.39	135.1	200.09	135.84	136.02
Pycard	Endogenous	46.4	49.24	34.18	39.33	37.86	48.4	30.81	33.94	31.33	33.73	65.04	44.62	39.83	53.25	32.91
Raet1	Endogenous	33.14	34.83	24.73	30.99	37.86	29.04	26.84	42.93	40.28	66.43	30.92	29.75	36.13	22.82	43.88
Rag1	Endogenous	16.57	30.03	13.82	15.5	15.49	7.74	12.92	17.97	22.38	11.24	14.93	17.35	12.97	5.43	19.74
Rel	Endogenous	138.36	150.13	125.83	103.7	125.63	90.99	125.24	85.86	71.6	88.92	120.49	116.51	82.44	97.8	100.92
Rela	Endogenous	191.39	336.29	232.74	159.72	160.05	126.8	245.5	187.69	249.12	226.9	216.45	211.94	164.89	236.9	173.31
Relb	Endogenous	120.96	123.71	116.37	143.03	125.63	105.51	147.1	79.87	80.55	76.66	159.94	130.14	123.2	129.32	155.76
Reps1	Endogenous	143.33	130.91	129.46	147.8	153.16	167.46	131.2	166.72	152.16	117.54	249.5	223.1	233.43	171.7	166.73
Ripk2	Endogenous	79.54	132.11	73.46	83.43	74	58.08	61.62	46.92	52.21	33.73	58.64	43.38	58.36	52.16	92.14
Rora	Endogenous	516.99	258.22	341.84	581.66	554.14	597.23	439.32	244.59	258.07	219.75	401.97	278.87	316.8	221.69	234.74
Rorc	Endogenous	61.31	40.84	50.19	95.35	125.63	151	36.78	46.92	25.36	32.71	107.69	60.73	95.41	41.29	39.49
Rps6	Endogenous	149.13	172.95	135.28	179.98	184.14	201.34	162.01	136.77	150.66	124.69	158.87	147.49	182.49	143.44	184.28
Rrad	Endogenous	81.19	58.85	51.64	46.49	30.98	31.94	59.64	80.87	125.3	136.96	72.5	138.82	87.07	164.09	155.76
Rsad2	Endogenous	39.77	64.86	36.37	79.86	37.86	40.65	62.62	60.9	74.59	52.13	30.92	45.86	43.54	41.29	46.07
Runx1	Endogenous	240.27	320.68	255.29	327.78	191.02	201.34	301.16	246.59	132.76	163.53	264.43	183.44	181.56	191.26	206.22
Runx3	Endogenous	15.74	30.03	19.64	15.5	20.65	11.62	23.85	13.98	17.9	13.29	17.06	8.68	16.67	15.21	8.78
S100a8	Endogenous	4362.96	13413.2	12835.1	12698.8	588.56	96.8	19267.3	187.69	89.5	1274.53	1964.02	912.23	247.33	2893.89	9786.77
S100b	Endogenous	393.54	524.86	432.03	226.47	313.21	167.46	689.79	692.85	875.64	605.07	663.2	1150.2	346.44	1239.93	1072.79
Saa1	Endogenous	14.08	14.41	9.46	13.11	10.33	7.74	16.9	17.97	14.92	18.4	4.26	12.39	7.41	5.43	10.97
Sbno2	Endogenous	152.45	147.73	165.1	168.06	99.81	106.48	183.88	101.83	70.11	136.96	194.06	197.07	142.65	141.27	168.93
Sele	Endogenous	14.08	19.22	18.91	14.3	22.37	16.46	15.9	12.98	16.41	9.2	7.46	16.11	12.04	11.95	17.55
Sell	Endogenous	49.71	91.28	34.18	34.57	61.95	22.26	64.61	36.94	55.19	82.79	53.31	61.97	40.76	55.42	59.23
Selplg	Endogenous	164.87	127.31	97.46	172.83	187.58	123.9	237.55	117.8	85.03	112.43	181.26	128.9	125.98	117.36	109.69
Serpinb2	Endogenous	580.79	594.52	464.76	491.07	185.86	359.11	542.69	62.9	55.19	52.13	170.6	70.65	131.54	70.64	109.69
Serping1	Endogenous	1601.52	3592.32	1659.02	1292.05	1576.38	1049.27	2187.64	1428.63	2136.15	1640.43	872.19	1753.81	1277.4	1411.63	1153.97
Sh2b2	Endogenous	37.28	42.04	32.73	33.37	53.35	47.43	39.76	37.94	38.78	34.75	28.79	39.66	45.39	36.95	46.07
Sh2d1a	Endogenous	24.03	26.42	21.09	28.61	25.81	16.46	22.86	19.97	29.83	38.84	10.66	17.35	11.12	8.69	4.39
Sh2d1b1	Endogenous	43.08	58.85	27.64	64.36	43.02	22.26	31.81	40.93	74.59	42.93	24.52	35.94	16.67	35.86	28.52
Sigirr	Endogenous	25.68	28.83	24.73	20.26	18.93	18.39	27.83	27.95	13.43	19.42	31.99	18.59	24.08	16.3	30.71
Siglec1	Endogenous	87.82	61.25	32.73	92.97	67.12	51.3	66.59	109.82	83.54	77.68	70.37	89.24	149.14	77.16	57.04
Slamf1	Endogenous	6.63	15.61	7.27	16.69	17.21	4.84	8.95	11.98	14.92	12.26	12.79	9.92	10.19	8.69	24.13
Slamf6	Endogenous	13.26	32.43	13.82	13.11	29.26	14.52	19.88	20.97	20.88	14.31	11.73	8.68	10.19	11.95	19.74
Slamf7	Endogenous	38.94	57.65	37.09	53.64	72.28	47.43	70.57	54.91	34.31	45.99	50.11	29.75	26.86	28.25	46.07
Slc11a1	Endogenous	23.2	22.82	10.18	26.22	20.65	16.46	45.72	34.94	32.82	24.53	20.26	29.75	21.31	21.73	26.33
Slc7a11	Endogenous	32.31	54.05	33.46	48.87	43.02	25.17	45.72	45.92	64.14	31.68	25.59	17.35	31.49	34.77	37.3
Smad2	Endogenous	204.64	140.52	135.28	141.84	175.54	131.64	199.78	181.7	190.94	164.55	210.05	213.18	176.93	202.13	190.87
Smad3	Endogenous	334.72	306.27	229.83	195.48	321.82	195.53	256.43	427.29	477.35	527.39	350.79	523.04	378.87	404.25	324.69
Smad4	Endogenous	459	753.05	490.22	393.34	380.33	394.93	486.03	511.15	447.52	442.56	448.89	583.78	442.78	497.71	427.8
Smn1	Endogenous	216.24	157.34	202.2	200.24	161.77	215.86	198.79	211.65	193.92	215.66	203.65	214.42	239.92	246.68	232.55
Smpd3	Endogenous	196.36	140.52	215.29	226.47	148	137.45	268.36	78.87	56.69	57.24	162.07	88	85.22	28.25	61.43
Snai1	Endogenous	39.77	126.11	53.82	36.95	55.07	35.81	18.88	31.95	49.23	70.52	25.59	44.62	30.57	26.08	30.71
Socs1	Endogenous	62.14	69.66	61.82	61.98	70.56	56.14	120.27	46.92	34.31	31.68	54.38	37.18	45.39	69.55	32.91
Socs3	Endogenous	48.88	75.67	45.82	70.32	46.47	50.33	63.61	52.91	73.09	68.48	54.38	50.82	46.32	94.54	61.43
Spink5	Endogenous	57.17	54.05	51.64	79.86	58.51	51.3	44.73	17.97	11.93	21.46	31.99	9.92	19.45	18.47	19.74
Spn	Endogenous	53.85	60.05	50.19	46.49	49.91	31.94	64.61	27.95	44.75	28.62	35.19	16.11	30.57	19.56	37.3
Spp1	Endogenous	153.28	391.54	384.75	438.63	123.91	102.6	665.93	330.45	267.02	268.81	203.65	195.83	61.14	404.25	491.42
St6gal1	Endogenous	333.06	269.03	229.83	237.19	320.09	161.65	448.26	450.25	554.92	466.07	335.87	382.99	291.79	439.03	487.03
Stat1	Endogenous	108.54	134.52	88.01	96.55	74	68.73	135.17	87.85	65.64	67.46	107.69	96.68	89.85	146.7	74.59
Stat2	Endogenous	154.1	133.32	94.55	120.38	129.07	102.6	193.82	123.79	107.4	108.34	171.67	185.92	163.03	190.17	151.38
Stat3	Endogenous	864.97	453.99	752.05	930.89	605.77	574	1219.55	647.93	528.07	617.33	691.99	675.5	488.17	670.5	702.03
Stat4	Endogenous	15.74	30.03	13.82	15.5	24.09	13.55	25.84	27.95	17.9	22.49	17.06	17.35	13.89	9.78	13.16
Stat5b	Endogenous	170.67	257.02	173.1	146.61	225.44	160.68	207.73	168.72	220.78	212.59	233.51	214.42	152.84	243.42	245.71
Stat6	Endogenous	372	380.73	332.39	319.44	309.77	307.81	413.47	281.53	292.38	282.09	371.05	344.56	316.8	297.76	276.43
Syk	Endogenous	104.39	64.86	44.37	76.28	80.88	63.89	96.41	75.87	80.55	84.83	68.24	92.96	96.34	55.42	63.62
Syt17	Endogenous	19.88	34.83	16	46.49	24.09	21.3	23.85	35.94	37.29	30.66	17.06	18.59	14.82	19.56	21.94
Tab1	Endogenous	158.25	102.09	98.19	114.42	151.44	113.25	160.02	167.72	168.56	142.07	232.44	219.38	179.71	195.61	175.51
Tal1	Endogenous	31.48	45.64	21.82	21.45	20.65	27.1	13.92	32.95	31.33	21.46	20.26	19.83	26.86	29.34	21.94
Tank	Endogenous	180.62	303.86	186.92	158.53	115.3	162.62	188.85	140.77	155.14	127.76	148.21	193.35	153.77	164.09	173.31
Tap1	Endogenous	195.53	158.54	211.65	340.89	228.88	223.6	374.71	149.75	134.26	107.32	260.16	122.7	168.59	262.98	146.99
Tap2	Endogenous	73.74	196.97	127.28	116.81	111.86	69.69	111.32	94.84	105.91	117.54	166.33	132.62	90.78	119.54	133.82
Tapbp	Endogenous	132.56	198.17	157.1	182.36	154.88	151.97	274.32	140.77	149.17	116.52	170.6	135.1	120.42	147.79	118.47
Tbk1	Endogenous	110.19	150.13	130.19	131.11	117.02	97.76	134.18	140.77	150.66	132.87	157.8	168.56	154.7	171.7	149.18
Tbx21	Endogenous	41.43	49.24	25.46	50.06	36.14	22.26	22.86	41.93	52.21	37.82	23.46	29.75	20.38	34.77	24.13
Tcf7	Endogenous	119.31	64.86	72.73	95.35	103.26	107.44	123.25	108.82	93.98	101.19	103.43	53.3	113.01	77.16	83.37
Tdo2	Endogenous	19.88	25.22	13.09	9.54	18.93	11.62	7.95	13.98	11.93	20.44	10.66	13.63	11.12	8.69	8.78
Tek	Endogenous	48.88	50.44	47.28	64.36	75.72	53.24	57.65	71.88	58.18	45.99	41.58	64.45	49.1	33.69	37.3
Tfe3	Endogenous	131.73	88.88	121.46	134.69	104.98	109.38	137.16	110.82	122.32	107.32	146.08	132.62	139.87	110.84	70.2
Tfeb	Endogenous	80.37	162.14	105.46	114.42	123.91	103.57	104.36	120.8	135.75	148.2	156.74	171.04	126.91	158.66	160.15
Tfrc	Endogenous	298.27	650.97	379.66	334.93	234.05	286.52	345.89	192.68	110.39	127.76	323.07	159.89	301.98	155.4	215
Tgfb1	Endogenous	628.84	1202.24	678.59	489.88	605.77	341.69	693.76	520.14	577.3	576.45	536.32	571.38	433.52	498.8	506.78
Tgfb2	Endogenous	115.16	100.89	92.37	118	120.47	53.24	146.11	160.73	181.99	193.17	109.82	195.83	91.71	164.09	175.51
Tgfb3	Endogenous	91.97	104.49	91.64	126.34	84.33	69.69	134.18	136.77	122.32	119.58	141.81	172.28	108.38	159.75	131.63
Tgfbr1	Endogenous	222.04	219.79	210.2	168.06	199.63	151.97	233.57	223.63	234.2	200.33	204.72	262.76	234.36	239.07	232.55
Tgfbr2	Endogenous	1530.27	1068.93	931.7	822.43	1268.33	647.57	1836.78	1570.4	1784.1	1678.24	1176.07	2226.04	1082.87	1690.91	1443.55
Thbd	Endogenous	583.27	510.44	446.58	266.99	344.19	121	598.35	443.27	502.71	400.65	283.62	350.76	297.35	379.26	346.63
Thbs1	Endogenous	444.08	563.29	499.67	342.08	351.07	271.03	534.73	391.35	443.04	420.07	424.37	391.66	394.61	433.59	254.49
Thy1	Endogenous	1647.09	1245.48	1339.73	1585.26	1261.45	1233.18	1340.81	1914.83	1463.38	1614.88	1002.27	514.37	1361.69	922.61	987.23
Ticam1	Endogenous	66.28	70.86	44.37	53.64	63.67	43.56	54.67	64.89	86.52	83.81	61.84	65.69	42.61	65.2	37.3
Ticam2	Endogenous	52.2	58.85	30.55	45.29	55.07	33.88	46.71	48.92	31.33	54.17	47.98	34.7	43.54	31.51	43.88
Tie1	Endogenous	73.74	57.65	72	81.05	141.12	75.5	66.59	111.81	96.96	100.16	78.9	126.42	78.74	70.64	85.56
Tigit	Endogenous	46.4	56.45	37.82	75.09	48.19	22.26	41.75	40.93	53.7	52.13	22.39	21.07	20.38	34.77	24.13
Timd4	Endogenous	19.06	19.22	11.64	21.45	17.21	13.55	14.91	21.96	20.88	19.42	12.79	16.11	8.34	7.61	13.16
Tirap	Endogenous	53.85	51.64	48	50.06	67.12	52.27	49.7	60.9	61.16	69.5	56.51	68.17	45.39	47.81	37.3
Tlr1	Endogenous	61.31	80.47	29.09	35.76	34.42	33.88	56.65	47.92	65.64	78.7	63.97	58.25	57.43	66.29	50.46
Tlr2	Endogenous	21.54	27.62	24	28.61	22.37	11.62	34.79	19.97	32.82	27.6	17.06	24.79	23.16	14.13	17.55
Tlr3	Endogenous	70.42	40.84	40	44.1	61.95	43.56	68.58	83.86	80.55	62.35	52.25	79.32	37.98	66.29	46.07
Tlr4	Endogenous	141.68	118.9	77.1	64.36	104.98	60.01	147.1	110.82	134.26	141.05	86.37	83.04	103.75	95.63	142.6
Tlr5	Endogenous	32.31	32.43	22.55	34.57	39.58	22.26	13.92	31.95	31.33	30.66	22.39	18.59	22.23	13.04	8.78
Tlr6	Endogenous	25.68	28.83	17.46	22.65	30.98	11.62	35.78	24.96	31.33	28.62	27.72	28.51	33.35	23.91	30.71
Tlr7	Endogenous	45.57	64.86	28.37	42.91	48.19	31.94	32.8	36.94	62.65	37.82	34.12	57.01	50.95	34.77	37.3
Tlr8	Endogenous	111.85	74.46	51.64	77.48	43.02	59.05	71.56	95.84	83.54	95.05	50.11	79.32	79.66	67.38	52.65
Tlr9	Endogenous	56.34	74.46	37.82	89.39	55.07	37.75	31.81	75.87	74.59	77.68	26.66	33.46	43.54	41.29	50.46
Tmed1	Endogenous	141.68	176.55	139.65	116.81	170.37	119.06	127.22	179.7	220.78	196.24	130.08	162.37	130.61	154.31	182.09
Tmem173	Endogenous	59.65	81.67	46.55	65.56	67.12	31.94	71.56	49.92	77.57	61.32	51.18	64.45	75.03	70.64	63.62
Tnf	Endogenous	26.51	40.84	19.64	36.95	30.98	17.42	31.81	19.97	31.33	20.44	19.19	26.03	16.67	23.91	35.1
Tnfaip3	Endogenous	82.02	124.91	87.28	123.96	89.49	87.12	88.46	63.89	40.28	44.97	82.1	55.77	76.88	83.68	70.2
Tnfrsf10b	Endogenous	43.08	99.69	49.46	53.64	48.19	42.59	45.72	49.92	38.78	53.15	59.71	50.82	46.32	51.08	30.71
Tnfrsf11a	Endogenous	56.34	49.24	33.46	64.36	63.67	30.97	52.68	31.95	37.29	54.17	66.11	63.21	59.28	46.73	37.3
Tnfrsf11b	Endogenous	48.05	60.05	32	28.61	51.63	37.75	54.67	35.94	19.39	22.49	40.52	21.07	35.2	24.99	32.91
Tnfrsf12a	Endogenous	444.91	349.5	374.57	371.88	240.93	316.52	539.7	271.55	176.02	267.78	348.66	187.16	275.12	277.11	381.73
Tnfrsf13b	Endogenous	20.71	36.03	16	20.26	22.37	8.71	16.9	35.94	23.87	26.57	20.26	8.68	19.45	11.95	19.74
Tnfrsf13c	Endogenous	15.74	26.42	11.64	14.3	37.86	12.58	8.95	16.97	17.9	20.44	8.53	11.15	14.82	15.21	26.33
Tnfrsf14	Endogenous	133.39	181.36	138.19	109.66	113.58	65.82	184.87	225.63	305.8	310.71	234.57	373.07	187.12	319.49	217.19
Tnfrsf17	Endogenous	24.03	22.82	10.18	25.03	20.65	14.52	16.9	17.97	20.88	20.44	15.99	16.11	16.67	15.21	21.94
Tnfrsf18	Endogenous	58.82	58.85	50.19	58.4	68.84	54.21	48.7	22.96	19.39	19.42	42.65	27.27	28.72	14.13	54.85
Tnfrsf1a	Endogenous	797.86	1769.14	1042.25	896.33	753.77	779.21	980.01	804.67	1006.91	1101.8	694.13	1052.29	710.49	894.36	833.66
Tnfrsf1b	Endogenous	124.28	254.62	148.37	132.3	120.47	90.99	173.94	146.76	198.4	263.69	164.2	226.82	169.52	176.05	221.58
Tnfrsf4	Endogenous	37.28	60.05	38.55	32.18	20.65	37.75	44.73	17.97	20.88	4.09	30.92	12.39	12.04	14.13	24.13
Tnfrsf8	Endogenous	15.74	21.62	9.46	25.03	12.05	11.62	19.88	17.97	22.38	17.38	5.33	1.24	6.48	4.35	8.78
Tnfrsf9	Endogenous	28.17	50.44	28.37	30.99	22.37	17.42	17.89	27.95	41.77	27.6	9.6	27.27	17.6	16.3	17.55
Tnfsf10	Endogenous	26.51	24.02	16	32.18	20.65	28.07	40.75	39.93	28.34	28.62	29.85	27.27	20.38	11.95	13.16
Tnfsf11	Endogenous	19.88	33.63	12.36	21.45	22.37	8.71	22.86	12.98	35.8	20.44	18.13	17.35	11.12	9.78	13.16
Tnfsf12	Endogenous	118.48	54.05	48	78.67	84.33	66.79	139.15	142.76	149.17	111.41	121.55	138.82	92.63	149.96	138.21
Tnfsf13	Endogenous	26.51	16.81	15.27	19.07	17.21	12.58	33.79	28.95	37.29	18.4	23.46	48.34	29.64	34.77	41.68
Tnfsf13b	Endogenous	17.4	18.02	15.27	21.45	22.37	5.81	12.92	12.98	23.87	20.44	12.79	19.83	19.45	11.95	10.97
Tnfsf14	Endogenous	46.4	49.24	25.46	59.6	39.58	17.42	36.78	40.93	58.18	62.35	29.85	42.14	23.16	27.17	35.1
Tnfsf15	Endogenous	9.94	32.43	21.82	19.07	34.42	13.55	14.91	19.97	20.88	19.42	17.06	14.87	12.97	4.35	24.13
Tnfsf18	Endogenous	40.6	48.04	34.91	60.79	37.86	24.2	34.79	39.93	46.24	43.95	21.32	24.79	26.86	30.43	32.91
Tnfsf4	Endogenous	15.74	18.02	13.09	7.15	12.05	9.68	12.92	14.98	13.43	14.31	8.53	16.11	5.56	7.61	6.58
Tnfsf8	Endogenous	10.77	21.62	13.09	14.3	17.21	13.55	17.89	9.98	20.88	21.46	11.73	14.87	5.56	19.56	6.58
Tollip	Endogenous	478.05	562.09	490.22	526.83	521.44	465.59	593.38	391.35	386.36	412.92	460.62	504.45	433.52	448.81	357.6
Tpsab1	Endogenous	36.45	57.65	24	35.76	30.98	9.68	22.86	34.94	35.8	34.75	28.79	22.31	18.53	20.65	15.36
Traf2	Endogenous	179.79	105.69	129.46	200.24	180.7	178.1	203.76	144.76	156.63	151.27	229.24	190.87	221.39	215.17	197.45
Traf3	Endogenous	118.48	73.26	90.92	103.7	89.49	86.15	117.28	97.84	116.35	130.83	157.8	166.09	121.35	140.18	131.63
Traf6	Endogenous	144.99	127.31	114.92	154.95	91.21	132.61	178.91	105.82	96.96	84.83	104.49	90.48	94.48	71.72	87.75
Trem1	Endogenous	26.51	37.23	16.73	23.84	25.81	15.49	20.87	29.95	47.74	26.57	20.26	18.59	10.19	17.39	17.55
Trem2	Endogenous	103.56	120.1	91.64	94.16	91.21	56.14	153.07	126.79	122.32	117.54	118.35	115.27	120.42	77.16	157.96
Trp53	Endogenous	168.19	271.44	240.74	199.05	252.98	183.91	141.14	230.62	299.84	271.87	232.44	257.8	213.05	224.95	199.64
Twist1	Endogenous	208.79	110.5	121.46	121.58	204.79	181.98	124.24	147.76	117.85	110.38	166.33	76.85	174.15	105.41	103.11
Txk	Endogenous	16.57	14.41	17.46	21.45	25.81	10.65	19.88	22.96	17.9	25.55	10.66	8.68	13.89	11.95	19.74
Txnip	Endogenous	844.26	1269.5	779.69	729.46	696.98	652.41	639.1	805.66	969.62	545.79	895.65	882.48	781.82	636.81	708.61
Tyk2	Endogenous	78.71	168.15	82.19	81.05	94.65	60.01	50.69	110.82	102.93	136.96	110.89	154.93	99.12	116.28	107.5
Ubc	Endogenous	2567.57	1663.44	1949.22	2156.19	2030.7	2301.81	2475.88	2195.36	2236.1	1978.73	2249.78	1979.39	1724.81	1884.34	1891.1
Ulbp1	Endogenous	66.28	37.23	45.09	35.76	46.47	36.78	37.77	78.87	105.91	91.99	89.56	89.24	86.15	81.5	81.17
Usp18	Endogenous	33.14	50.44	34.91	47.68	48.19	30.97	36.78	38.94	58.18	43.95	24.52	38.42	32.42	35.86	39.49
Usp9y	Endogenous	9.94	7.21	12.36	16.69	17.21	7.74	5.96	13.98	16.41	11.24	6.4	13.63	5.56	7.61	8.78
Vcam1	Endogenous	77.88	99.69	77.82	91.78	80.88	35.81	97.41	74.88	155.14	137.98	56.51	52.06	63.92	66.29	89.95
Vegfa	Endogenous	175.65	140.52	119.28	133.5	104.98	84.21	176.92	106.82	102.93	73.59	158.87	195.83	150.06	132.58	144.79
Vegfc	Endogenous	75.39	96.08	70.55	81.05	98.09	81.31	100.39	76.87	74.59	62.35	56.51	57.01	68.55	57.6	76.78
Vhl	Endogenous	90.31	177.75	106.19	89.39	86.05	58.08	55.66	77.87	110.39	109.36	66.11	132.62	82.44	91.28	63.62
Vim	Endogenous	4965.29	3075.87	4831.6	3599.62	6503.42	3971.55	6045.08	4998.72	4757.11	4962.17	5241.66	4283.51	3800.7	4452.22	3926.99
Vwf	Endogenous	123.45	103.29	108.37	214.55	151.44	119.06	139.15	123.79	141.71	111.41	90.63	133.86	75.03	91.28	98.72
Xaf1	Endogenous	114.34	103.29	100.37	129.92	122.19	68.73	171.95	137.77	176.02	123.67	169.53	224.34	161.18	273.85	201.83
Xbp1	Endogenous	735.72	904.39	659.68	678.21	554.14	605.94	711.65	581.04	562.38	598.93	607.76	665.58	594.7	583.56	721.78
Xcl1	Endogenous	29	43.24	28.37	52.44	39.58	40.65	55.66	30.95	20.88	11.24	27.72	11.15	19.45	11.95	32.91
Xcr1	Endogenous	25.68	37.23	27.64	44.1	27.53	28.07	26.84	36.94	34.31	28.62	20.26	27.27	19.45	22.82	30.71
Ythdf2	Endogenous	297.44	263.03	297.48	312.28	289.12	292.32	307.12	304.5	286.41	251.43	303.88	280.11	312.17	257.55	261.07
Yy1	Endogenous	547.65	544.07	426.21	506.57	445.72	494.63	616.24	551.09	472.88	485.48	527.79	521.81	578.95	505.32	581.37
Zap70	Endogenous	11.6	25.22	17.46	35.76	15.49	11.62	15.9	14.98	25.36	16.35	23.46	19.83	11.12	11.95	21.94
Zbp1	Endogenous	62.97	62.45	56	102.51	72.28	72.6	202.76	87.85	65.64	48.04	83.17	104.11	100.97	209.73	72.4
Zfp13	Endogenous	45.57	73.26	42.18	45.29	60.23	31.94	30.81	61.9	99.95	55.19	74.64	86.76	62.99	71.72	41.68
Abcf1	Housekeeping	193.87	132.11	158.56	166.87	160.05	184.88	172.94	189.69	164.09	173.75	192.99	204.51	217.69	176.05	155.76
Alas1	Housekeeping	226.18	251.02	224.74	257.46	304.61	188.75	219.66	190.68	234.2	186.02	220.71	221.86	198.23	196.69	190.87
Edc3	Housekeeping	75.39	76.87	73.46	71.52	86.05	66.79	77.53	70.88	85.03	66.43	69.31	73.13	62.99	55.42	61.43
Eef1g	Housekeeping	1109.38	1089.35	1410.28	1511.36	1626.28	1653.28	1397.46	1175.05	1071.06	1031.27	1285.89	1144	1350.58	1157.34	1272.43
Eif2b4	Housekeeping	106.05	174.15	142.56	127.54	104.98	167.46	126.23	135.77	108.9	93.01	152.47	123.94	152.84	105.41	103.11
G6pdx	Housekeeping	240.27	96.08	213.11	262.22	265.02	334.91	276.31	224.63	125.3	144.11	181.26	138.82	235.29	127.14	109.69
Gusb	Housekeeping	270.92	136.92	188.38	233.62	266.75	188.75	353.84	292.52	305.8	282.09	242.04	242.93	235.29	285.8	289.59
Hdac3	Housekeeping	355.43	312.27	344.02	320.63	330.42	343.63	314.08	386.36	374.42	369.99	383.85	375.55	394.61	452.07	388.31
Hprt	Housekeeping	650.38	1506.11	965.16	897.52	757.21	815.99	882.61	703.83	613.1	584.63	665.34	660.62	758.66	679.19	789.79
Nubp1	Housekeeping	107.71	151.33	139.65	116.81	106.7	107.44	133.19	104.83	96.96	104.25	121.55	114.03	110.23	139.1	138.21
Oaz1	Housekeeping	2074.6	2297.6	2186.33	1750.94	1927.45	1930.12	2362.57	2083.55	2130.18	2120.8	2240.18	2200.01	1913.78	2231	2316.71
Polr1b	Housekeeping	48.88	76.87	61.82	45.29	39.58	48.4	39.76	45.92	43.26	57.24	50.11	50.82	55.58	49.99	52.65
Polr2a	Housekeeping	415.09	315.87	317.84	357.58	366.56	379.44	384.65	451.25	457.96	406.79	322.01	297.47	359.41	286.89	298.36
Ppia	Housekeeping	3330.63	3941.82	3994.46	3606.77	3746.48	3448.85	3954.84	3228.65	2995.38	3042.71	3072.92	3306.83	3203.22	3790.42	4220.97
Rpl19	Housekeeping	5879.97	9771.69	7708.17	6629.49	6002.62	7023.53	7715.87	5014.69	4024.68	4123.04	5162.76	4160.81	5617.22	5043.39	6226.15
Sap130	Housekeeping	133.39	39.63	65.46	112.04	118.74	124.87	142.13	113.81	111.88	94.03	131.15	138.82	108.38	124.97	131.63
Sdha	Housekeeping	372	243.81	289.47	433.86	487.02	483.98	457.21	413.32	368.46	353.64	387.05	353.24	406.66	378.17	326.88
Sf3a3	Housekeeping	205.47	299.06	272.75	247.92	252.98	239.09	196.8	277.54	298.35	333.2	230.31	294.99	241.77	285.8	309.33
Tbp	Housekeeping	124.28	88.88	77.82	97.74	60.23	92.92	84.48	95.84	105.91	123.67	106.62	100.39	97.26	102.15	96.53
Tubb5	Housekeeping	1294.97	4479.89	2306.34	1600.76	2388.66	1351.27	1070.46	2062.58	2879.03	3096.88	1743.31	2325.19	1598.83	2081.04	2182.88
NEG_A	Negative	11	10	15	15	10	11	6	16	19	11	12	11	11	7	6
NEG_B	Negative	10	7	8	6	2	3	5	8	9	6	2	4	9	2	4
NEG_C	Negative	44	29	24	22	18	13	24	29	18	30	14	21	16	18	8
NEG_D	Negative	21	18	15	8	9	10	14	19	11	20	4	9	12	8	7
NEG_E	Negative	21	21	10	8	10	10	13	10	15	17	8	16	20	6	3
NEG_F	Negative	19	23	23	26	7	18	17	26	18	20	14	11	12	10	8
NEG_G	Negative	29	27	19	25	19	9	14	27	26	24	10	11	15	18	7
NEG_H	Negative	32	30	21	26	8	13	15	24	21	34	16	13	11	15	3
POS_A	Positive	31210	30110	20218	21450	21624	30107	24015	28568	25325	28273	28603	25520	22340	23597	18022
POS_B	Positive	11481	11430	8030	8351	9625	12105	9409	11047	10129	11138	11836	10884	9703	10418	7892
POS_C	Positive	3627	3528	2451	2757	3091	3870	3010	3467	3323	3491	3769	3487	3036	3428	2690
POS_D	Positive	775	783	530	599	612	786	626	734	674	737	760	719	624	734	542
POS_E	Positive	143	153	100	107	125	152	121	143	111	121	136	125	131	135	116
POS_F	Positive	60	58	53	56	48	63	50	61	52	70	63	49	48	45	38

## Sheet: KO vs. WT_PanCancerImmunePanel
Gene	Test Type	P-value	Adj. P-value	Median 1. group	Median 2. group	Fold Changes	Log2 FC
Il13ra1	t.test	2.84709e-06	0.00103838	7.24267	9.17365	0.31789	-1.6534
Cd207	t.test	3.30944e-06	0.00103838	4.46963	6.90725	0.224332	-2.15629
Abl1	t.test	4.15353e-06	0.00103838	8.82859	7.93981	1.85142	0.888634
Spink5	t.test	8.97557e-06	0.00154356	4.24441	5.75622	0.31936	-1.64674
Il34	t.test	1.23485e-05	0.00154356	7.35991	8.11536	0.574508	-0.799601
H2.Ab1	t.test	1.16635e-05	0.00154356	10.3763	11.3735	0.519619	-0.944474
Chit1	t.test	1.45427e-05	0.00155814	5.68012	7.94304	0.202191	-2.30621
Itgb3	t.test	2.21759e-05	0.00184799	8.05094	6.95699	2.03454	1.0247
Anp32b	t.test	2.06955e-05	0.00184799	11.0505	10.3657	1.57959	0.659554
Cd164	t.test	3.15566e-05	0.00215159	9.53737	9.94541	0.759931	-0.396061
Ccl22	t.test	2.94116e-05	0.00215159	5.71175	7.09972	0.35558	-1.49175
H2.Aa	t.test	4.08184e-05	0.00255115	11.0582	11.8986	0.543129	-0.880634
Il12rb2	t.test	8.57651e-05	0.00494798	3.8893	5.17552	0.335577	-1.57529
Ccl20	t.test	0.000100126	0.0050063	4.7616	5.84449	0.472853	-1.08054
Anxa1	t.test	9.76033e-05	0.0050063	10.9239	11.7102	0.600199	-0.736488
Lgals3	t.test	0.000129095	0.00605133	9.98614	11.9877	0.233178	-2.1005
Il1rn	t.test	0.000147691	0.00651578	6.33327	8.22718	0.278179	-1.84591
Il1rl2	t.test	0.000168724	0.00703019	7.31705	7.98288	0.587156	-0.768183
Fyn	t.test	0.000181722	0.00709726	9.55196	9.0117	1.59883	0.677019
Defb1	t.test	0.00018926	0.00709726	6.32406	8.88719	0.191877	-2.38175
Ulbp1	wilcox.test	0.0003108	0.00807425	6.4542	5.23917	2.05615	1.03994
Serpinb2	wilcox.test	0.0003108	0.00807425	6.14252	8.93978	0.191367	-2.38558
Rrad	t.test	0.000312204	0.00807425	7.03343	5.69042	2.35227	1.23406
Mfge8	wilcox.test	0.0003108	0.00807425	7.07205	7.51223	0.590658	-0.759606
Lamp2	wilcox.test	0.0003108	0.00807425	10.4208	10.8713	0.675107	-0.566812
Ctsw	t.test	0.000230115	0.00807425	4.41852	5.42324	0.518937	-0.946368
Cd99	t.test	0.000310414	0.00807425	9.48088	8.87535	1.52645	0.610176
Cd9	t.test	0.00031046	0.00807425	10.366	11.1729	0.531182	-0.912721
Apoe	t.test	0.000263731	0.00807425	12.7396	13.2795	0.683274	-0.549464
Il1a	t.test	0.000354016	0.00865858	3.79353	5.48349	0.349439	-1.51689
Cd3g	t.test	0.000357888	0.00865858	4.31316	5.74524	0.405404	-1.30257
Myc	t.test	0.000486597	0.0114046	7.65356	8.40523	0.580374	-0.784944
Smpd3	t.test	0.000534468	0.0117412	6.12114	7.61736	0.375808	-1.41193
Map2k4	t.test	0.000547921	0.0117412	7.65769	8.6799	0.577735	-0.79152
Ccl19	t.test	0.000526391	0.0117412	5.05821	6.86814	0.323411	-1.62856
Prkce	t.test	0.000569393	0.0118624	7.53522	6.91253	1.71523	0.778402
Atf2	wilcox.test	0.000621601	0.0126	8.01612	7.61611	1.40163	0.487105
Il1r2	t.test	0.000647337	0.0127764	4.8106	5.83719	0.473063	-1.07989
Tnfrsf14	t.test	0.000744982	0.0130683	8.06516	7.05951	2.10213	1.07185
Smad3	t.test	0.000710039	0.0130683	8.69909	8.00242	1.63617	0.710326
Map3k1	t.test	0.000742959	0.0130683	7.32112	6.91253	1.28227	0.358703
Il13ra2	t.test	0.000749249	0.0130683	4.29566	5.72383	0.436557	-1.19576
Creb5	t.test	0.000692229	0.0130683	6.99887	6.43413	1.4471	0.533168
Itch	t.test	0.000801632	0.013587	9.77529	9.2219	1.5209	0.604928
Bcl6	t.test	0.000815223	0.013587	5.96833	6.76115	0.603975	-0.727439
Mif	t.test	0.000945939	0.0149921	8.70927	9.53138	0.612415	-0.707418
Irak3	t.test	0.00093534	0.0149921	6.3268	6.86814	0.677652	-0.561383
Igf1r	t.test	0.000992301	0.0149921	8.67032	7.97419	1.50187	0.586762
Bax	t.test	0.000963101	0.0149921	7.59151	7.12309	1.44829	0.534355
Atm	t.test	0.000999475	0.0149921	7.08137	6.63952	1.28275	0.359239
Masp1	t.test	0.00108009	0.0153058	4.59982	5.66988	0.429061	-1.22075
Il18	t.test	0.00110202	0.0153058	5.66828	7.23917	0.376088	-1.41086
Ewsr1	t.test	0.0010436	0.0153058	10.1857	9.47247	1.5254	0.609185
Cd74	t.test	0.00108279	0.0153058	11.538	12.3285	0.542121	-0.883314
Tnfaip3	wilcox.test	0.0012432	0.01665	6.06546	6.46695	0.65168	-0.617765
Lck	wilcox.test	0.0012432	0.01665	4.56739	4.96671	0.650029	-0.621425
Lcp1	t.test	0.00127426	0.0167666	8.167	8.89715	0.646897	-0.628393
Ccl8	t.test	0.00133453	0.0172569	9.52323	10.9819	0.43047	-1.21602
Ccr4	t.test	0.00138058	0.0175498	4.26078	5.15502	0.535921	-0.899909
Tnfrsf18	t.test	0.00145195	0.0180541	4.64515	5.8679	0.463968	-1.1079
Irak1	t.test	0.0014684	0.0180541	7.80692	7.35306	1.31119	0.390877
C1qbp	t.test	0.0015225	0.0184173	8.82692	9.23441	0.753695	-0.407947
Tollip	t.test	0.00157016	0.0186923	8.72484	9.02636	0.815151	-0.294861
Il2ra	t.test	0.00180319	0.0211312	5.62658	6.18408	0.656167	-0.607865
Pin1	t.test	0.0018388	0.0211843	5.86822	4.78869	2.04905	1.03496
Hsd11b1	t.test	0.00186422	0.0211843	5.60288	6.5741	0.458838	-1.12394
Xcl1	t.test	0.00220411	0.0232829	4.33287	5.34518	0.474336	-1.07602
Prdm1	wilcox.test	0.0021756	0.0232829	4.44009	6.13586	0.431201	-1.21357
Gata3	t.test	0.00213241	0.0232829	6.71353	8.77189	0.263029	-1.9267
Ets1	t.test	0.00217018	0.0232829	9.82347	9.18272	1.78995	0.839916
Arg1	t.test	0.0020894	0.0232829	6.18928	7.90093	0.3053	-1.7117
H2.DMb1	t.test	0.00224745	0.023411	6.35713	7.13072	0.619492	-0.690843
Spn	t.test	0.00246677	0.0253435	4.8865	5.64933	0.573224	-0.80283
Dusp6	t.test	0.00254018	0.0257451	10.3977	9.84925	1.50599	0.590709
Il18r1	t.test	0.00261275	0.0261275	5.58439	6.43429	0.573573	-0.801951
Pou2f2	t.test	0.00266602	0.0263094	5.24556	4.48349	1.63062	0.70542
Tab1	t.test	0.00272994	0.0265904	7.47247	6.8382	1.45573	0.541742
CD209e	t.test	0.00281603	0.0270772	3.76804	5.04045	0.285157	-1.81017
Vegfc	t.test	0.00295989	0.0279654	6.0307	6.34536	0.769762	-0.377516
Il2rg	t.test	0.00298298	0.0279654	5.04229	5.42895	0.694306	-0.526355
Traf6	t.test	0.00310346	0.0287358	6.53073	7.05105	0.690996	-0.533251
Pparg	t.test	0.00338536	0.0309636	4.64371	5.42324	0.570965	-0.808526
Pml	t.test	0.00344511	0.0311305	7.50639	6.79857	1.60885	0.686033
Rora	t.test	0.00348958	0.0311569	7.97292	9.01399	0.590048	-0.761096
Socs1	wilcox.test	0.0037296	0.0314292	5.36038	5.95745	0.611231	-0.710211
Mcam	t.test	0.00369196	0.0314292	11.7531	10.5959	2.12199	1.08542
Cmpk2	t.test	0.00361928	0.0314292	6.56439	5.90809	1.47892	0.564546
Cebpb	wilcox.test	0.0037296	0.0314292	7.68162	8.9308	0.482151	-1.05244
Bst1	wilcox.test	0.0037296	0.0314292	4.52443	4.90737	0.649198	-0.623269
Traf3	t.test	0.0039006	0.0319649	7.03595	6.50653	1.36891	0.453029
Tnfrsf4	t.test	0.00392103	0.0319649	3.9941	5.2384	0.401233	-1.31749
Cxcr4	t.test	0.00388461	0.0319649	6.30596	6.70722	0.722014	-0.469901
Cxcl16	t.test	0.00406367	0.0324229	7.26015	8.26777	0.514482	-0.958808
Angpt2	t.test	0.0040512	0.0324229	8.28404	7.20945	2.2704	1.18295
H2.T23	t.test	0.0045017	0.0355397	9.20874	9.78319	0.650411	-0.620575
Blnk	t.test	0.00458223	0.0357987	5.78295	6.5359	0.569545	-0.812119
Itga5	t.test	0.00465144	0.0359647	6.8147	6.47135	1.30677	0.386005
Tfrc	t.test	0.00485173	0.0371306	7.4555	8.38772	0.53957	-0.890119
Fn1	t.test	0.00499905	0.0378716	11.4022	10.9337	1.67133	0.740996
Ltb	t.test	0.00536111	0.0402083	4.53845	5.42694	0.56871	-0.814234
Hspb2	t.test	0.00543045	0.0403251	7.5396	6.76049	1.6152	0.691709
Xaf1	t.test	0.00591645	0.0413868	7.4325	6.83719	1.58957	0.668635
Notch1	wilcox.test	0.00590521	0.0413868	9.13541	8.72059	1.35958	0.443163
Ifnar1	t.test	0.00593079	0.0413868	8.73476	8.27538	1.40707	0.492691
Icam1	t.test	0.00575645	0.0413868	6.07611	6.71273	0.619915	-0.689858
Cdh1	t.test	0.00577997	0.0413868	8.81703	10.1434	0.348622	-1.52027
Cd47	t.test	0.0059597	0.0413868	9.13371	9.44313	0.771083	-0.375042
Cd3e	t.test	0.00582425	0.0413868	4.70823	5.59694	0.552217	-0.856693
Tbk1	t.test	0.00643737	0.0434096	7.25424	7.02447	1.2391	0.30929
S100b	t.test	0.00665614	0.0434096	9.6053	8.62037	2.17189	1.11895
Psmb7	t.test	0.00664512	0.0434096	8.87993	9.53807	0.714696	-0.484599
Klrb1c	t.test	0.00655536	0.0434096	3.98395	4.42895	0.728043	-0.457905
Itgb1	t.test	0.0066326	0.0434096	12.2889	11.7541	1.43933	0.525398
Ifit2	t.test	0.00637979	0.0434096	7.55876	5.74524	2.43632	1.2847
H2.DMb2	t.test	0.00664744	0.0434096	5.37694	5.89724	0.627391	-0.672564
Ctsl	t.test	0.00681554	0.044066	9.04745	9.60864	0.623852	-0.680725
Il7r	t.test	0.00716791	0.0448038	5.23294	6.25323	0.570118	-0.810666
Il2rb	t.test	0.00715948	0.0448038	5.58714	6.36807	0.55942	-0.837996
Hif1a	t.test	0.00701575	0.0448038	9.62351	10.0292	0.714475	-0.485044
Epcam	t.test	0.00716861	0.0448038	7.90138	9.29497	0.306877	-1.70427
Mertk	t.test	0.00770582	0.0473719	7.50737	6.70722	1.76232	0.817478
Cd5	t.test	0.00768722	0.0473719	3.72225	4.49506	0.4828	-1.0505
Pdgfc	t.test	0.00789147	0.0477307	5.97245	6.53045	0.712482	-0.489075
Cx3cr1	t.test	0.0078518	0.0477307	7.99624	6.92434	2.06199	1.04403
Ncam1	t.test	0.00819782	0.0489355	9.66138	8.64656	1.99246	0.994554
Klrk1	t.test	0.00822116	0.0489355	4.51902	5.08236	0.546967	-0.870475
Bcl10	t.test	0.00922678	0.0544889	7.8036	8.20168	0.755791	-0.403941
Ccl17	wilcox.test	0.00932401	0.0546329	5.27536	6.98356	0.375107	-1.41462
Gtf3c1	t.test	0.00978655	0.0568986	7.4573	7.12298	1.22673	0.294814
Ccl27a	t.test	0.00988961	0.0570554	7.1245	9.24444	0.221098	-2.17724
Tgfb3	t.test	0.0102813	0.0584165	7.06798	6.52309	1.37712	0.461649
Lta	t.test	0.0102606	0.0584165	3.36869	4	0.56263	-0.829741
C4b	t.test	0.010643	0.060017	10.8818	9.96168	1.71605	0.779094
Mme	t.test	0.0110685	0.0614768	5.46453	6.13791	0.622026	-0.684953
Cxcr6	t.test	0.0111478	0.0614768	4.19705	5.09508	0.545872	-0.873366
Cd7	t.test	0.0109947	0.0614768	4.54198	5.47379	0.521686	-0.938746
Tnfrsf11b	t.test	0.0116907	0.0640003	4.84187	5.58646	0.64995	-0.6216
Tnfsf13	t.test	0.0120115	0.0652801	5.00462	4.10518	1.64333	0.716623
Itgb4	t.test	0.0121163	0.0653757	7.84783	8.29889	0.77632	-0.365276
Cd276	t.test	0.012737	0.0682342	7.50315	6.96751	1.49151	0.576775
Ccl5	t.test	0.012839	0.0682926	4.08231	4.96486	0.540038	-0.888868
Psma2	t.test	0.0131962	0.0687302	9.56996	9.81566	0.797763	-0.325968
Il6ra	t.test	0.0130895	0.0687302	7.19139	7.82661	0.655948	-0.608348
Birc5	t.test	0.0131621	0.0687302	7.02301	6.58661	1.24207	0.312743
Cd69	t.test	0.0135304	0.0699849	3.69861	4.25323	0.613048	-0.705928
St6gal1	t.test	0.014094	0.0707778	8.79638	8.07162	1.53113	0.614596
Clu	t.test	0.0141556	0.0707778	8.55618	9.44688	0.460894	-1.11749
Ccr9	t.test	0.0139372	0.0707778	4.15217	4.89869	0.614662	-0.702134
Ccl25	wilcox.test	0.013986	0.0707778	5.44676	4.96671	1.61675	0.693099
Akt3	wilcox.test	0.013986	0.0707778	8.38308	7.34802	2.04466	1.03186
Tfeb	t.test	0.0144496	0.07171	7.25182	6.72055	1.31552	0.395628
Rel	t.test	0.0145332	0.07171	6.5431	6.97304	0.776801	-0.364384
Tnfsf12	t.test	0.0147374	0.0722419	7.11389	6.29774	1.63644	0.710564
Il22ra1	t.test	0.0151562	0.0733366	5.46121	6.10287	0.636345	-0.652118
Bid	t.test	0.0151335	0.0733366	5.29053	5.57531	0.73529	-0.443615
H2.K1	t.test	0.015365	0.0738704	8.79835	9.62148	0.586411	-0.770015
Ripk2	t.test	0.0181417	0.0854635	5.70556	6.20945	0.677714	-0.561252
Psmb8	t.test	0.0181971	0.0854635	7.90098	8.51791	0.679131	-0.558237
Col4a1	t.test	0.0181373	0.0854635	12.1326	11.7716	1.71183	0.775536
Ccl21a	t.test	0.0182322	0.0854635	8.80214	10.1218	0.383546	-1.38253
Hck	t.test	0.0194499	0.0906051	6.65961	6.09529	1.38375	0.468587
Ifit3	t.test	0.0199563	0.090827	8.39485	7.62278	1.91102	0.934345
Fap	t.test	0.0199819	0.090827	8.3423	7.53807	1.51002	0.594571
F2rl1	t.test	0.0197876	0.090827	5.33193	6.75101	0.460295	-1.11937
Cd33	t.test	0.0197178	0.090827	5.91189	5.3837	1.44727	0.533334
Nfatc2	t.test	0.020125	0.0909261	8.78058	7.8716	2.20605	1.14147
Ltbr	wilcox.test	0.0205128	0.0915751	8.73961	8.3975	1.22805	0.296375
Ifitm1	wilcox.test	0.0205128	0.0915751	6.47452	7.15543	0.656543	-0.607039
Card11	t.test	0.0207507	0.092089	5.03196	4.62819	1.35226	0.435367
Ccr7	t.test	0.0219005	0.0966199	4.75292	5.34341	0.614055	-0.70356
Zfp13	t.test	0.0222506	0.0975905	6.07068	5.50112	1.4911	0.576372
Il6	t.test	0.0226862	0.0989222	3.92014	4.42291	0.552457	-0.856065
Runx1	t.test	0.0232168	0.100072	7.54928	7.99599	0.746829	-0.42115
Mapk8	t.test	0.0231199	0.100072	8.01876	7.3831	1.3778	0.462368
H2.D1	t.test	0.0235314	0.100849	11.0105	11.5172	0.662486	-0.594039
Itgax	t.test	0.0238255	0.100955	4.81	5.59066	0.644163	-0.634502
Ifi35	t.test	0.0237845	0.100955	7.07673	7.37243	0.725433	-0.463085
Psmb9	t.test	0.0249796	0.105251	6.76221	7.34873	0.708849	-0.49645
Cd3d	t.test	0.0251407	0.105338	5.01411	5.87381	0.594183	-0.751022
Sele	t.test	0.0264378	0.108793	3.64399	4.04089	0.730566	-0.452914
Mef2c	t.test	0.0265111	0.108793	9.40332	9.0732	1.39394	0.479173
Cd163	t.test	0.0265455	0.108793	6.19003	7.21985	0.556893	-0.844528
Bcl2	t.test	0.0265187	0.108793	6.85392	6.45648	1.4341	0.520144
Nrp1	t.test	0.0273317	0.111406	8.89919	8.20945	1.64878	0.7214
Nod1	t.test	0.0282761	0.113499	7.28018	6.93298	1.27335	0.348629
Lrrn3	wilcox.test	0.0289044	0.113499	6.96926	5.56163	1.89213	0.920014
Itgae	t.test	0.0286249	0.113499	5.66923	6.13791	0.737533	-0.439221
Il16	t.test	0.0286543	0.113499	5.79742	5.34802	1.62431	0.699826
H2.Eb1	t.test	0.0281842	0.113499	9.69376	10.1241	0.763584	-0.389141
Ddx58	wilcox.test	0.0289044	0.113499	7.54985	7.15826	1.24975	0.321639
Cxcl14	t.test	0.0283653	0.113499	9.6426	10.2858	0.692304	-0.530521
Tnfrsf12a	t.test	0.0316692	0.121805	8.0945	8.53869	0.722632	-0.468667
Icos	t.test	0.0316527	0.121805	4.86853	5.57531	0.577392	-0.792376
Chuk	t.test	0.0314779	0.121805	8.13738	7.75942	1.39702	0.482355
Bcl2l1	t.test	0.0315947	0.121805	8.26578	7.81679	1.31735	0.39764
Cd6	t.test	0.0326223	0.12483	3.46582	4.29572	0.575018	-0.798321
Lbp	t.test	0.032802	0.124881	7.30857	7.91534	0.633078	-0.659545
Tap1	t.test	0.0331604	0.125346	7.21299	7.80478	0.676805	-0.563187
Klrd1	t.test	0.0332584	0.125346	5.12919	5.69014	0.702882	-0.508645
Lyn	t.test	0.0340702	0.127763	7.39106	7.12091	1.36154	0.44524
H2.Dma	t.test	0.0343366	0.128122	6.85121	7.30606	0.676185	-0.564511
Il19	t.test	0.0347123	0.128882	4.1983	6.12102	0.320001	-1.64385
Cxcr2	t.test	0.0351482	0.129858	5.50402	6.07168	0.656322	-0.607524
Reps1	t.test	0.0380863	0.140023	7.40256	7.1632	1.26193	0.335634
Ccr6	t.test	0.0385498	0.141036	3.78	4.31325	0.642529	-0.638166
Tgfb2	wilcox.test	0.0400932	0.141839	7.40688	6.8475	1.50551	0.59025
Tapbp	t.test	0.0391117	0.141839	7.10754	7.29554	0.782455	-0.353921
Prg2	wilcox.test	0.0400932	0.141839	4.76229	3.78346	1.53576	0.618949
Pdcd1lg2	wilcox.test	0.0400932	0.141839	4.11811	4.69153	0.586509	-0.769775
Lcn2	wilcox.test	0.0400932	0.141839	5.77874	7.55888	0.36663	-1.4476
C6	wilcox.test	0.0400932	0.141839	5.06738	5.60585	0.688822	-0.537797
Atg12	wilcox.test	0.0400932	0.141839	7.68137	7.39789	1.1654	0.22083
Itga1	t.test	0.0409356	0.14414	11.28	10.5189	1.81673	0.861345
Map3k5	t.test	0.0412149	0.144445	7.06721	6.65935	1.3288	0.410129
Itga2	t.test	0.0417498	0.145639	8.99658	8.29099	1.68453	0.752344
Pvr	t.test	0.0422824	0.146814	6.87618	6.38612	1.37505	0.459485
Smn1	t.test	0.0431828	0.148565	7.74846	7.64559	1.14234	0.191993
Irf3	t.test	0.0430051	0.148565	7.7195	7.39283	1.16627	0.221899
Slamf7	t.test	0.0439562	0.150535	5.3119	5.74524	0.729031	-0.455948
Map4k2	t.test	0.0442996	0.151021	6.02066	5.60585	1.24862	0.320338
Flt3l	t.test	0.0455037	0.154424	5.82043	5.2765	1.35416	0.437395
Smad2	t.test	0.0467199	0.157838	7.57671	7.14812	1.20048	0.263613
Il3ra	t.test	0.0473264	0.159169	7.11755	6.87061	1.29355	0.371334
Oas2	t.test	0.0483305	0.161102	6.55779	6.18408	1.41484	0.500635
Flt3	t.test	0.0483128	0.161102	4.24685	4.6565	0.723514	-0.466907
Dusp4	t.test	0.0487851	0.161897	9.42005	8.88341	1.57408	0.654511
Il1rap	t.test	0.0504166	0.165844	9.69673	9.11439	1.61525	0.691759
Ada	t.test	0.05022	0.165844	4.98285	5.42324	0.721514	-0.470902
Pdcd1	t.test	0.0510095	0.167062	3.70437	4.18428	0.694404	-0.526152
Ikzf2	t.test	0.0521493	0.169316	5.84095	6.45566	0.696126	-0.522579
Abcg1	t.test	0.0520995	0.169316	7.61077	8.11014	0.675	-0.56704
Nfatc3	t.test	0.0524219	0.169467	6.45585	6.85325	0.822697	-0.281568
Runx3	t.test	0.0544344	0.171512	3.86612	4.29572	0.718338	-0.477265
Psen2	wilcox.test	0.0540793	0.171512	7.91149	7.48317	1.18936	0.250183
Psen1	wilcox.test	0.0540793	0.171512	7.65815	8.2384	0.777266	-0.36352
Pla2g6	t.test	0.0545977	0.171512	6.11027	5.8679	1.21421	0.280015
Irf2	t.test	0.0546552	0.171512	7.83947	7.55704	1.22686	0.294975
Cmah	t.test	0.0535063	0.171512	6.85552	6.27575	1.60732	0.684655
Abca1	wilcox.test	0.0540793	0.171512	8.60974	8.81173	0.801725	-0.31882
Tyk2	t.test	0.0554016	0.172566	6.79253	6.34074	1.41349	0.499266
Stat6	t.test	0.0554514	0.172566	8.20485	8.37673	0.885329	-0.175715
Tgfbr2	t.test	0.0561644	0.173347	10.6648	10.062	1.41099	0.496705
Fadd	wilcox.test	0.0559775	0.173347	5.73983	5.42324	1.19669	0.259052
Tnfrsf1b	t.test	0.058716	0.180479	7.54605	7.04767	1.3528	0.435945
Klrc2	t.test	0.0596043	0.180985	3.27999	4.06091	0.548663	-0.866007
Ccl3	t.test	0.0591478	0.180985	5.55643	4.89821	1.5534	0.635433
Ccl2	t.test	0.0594714	0.180985	8.42132	7.10287	1.67868	0.747327
Cklf	t.test	0.0599864	0.181411	6.02263	5.41752	1.4142	0.49999
Ikbkg	t.test	0.0603239	0.181699	6.57475	6.32805	1.17918	0.23779
Fut7	t.test	0.0619251	0.185775	3.7076	4.18428	0.716488	-0.480985
Il18rap	t.test	0.0676439	0.202123	4.12638	4.51475	0.74278	-0.428993
Il6st	t.test	0.0685771	0.204099	9.49332	9.24429	1.31092	0.390582
Cd244	t.test	0.0688961	0.204237	5.74115	6.10371	0.786467	-0.346542
Ly96	t.test	0.0692656	0.204367	6.71691	6.90845	0.828007	-0.272284
Jam3	t.test	0.0694846	0.204367	8.2412	7.56803	1.55163	0.633786
Tgfbr1	t.test	0.0702902	0.205928	7.8665	7.71562	1.14863	0.199912
Fez1	t.test	0.0712297	0.207869	8.66181	8.12939	1.51015	0.594691
Elk1	t.test	0.0715159	0.207895	4.64549	3.89821	1.64914	0.721712
Cxcl3	t.test	0.0724249	0.209725	3.26068	4.35191	0.594544	-0.750145
Cd63	t.test	0.0733653	0.21125	11.1014	11.3199	0.836967	-0.256758
Cd55	t.test	0.0737966	0.21125	5.87527	6.3194	0.675034	-0.566968
Adora2a	t.test	0.0735806	0.21125	4.28871	3.78869	1.54148	0.624316
Tmed1	t.test	0.0741075	0.211333	7.41629	7.12567	1.19268	0.25421
Cxcl10	t.test	0.0748581	0.212665	5.22459	5.56316	0.60289	-0.730034
Il22ra2	t.test	0.0772495	0.216398	4.03453	5.12102	0.582417	-0.779875
Ikbkb	t.test	0.0768207	0.216398	8.09933	7.66583	1.29115	0.368654
Cfd	t.test	0.0764667	0.216398	8.37258	10.1391	0.37797	-1.40366
Atg16l1	t.test	0.0773263	0.216398	7.59037	7.072	1.26013	0.333573
Tnfrsf8	t.test	0.0801385	0.223435	2.91511	3.97636	0.488986	-1.03214
Ccr3	t.test	0.0811564	0.225434	5.21604	4.17153	1.64608	0.719034
Ikbke	t.test	0.0819696	0.226853	6.63572	6.29554	1.29669	0.374832
Csf2	t.test	0.0824425	0.227323	3.6121	3.99095	0.626735	-0.674072
Tlr1	t.test	0.0835021	0.228564	5.93175	5.16027	1.36106	0.444734
Klra2	t.test	0.0834978	0.228564	4.72742	4.45088	1.57552	0.655831
Vwf	t.test	0.0860589	0.22888	6.7125	6.94778	0.796383	-0.328466
Siglec1	t.test	0.0853358	0.22888	6.33193	6.05723	1.37139	0.455641
Map3k7	t.test	0.0859377	0.22888	7.84689	7.47727	1.17461	0.232181
Il11ra1	t.test	0.0849527	0.22888	6.21293	6.44758	0.779044	-0.360223
Ddx60	t.test	0.0860477	0.22888	6.3417	5.87897	1.32998	0.411406
Ctss	t.test	0.0840626	0.22888	9.50465	9.98041	0.676794	-0.563212
Cspg4	t.test	0.0846868	0.22888	10.9438	9.96821	1.52501	0.608823
Cd48	t.test	0.0856405	0.22888	6.72457	6.93981	0.819213	-0.287689
Foxp3	t.test	0.0868468	0.229349	4.82054	5.2075	0.662149	-0.594772
Amica1	t.test	0.0866426	0.229349	5.70234	6.03232	0.765116	-0.38625
Lrp1	t.test	0.0887174	0.233467	10.7773	10.3354	1.34118	0.423501
Ccnd3	t.test	0.089503	0.234711	8.77261	8.1953	1.38414	0.468994
Nefl	t.test	0.0901538	0.235594	3.23709	3.53854	0.626604	-0.674373
Cd81	t.test	0.0923054	0.240379	11.8554	11.4802	1.32247	0.403235
S100a8	wilcox.test	0.0938617	0.241912	10.0745	13.6324	0.22614	-2.14471
Lyz2	wilcox.test	0.0938617	0.241912	12.1329	12.3101	0.751318	-0.412504
Ccl1	wilcox.test	0.0938617	0.241912	4.74712	6.86158	0.380861	-1.39266
Ctsh	t.test	0.0951412	0.24437	9.62733	9.85465	0.829877	-0.26903
C3	t.test	0.0967308	0.247604	6.89739	7.99124	0.607258	-0.719619
Sh2d1a	t.test	0.0984307	0.251099	3.79597	4.58676	0.6168	-0.697125
Ifnar2	t.test	0.0999132	0.254017	7.88008	7.38258	1.33891	0.421061
Selplg	t.test	0.100928	0.255333	6.8775	7.36519	0.784181	-0.350742
Itga6	t.test	0.101112	0.255333	9.49803	9.85401	0.868368	-0.203621
Klra3	t.test	0.105357	0.265159	3.30606	3.69153	0.788575	-0.342681
Havcr2	t.test	0.107036	0.268485	5.19412	5.3837	0.823544	-0.280082
Itga4	t.test	0.109908	0.274769	9.13885	8.70307	1.56361	0.644881
Tigit	t.test	0.110476	0.275076	4.85626	5.53605	0.70735	-0.499504
Lyve1	t.test	0.110764	0.275076	5.89142	6.17113	0.717564	-0.47882
Cd44	t.test	0.111293	0.275478	5.2143	5.10518	1.15763	0.211175
Eng	t.test	0.112491	0.277528	9.45682	8.99404	1.37508	0.45952
Ilf3	t.test	0.113486	0.279064	7.00092	6.80555	1.10983	0.150339
Cd1d1	t.test	0.116892	0.286501	5.82926	6.09972	0.782715	-0.353442
Ifnl2	t.test	0.119478	0.291883	3.7434	4	0.679844	-0.556724
Arg2	wilcox.test	0.120591	0.293646	4.38633	4.74631	0.534827	-0.902856
Xbp1	t.test	0.12138	0.294611	9.22113	9.40559	0.893624	-0.16226
Igf2r	t.test	0.12301	0.296649	8.25937	8.07162	1.13195	0.178816
Ccl4	t.test	0.122684	0.296649	3.41983	3.78346	0.724172	-0.465596
Ccl11	t.test	0.12705	0.305408	10.7121	9.72678	1.70973	0.773766
Prf1	t.test	0.130215	0.312017	2.55509	3.12267	0.670542	-0.5766
Cfp	t.test	0.132201	0.315767	7.13087	7.45566	0.736916	-0.440428
Ptgs2	t.test	0.132908	0.316448	4.29343	4.71039	0.658026	-0.603784
Ep300	t.test	0.135174	0.320825	8.5333	8.45063	1.06289	0.0879979
Ifi44l	t.test	0.137987	0.326468	3.15966	3.89821	0.693452	-0.528132
Trp53	t.test	0.141931	0.334743	7.85504	7.63699	1.17728	0.235459
Nup107	t.test	0.143007	0.336223	7.48742	7.37964	1.12546	0.170519
Il12rb1	t.test	0.143657	0.336695	3.81153	4.25248	0.806223	-0.310749
Cfb	t.test	0.14683	0.34306	6.35547	6.82757	0.764478	-0.387453
Cxcr3	t.test	0.14972	0.348726	5.16344	5.40088	0.790286	-0.339554
Trem2	wilcox.test	0.151981	0.350726	6.89942	6.55704	1.20508	0.26913
Mapk1	wilcox.test	0.151981	0.350726	9.37343	9.42821	0.871505	-0.19842
Cd247	wilcox.test	0.151981	0.350726	4.98524	5.31361	0.746304	-0.422164
Raet1	t.test	0.152786	0.351502	5.25356	4.95373	1.21534	0.281358
Nod2	t.test	0.154189	0.353644	4.84384	5.20085	0.809558	-0.304793
C1ra	t.test	0.158709	0.362903	7.6744	7.99599	0.771063	-0.37508
Egr1	t.test	0.163382	0.372452	8.72746	8.87169	0.782513	-0.353814
Atf1	t.test	0.167189	0.379975	7.02265	6.95745	1.13693	0.18515
Gpi1	t.test	0.168495	0.380636	9.99871	10.306	0.851536	-0.231861
Cd200	t.test	0.168377	0.380636	9.4381	9.00419	1.327	0.408165
Crebbp	t.test	0.172841	0.389281	9.4798	9.29845	1.0931	0.128423
Ifi27	t.test	0.174699	0.392289	9.91502	9.69439	1.12905	0.175109
Marco	t.test	0.175886	0.393775	3.67262	4.16027	0.744123	-0.426386
Jak1	t.test	0.177744	0.396751	9.61773	9.59537	1.10647	0.145962
Twist1	t.test	0.182275	0.405657	6.83357	6.95699	0.817146	-0.291334
Atg10	t.test	0.184386	0.409141	6.45003	6.34074	1.16225	0.216922
Rps6	t.test	0.186236	0.412027	7.21981	7.43421	0.907096	-0.140673
Il17ra	t.test	0.194251	0.428494	6.16578	6.45648	0.873839	-0.194561
Il24	t.test	0.196051	0.431197	3.82086	4.6565	0.617086	-0.696457
Cxcl2	t.test	0.197281	0.432634	3.33406	3.99095	0.756325	-0.402922
Dll4	t.test	0.198449	0.433927	4.92665	4.57531	1.20898	0.273786
Slamf6	t.test	0.201862	0.439595	3.70895	3.85997	0.773496	-0.370534
Egr2	t.test	0.202214	0.439595	6.21401	6.50764	0.81776	-0.29025
Fcgr2b	t.test	0.204688	0.443688	10.2745	9.28388	1.44739	0.533457
Cd79a	t.test	0.206423	0.44616	3.07917	3.53605	0.670785	-0.576078
Klrb1	t.test	0.212145	0.45721	4.02899	4.42895	0.776718	-0.364537
Fcer1a	t.test	0.213984	0.458537	5.37659	5.74604	0.784866	-0.349481
Cxcl13	t.test	0.213511	0.458537	3.6421	3.63575	0.642049	-0.639246
Tlr3	t.test	0.221569	0.467957	6.00652	5.46271	1.19652	0.258848
Tie1	t.test	0.222748	0.467957	6.50909	6.20438	1.17979	0.238525
Ncr1	t.test	0.222505	0.467957	3.32623	3.65306	0.755958	-0.403622
Mpo	t.test	0.222001	0.467957	4.0474	3.59096	1.25	0.321924
Lamp3	t.test	0.220959	0.467957	3.65896	3.78869	0.756466	-0.402653
Dmbt1	t.test	0.221463	0.467957	3.00441	3.31325	0.73119	-0.451681
Cfi	t.test	0.222685	0.467957	4.60432	4.79857	0.680094	-0.556193
Mapk14	t.test	0.224739	0.470822	9.00346	8.88993	1.17964	0.238349
Tnfsf18	t.test	0.228129	0.473424	4.98394	5.2426	0.830111	-0.268623
Tlr6	t.test	0.228506	0.473424	4.83617	4.68257	1.22042	0.287377
Mill2	t.test	0.226837	0.473424	7.25537	6.82413	1.30218	0.380933
Cma1	t.test	0.228351	0.473424	8.28178	8.64303	0.806285	-0.310639
Ciita	t.test	0.229509	0.474193	5.13076	5.31325	0.798192	-0.325193
Ifitm2	t.test	0.231332	0.475117	10.956	11.1873	0.835993	-0.258436
Fcgr1	t.test	0.231777	0.475117	6.63319	6.3067	1.20323	0.266916
Alcam	wilcox.test	0.231857	0.475117	8.15859	7.75495	1.18132	0.240398
Itgam	t.test	0.233353	0.47688	7.20199	7.1205	1.17221	0.229236
Gzmk	t.test	0.234078	0.477062	3.57796	3.9644	0.708424	-0.497315
Tlr5	t.test	0.236138	0.479955	4.47961	5.01391	0.767935	-0.380943
Nlrc5	t.test	0.236977	0.480358	6.81623	6.96694	0.733817	-0.446509
Plaur	t.test	0.239196	0.483551	7.07564	7.2867	0.815764	-0.293777
Tek	t.test	0.24124	0.486372	5.57045	5.73444	0.869015	-0.202547
Rorc	t.test	0.244958	0.487536	5.45993	5.93805	0.713966	-0.486072
Hmgb1	t.test	0.246729	0.487536	9.42789	9.33842	1.07896	0.109641
Gzmm	t.test	0.245464	0.487536	3.08084	3.59096	0.747698	-0.419472
Clec4n	t.test	0.246427	0.487536	6.67031	6.80555	0.817219	-0.291206
Cdk1	t.test	0.245476	0.487536	3.85993	3.65306	1.1846	0.244397
Cd97	t.test	0.247668	0.487536	8.59531	8.4385	1.21525	0.281259
Cd200r1	t.test	0.246536	0.487536	5.47483	5.75087	0.790264	-0.339593
Ccl28	t.test	0.247311	0.487536	3.67491	3.95327	0.757031	-0.401577
C8a	t.test	0.244446	0.487536	3.04537	2.99095	0.709603	-0.494915
Tnf	t.test	0.253552	0.497811	4.46643	4.95327	0.835149	-0.259895
Stat3	t.test	0.254262	0.497902	9.36439	9.55468	0.846866	-0.239795
Ythdf2	t.test	0.256082	0.500161	8.14589	8.21645	0.957589	-0.0625222
Cd80	t.test	0.260489	0.507446	5.3856	5.06437	1.13072	0.17724
Thy1	t.test	0.266033	0.516238	10.1901	10.3877	0.833213	-0.263243
Ccr8	t.test	0.266379	0.516238	4.37561	4.68257	0.798709	-0.324258
Il12b	t.test	0.268139	0.518309	3.62417	3.9644	0.795364	-0.330314
Il13	t.test	0.269897	0.519977	4.07205	4.34837	0.732052	-0.449983
Ctsg	t.test	0.270388	0.519977	3.0167	3.31325	0.810548	-0.303031
Entpd1	t.test	0.271203	0.52021	7.03853	7.17981	0.893758	-0.162044
Cxcl11	t.test	0.272187	0.520766	4.12536	4.50144	0.767047	-0.382613
Cd40	t.test	0.277265	0.529132	4.57095	4.85798	0.851945	-0.231167
Irf5	t.test	0.27845	0.529277	7.03969	7.20682	0.886902	-0.173154
Il1b	t.test	0.278752	0.529277	5.29209	5.69014	0.786712	-0.346093
Lif	wilcox.test	0.280963	0.529454	5.67595	5.46271	1.33198	0.413575
Cd86	wilcox.test	0.280963	0.529454	6.06209	6.34074	0.831054	-0.266987
Atg7	wilcox.test	0.280963	0.529454	6.45718	6.37243	1.15364	0.20619
Oas3	t.test	0.283583	0.53305	4.52699	4.93829	0.803612	-0.315429
Chil3	t.test	0.2852	0.53475	5.91067	6.33503	0.532285	-0.90973
Tank	t.test	0.287316	0.536037	7.27103	7.49681	0.873933	-0.194405
Csf3	t.test	0.287181	0.536037	4.72822	4.9331	0.791537	-0.337272
Nfkbia	t.test	0.288402	0.536729	6.76194	6.98117	0.870407	-0.200238
Nfkb2	t.test	0.290244	0.538819	8.0877	8.04652	0.878546	-0.186811
Tgfb1	t.test	0.292952	0.542503	9.04485	9.29655	0.844573	-0.243706
Serping1	t.test	0.294623	0.542917	10.4718	10.6452	0.821564	-0.283555
Cd8b1	t.test	0.294212	0.542917	3.03106	3.42895	0.794041	-0.332714
Bmi1	t.test	0.295605	0.543392	7.12815	6.87061	1.21837	0.284955
Traf2	t.test	0.302339	0.553034	7.6009	7.49017	1.13008	0.176424
Hcst	t.test	0.302226	0.553034	3.78234	4.07895	0.78703	-0.345509
Cxcl12	t.test	0.3038	0.553034	9.51793	9.57973	1.1807	0.239648
Ccl12	t.test	0.303565	0.553034	5.54354	5.21839	1.39945	0.484864
Stat5b	t.test	0.307704	0.558785	7.76538	7.43546	1.10964	0.150091
Clec4a2	t.test	0.313588	0.568094	5.64206	5.93805	0.850488	-0.233638
Stat2	t.test	0.318023	0.574741	7.29551	7.01201	1.13648	0.184578
Ifih1	t.test	0.319446	0.575924	6.61773	6.65964	0.912516	-0.132077
Slamf1	t.test	0.322597	0.580211	3.59922	3.16189	1.26131	0.334927
Il3	t.test	0.323688	0.580781	3.69752	3.89821	0.822566	-0.281798
Gzmb	t.test	0.326617	0.584637	3.5167	3.86295	0.790901	-0.33843
F13a1	t.test	0.327407	0.584656	8.752	9.17981	0.83357	-0.262624
Itgal	t.test	0.328276	0.584815	5.32251	5.63546	0.836836	-0.256983
Cd180	t.test	0.329858	0.584855	6.44225	6.16993	1.12632	0.171614
Abcb1a	t.test	0.329691	0.584855	4.84401	5.09508	0.862457	-0.213475
Nfkb1	t.test	0.333992	0.589397	7.65142	7.66995	0.91154	-0.133622
Cd4	t.test	0.333946	0.589397	4.89289	4.7126	0.826034	-0.275727
Tnfrsf9	t.test	0.338041	0.593749	4.45337	4.81609	0.810057	-0.303904
Il1rapl2	t.test	0.337424	0.593749	3.52775	3.72901	0.817969	-0.289882
Tnfsf4	t.test	0.340794	0.597186	3.41997	3.69153	0.830283	-0.268325
Btla	t.test	0.344027	0.601445	4.20094	4.7126	0.821808	-0.283126
Epsti1	t.test	0.345759	0.603067	2.44807	3	0.740732	-0.432977
Cd53	t.test	0.34818	0.604762	4.76128	5	0.843972	-0.244733
Ccr1	t.test	0.348343	0.604762	6.79639	6.30889	1.2508	0.322854
Cd79b	t.test	0.349161	0.604783	3.85751	3.59096	1.18059	0.239504
Ubc	t.test	0.351331	0.606089	10.9506	11.0743	0.937582	-0.0929836
Tnfsf8	t.test	0.352451	0.606089	3.72323	3.83794	0.819204	-0.287705
Slc11a1	t.test	0.354238	0.606089	4.66756	4.51223	1.20199	0.26543
Kdr	t.test	0.354764	0.606089	6.48236	6.27668	1.08647	0.119651
Il11	t.test	0.354306	0.606089	3.26741	3.78869	0.798048	-0.325452
Blk	t.test	0.353544	0.606089	3.04002	3.25399	0.771399	-0.374451
Ceacam1	t.test	0.359621	0.61299	5.91217	5.87381	1.25062	0.32264
Csf2rb	t.test	0.361159	0.614217	6.69978	6.82668	0.843755	-0.245105
Mst1r	t.test	0.363195	0.615637	5.47913	5.76951	0.914254	-0.129333
Cd160	t.test	0.363636	0.615637	4.62746	4.86245	0.785312	-0.348662
Inpp5d	t.test	0.365637	0.61763	5.32509	5.46271	0.878069	-0.187593
Timd4	t.test	0.373036	0.624143	3.86399	4.10518	0.858098	-0.220786
Relb	t.test	0.37424	0.624143	6.97983	6.95082	0.89685	-0.157061
Nos2	t.test	0.373355	0.624143	4.25872	4.25323	0.768157	-0.380526
Nlrp3	t.test	0.371532	0.624143	4.54359	4.34056	1.29088	0.368354
Il10	t.test	0.373311	0.624143	3.86906	4.29572	0.8427	-0.246909
Ifi44	t.test	0.374486	0.624143	4.71691	4.95327	0.882382	-0.180525
Ecsit	t.test	0.376322	0.625812	5.65205	5.69042	0.950447	-0.0733226
Isg20	t.test	0.380932	0.626533	5.65532	5.73742	0.907549	-0.139952
Il22	t.test	0.379756	0.626533	3.99873	4.26454	0.86272	-0.213035
Ifngr1	t.test	0.37934	0.626533	9.22512	9.2533	0.923087	-0.115462
Colec12	t.test	0.380275	0.626533	8.23422	8.42333	0.846967	-0.239623
C1qa	t.test	0.379684	0.626533	9.64465	9.60017	1.13443	0.181962
Egfr	t.test	0.382019	0.626945	8.16724	8.31057	0.900506	-0.151193
F12	t.test	0.383389	0.627821	3.30818	3.62761	0.747586	-0.419688
Mr1	t.test	0.388406	0.630529	7.38039	7.44311	0.900362	-0.151423
Lamp1	t.test	0.38816	0.630529	11.2251	11.1002	1.05949	0.0833688
Ifnb1	t.test	0.386801	0.630529	3.1912	3.57531	0.765823	-0.384916
Cd8a	t.test	0.386365	0.630529	3.58727	3.81558	0.892377	-0.164275
Psmd7	t.test	0.390603	0.632727	9.69626	9.65048	1.07514	0.104523
Il15ra	t.test	0.394317	0.637365	4.53598	4.89869	0.886559	-0.173712
Irgm2	wilcox.test	0.396892	0.638775	6.43521	6.2363	1.22796	0.296258
Cmklr1	wilcox.test	0.396892	0.638775	7.86645	7.87387	0.898307	-0.15472
Mx2	t.test	0.397788	0.638846	5.06127	4.9331	1.15575	0.208828
Slc7a11	t.test	0.402339	0.6434	5.05264	5.42694	0.862259	-0.213807
Klra21	t.test	0.402263	0.6434	3.33836	3.62761	0.843417	-0.245682
Cd36	t.test	0.403397	0.643718	7.84595	8.57096	0.789211	-0.341518
Tdo2	t.test	0.406058	0.644544	3.5258	3.71039	0.850072	-0.234343
Msr1	t.test	0.406696	0.644544	5.65545	5.67948	0.910925	-0.134596
Ly9	t.test	0.408211	0.644544	5.09798	4.90737	1.19024	0.251251
H2.Q1	t.test	0.40738	0.644544	3.32971	4.06091	0.811715	-0.300955
Csf1	t.test	0.407583	0.644544	7.76668	7.66035	1.15163	0.203672
Il21	t.test	0.40941	0.645079	3.19036	3.72356	0.854569	-0.22673
Jak2	t.test	0.411598	0.647166	8.28048	8.25328	1.1031	0.14157
Prkcd	t.test	0.413964	0.649524	8.14562	8.35755	0.903078	-0.147077
Il12a	t.test	0.41556	0.650668	3.84359	4.64559	0.80009	-0.321766
Casp1	t.test	0.417463	0.652287	7.30289	7.3672	0.884071	-0.177765
Snai1	t.test	0.422855	0.657969	4.96919	5.31361	0.810234	-0.303589
Il7	t.test	0.422133	0.657969	4.07308	3.99095	0.845364	-0.242356
Clec7a	t.test	0.424022	0.658419	6.01171	6.47135	0.753494	-0.408332
Mbl2	t.test	0.424906	0.658429	3.51555	3.42895	1.17557	0.233359
Tlr4	t.test	0.430695	0.661929	6.74452	6.71397	1.13993	0.188947
Ptgdr2	t.test	0.429266	0.661929	4.65676	4.34837	1.18345	0.242998
Mefv	t.test	0.430543	0.661929	4.04707	3.95327	0.872097	-0.19744
Il17f	t.test	0.42947	0.661929	3.76859	4.07895	0.829323	-0.269993
Fcer2a	t.test	0.435151	0.667409	3.14709	3.12598	0.739401	-0.435572
Klra7	t.test	0.4386	0.667981	4.15046	4.24108	0.876446	-0.190264
Irak4	t.test	0.439066	0.667981	7.6358	7.52168	1.07544	0.104929
Fpr2	t.test	0.439977	0.667981	3.77191	3.79909	0.846864	-0.239797
Fasl	t.test	0.438438	0.667981	3.35422	3.57652	0.846297	-0.240764
Card9	t.test	0.43954	0.667981	4.05807	3.63575	1.25138	0.323514
Msln	t.test	0.442652	0.670685	3.52927	3.9542	0.809365	-0.305137
Itgb2	t.test	0.443831	0.671116	6.97085	7.03463	0.909622	-0.136661
Maf	t.test	0.451173	0.678911	6.97407	7.05105	1.0965	0.132908
Il17b	t.test	0.450754	0.678911	3.85751	3.89821	0.879098	-0.185905
Cxcr1	t.test	0.451702	0.678911	3.01185	3.42895	0.843724	-0.245158
Fos	t.test	0.455351	0.682955	8.79453	8.8926	1.23412	0.30348
Cd59b	t.test	0.456214	0.682955	5.23649	4.90737	1.14967	0.201214
Zbp1	wilcox.test	0.463403	0.684158	6.41748	6.17552	1.0819	0.113568
Thbs1	wilcox.test	0.463403	0.684158	8.66938	8.79468	0.934518	-0.0977053
Pla2g1b	t.test	0.459655	0.684158	3.10512	3.31325	0.807156	-0.30908
Igll1	wilcox.test	0.463403	0.684158	4.11907	3.9542	1.22867	0.297094
Cd83	wilcox.test	0.463403	0.684158	6.4846	6.51001	0.857062	-0.222529
Cd19	wilcox.test	0.463403	0.684158	3.91596	3.95327	0.785873	-0.347631
C9	t.test	0.460602	0.684158	4.60972	4.72846	0.852482	-0.230258
Pik3cd	t.test	0.46503	0.685211	6.70687	6.69014	1.11914	0.162394
Socs3	t.test	0.469925	0.689714	5.85294	5.65335	1.08883	0.122773
Casp8	t.test	0.469326	0.689714	7.7658	7.58504	1.06788	0.094753
Sell	t.test	0.472304	0.690503	5.78933	5.63546	1.16317	0.218068
C7	t.test	0.471699	0.690503	4.08495	3.85997	0.698097	-0.5185
Stat4	t.test	0.475808	0.693004	4.1047	3.97636	0.882929	-0.17963
Myd88	t.test	0.475863	0.693004	6.48711	6.78319	0.8941	-0.161492
Cr2	t.test	0.477968	0.69472	3.66799	3.89821	0.885167	-0.175978
Ticam2	t.test	0.482308	0.696036	5.44988	5.54566	0.916967	-0.125059
Ticam1	t.test	0.480628	0.696036	6.02336	5.77268	1.09669	0.133157
Cybb	t.test	0.482585	0.696036	7.09808	6.81609	1.15703	0.210426
Csf3r	t.test	0.481418	0.696036	4.75458	5.01391	0.900726	-0.15084
Cfh	t.test	0.489494	0.704647	8.64866	8.26454	1.14346	0.193404
Saa1	t.test	0.490889	0.7053	3.5433	3.7126	0.854335	-0.227126
Txk	t.test	0.492939	0.706891	3.97893	4.12598	0.884253	-0.17747
Tnfsf11	t.test	0.500415	0.710199	3.91748	4.42291	0.856701	-0.223136
Pdgfrb	t.test	0.500927	0.710199	7.49638	7.10507	1.16061	0.214885
Itk	t.test	0.496698	0.710199	4.25356	4.29572	0.889279	-0.169292
Il23a	t.test	0.500042	0.710199	3.69752	4.06091	0.901968	-0.148852
Cxcr5	t.test	0.497375	0.710199	2.58998	2.85	0.857878	-0.221156
Axl	t.test	0.49922	0.710199	9.20048	9.34543	0.899501	-0.152803
Nfatc4	t.test	0.502886	0.711631	6.07861	6.04854	0.914043	-0.129666
C8b	t.test	0.5054	0.713842	5.32872	5.66363	0.871586	-0.198285
Cd38	t.test	0.509004	0.71758	8.02856	7.57962	1.20925	0.274109
Il15	t.test	0.512197	0.720727	4.75172	4.63517	1.17902	0.237587
Stat1	t.test	0.515536	0.722714	6.47321	6.5932	0.911761	-0.133273
Cyld	t.test	0.514772	0.722714	7.34587	7.19505	1.07207	0.100403
Yy1	t.test	0.527103	0.734671	9.0356	8.98462	1.03673	0.0520441
Xcr1	wilcox.test	0.53582	0.734671	4.8041	4.78869	0.883538	-0.178635
Tmem173	t.test	0.534899	0.734671	6.00076	6.03474	1.08963	0.123843
Ms4a1	t.test	0.526708	0.734671	4.571	4.81609	0.870287	-0.200438
Mavs	wilcox.test	0.53582	0.734671	6.58549	6.46271	1.05052	0.0710981
Il9	wilcox.test	0.53582	0.734671	3.11338	3.12598	0.765513	-0.385501
Il4ra	t.test	0.53063	0.734671	7.87358	7.86709	1.09973	0.137152
Gbp5	wilcox.test	0.53582	0.734671	5.56841	5.2426	1.1328	0.179897
Fcer1g	t.test	0.526883	0.734671	7.44679	7.71548	0.929939	-0.104792
Cyfip2	wilcox.test	0.53582	0.734671	6.86453	6.5741	1.12574	0.17087
Cxcl1	wilcox.test	0.53582	0.734671	4.18732	4.51223	0.915014	-0.128134
Cd37	wilcox.test	0.53582	0.734671	6.50334	6.61603	0.964466	-0.0521982
Tlr8	t.test	0.537677	0.735872	6.3127	6.16108	1.09759	0.134344
Sh2b2	t.test	0.542698	0.740131	5.26144	5.31325	0.947605	-0.0776422
Hras	t.test	0.542762	0.740131	4.88947	4.63517	1.11052	0.151236
Ccl7	t.test	0.546952	0.74449	6.31019	6.3087	1.12236	0.166535
Cdh5	t.test	0.554793	0.753794	6.94639	6.66263	1.13189	0.178736
Oasl1	t.test	0.564106	0.758848	4.77825	4.85997	0.91335	-0.13076
Klra15	t.test	0.56709	0.758848	3.11338	2.95233	0.85956	-0.218329
Il2	t.test	0.567618	0.758848	4.00593	4.23879	0.907092	-0.14068
Ifna4	t.test	0.562988	0.758848	4.76171	4.85798	0.859805	-0.217918
Ifit1	t.test	0.566138	0.758848	5.61946	6.08619	0.888324	-0.170842
Dock9	t.test	0.564841	0.758848	8.15591	8.28318	0.916476	-0.125831
Cd46	t.test	0.565814	0.758848	3.21837	3.31325	1.19377	0.255528
Cd3eap	t.test	0.563449	0.758848	6.07796	6.13586	0.946119	-0.0799057
Ccl6	t.test	0.564904	0.758848	7.05576	7.33011	0.869329	-0.202025
Sh2d1b1	t.test	0.569523	0.76004	5.16591	5.42694	0.882371	-0.180543
Tnfsf10	t.test	0.576065	0.767405	4.79701	4.72846	0.897722	-0.155659
Cd68	t.test	0.57851	0.769295	8.25653	8.43425	0.933622	-0.0990892
Ctla4	t.test	0.580398	0.77044	6.99435	6.85325	1.06762	0.0944041
Mx1	t.test	0.589266	0.780829	3.46643	3.79909	0.889209	-0.169405
Bst2	t.test	0.594387	0.786227	8.08851	8.11411	1.06365	0.0890274
Mapk3	t.test	0.598007	0.786925	9.70496	9.71913	1.04311	0.060895
Ly86	t.test	0.596624	0.786925	7.34568	7.42702	1.10159	0.139585
Clec5a	t.test	0.598063	0.786925	4.46534	4.68986	0.909726	-0.136496
Pnma1	t.test	0.606828	0.794278	3.6473	3.53605	1.11138	0.152357
Egr3	t.test	0.604962	0.794278	7.28737	7.67115	0.891757	-0.165277
Cd70	t.test	0.606012	0.794278	4.45908	4.63575	0.895267	-0.15961
Vcam1	wilcox.test	0.612587	0.794934	6.13861	6.33771	1.05176	0.0728108
Tnfsf15	wilcox.test	0.612587	0.794934	4.18601	4.25323	0.793294	-0.334073
Tlr2	t.test	0.618988	0.794934	4.42666	4.58496	0.919529	-0.121032
Tcf7	t.test	0.613534	0.794934	6.6076	6.69014	0.936323	-0.094922
Pik3cg	t.test	0.618511	0.794934	5.78568	5.95373	0.92967	-0.105209
Map2k2	t.test	0.6187	0.794934	8.68817	8.71136	0.97594	-0.0351353
Klrc1	t.test	0.616732	0.794934	4.28595	4.48349	0.916412	-0.125932
Il17rb	t.test	0.613966	0.794934	4.93717	4.95327	1.12031	0.163901
Hc	t.test	0.61131	0.794934	4.67019	4.25323	1.14298	0.192799
Cd27	t.test	0.618252	0.794934	3.73347	3.9542	0.875563	-0.191717
Batf	t.test	0.617308	0.794934	5.02923	5.03122	0.917113	-0.124828
Tap2	t.test	0.620758	0.795844	6.88918	6.80555	1.07957	0.11045
Ccrl2	t.test	0.62344	0.797918	4.80866	4.7126	1.04432	0.0625605
Emr1	t.test	0.626211	0.800099	7.52246	7.72089	1.11266	0.154017
Mnx1	t.test	0.627574	0.800477	2.68703	2.72901	0.877717	-0.188172
Ebi3	t.test	0.629836	0.801999	4.13003	4.37226	0.931938	-0.101694
C5ar1	t.test	0.633838	0.805726	7.05943	7.07168	1.09677	0.13326
Lag3	t.test	0.636977	0.806386	5.25314	5.11145	1.06425	0.0898315
Ifng	t.test	0.636432	0.806386	4.15595	4.37226	0.886045	-0.174549
Cd28	t.test	0.637583	0.806386	4.49597	4.51475	0.894973	-0.160083
Ccl9	t.test	0.639793	0.80782	9.52109	9.5639	1.08124	0.112693
Klra4	t.test	0.643072	0.807943	4.30978	4.58496	0.891657	-0.165439
Irf1	t.test	0.643123	0.807943	8.02898	7.89379	1.06762	0.0943963
Cdkn1a	t.test	0.640994	0.807943	9.78065	9.87961	0.964986	-0.0514205
Il17a	t.test	0.647726	0.812365	3.79432	3.59096	0.886951	-0.173074
Cxcl15	t.test	0.658453	0.824441	3.12679	3.78346	0.870202	-0.200577
H2.Ob	t.test	0.663777	0.829722	5.48192	5.18468	0.910481	-0.135299
Foxj1	t.test	0.665101	0.829993	3.68422	3.57531	1.09196	0.126927
Sigirr	t.test	0.666345	0.830164	4.43462	4.62819	0.943381	-0.0840874
Syt17	t.test	0.668392	0.831333	4.37266	4.57592	0.922296	-0.116698
Mrc1	t.test	0.671256	0.833513	8.72836	9.0453	0.942734	-0.0850775
Irf7	t.test	0.679307	0.837961	5.77825	5.64126	0.94122	-0.0873966
Il27	t.test	0.679206	0.837961	3.85751	4.18824	0.903959	-0.14567
Ccl24	t.test	0.678938	0.837961	5.75553	5.65335	0.910704	-0.134945
C1s1	t.test	0.677567	0.837961	9.39958	9.22846	1.07543	0.104915
Ifna1	t.test	0.683821	0.842144	4.61769	4.59036	0.918725	-0.122295
Cd2	t.test	0.684965	0.84217	4.4022	4.12598	1.10736	0.147129
Cd1d2	t.test	0.689709	0.842478	4.61158	4.97636	0.916527	-0.125751
Casp3	t.test	0.689095	0.842478	7.64023	7.6627	1.02223	0.0317137
Angpt1	t.test	0.689177	0.842478	4.42159	4.24108	0.932489	-0.100842
Aire	t.test	0.689453	0.842478	4.91354	4.95327	0.937271	-0.093462
Tirap	wilcox.test	0.694328	0.842631	5.8744	5.69042	1.0342	0.0485187
Icosl	t.test	0.691605	0.842631	6.72836	6.92196	0.949089	-0.075385
Col1a1	t.test	0.693908	0.842631	13.9556	13.5872	1.10473	0.143697
C2	wilcox.test	0.694328	0.842631	7.65972	7.35129	1.01542	0.0220779
Dpp4	t.test	0.696356	0.843728	6.77449	7.0082	0.924355	-0.113481
Cd14	t.test	0.69806	0.844428	5.83226	6.06867	0.939254	-0.0904135
H60a	t.test	0.700472	0.84598	4.20335	4.34056	1.11606	0.158413
Aicda	t.test	0.704891	0.849949	4.17698	4.36807	0.911488	-0.133704
Tpsab1	t.test	0.710301	0.852192	4.66356	4.95327	0.91233	-0.132372
Tlr7	t.test	0.709315	0.852192	5.23109	5.42324	1.05422	0.076178
Il5	t.test	0.712384	0.852192	4.74112	5.01391	0.918498	-0.122651
Elane	t.test	0.71065	0.852192	3.5433	3.7126	0.913748	-0.130131
Btk	t.test	0.712433	0.852192	6.08369	6.27575	0.945257	-0.081221
Ptprc	t.test	0.718521	0.8571	7.65905	7.6393	1.05048	0.0710448
H2.Ea.ps	t.test	0.718821	0.8571	3.46063	3.42895	1.09599	0.132234
Usp18	t.test	0.719997	0.857139	5.27348	5.20085	0.958432	-0.0612522
Fcgr3	t.test	0.729685	0.867296	6.57885	6.69014	0.930235	-0.104333
Tbx21	t.test	0.736168	0.869489	5.00729	5.17552	0.941227	-0.0873848
Mapk11	t.test	0.732816	0.869489	5.22091	5.16229	1.04286	0.0605446
Ccr2	t.test	0.735176	0.869489	8.59468	8.6799	0.953587	-0.0685639
C3ar1	t.test	0.736159	0.869489	7.99165	7.90262	1.05214	0.0733251
Icam4	t.test	0.737345	0.86951	3.7847	3.95327	0.92545	-0.111773
Erbb2	t.test	0.741083	0.872547	8.57482	8.5741	1.03959	0.056015
Trem1	t.test	0.744998	0.873244	4.27851	4.57531	0.936585	-0.0945178
Psmb10	t.test	0.746421	0.873244	7.11917	7.14802	0.958546	-0.0610806
Klra1	t.test	0.747497	0.873244	3.28659	3.45022	0.899044	-0.153536
Il1r1	t.test	0.746055	0.873244	7.79637	7.80006	0.975106	-0.0363688
C1qb	t.test	0.746155	0.873244	9.3749	9.20105	1.04694	0.0661749
Mapkapk2	t.test	0.753212	0.877187	8.3011	8.49217	0.965731	-0.0503061
Litaf	t.test	0.753073	0.877187	8.58316	8.47667	0.958514	-0.0611293
Irak2	t.test	0.756647	0.87846	6.65957	6.52011	1.0384	0.0543675
Ido1	t.test	0.755913	0.87846	4.04897	4.58496	0.927212	-0.109028
Rela	t.test	0.764463	0.883346	7.7427	7.58037	1.0426	0.0601829
Jak3	t.test	0.766744	0.883346	6.09901	6.06415	0.963471	-0.0536864
Il10ra	t.test	0.762373	0.883346	5.77068	6.01391	1.05265	0.0740259
Gfi1	t.test	0.766701	0.883346	5.06268	4.89821	0.944666	-0.0821236
Creb1	t.test	0.763497	0.883346	8.1777	7.89718	1.04723	0.0665716
Osm	t.test	0.768744	0.884292	5.0797	5.23917	0.955868	-0.0651167
Il5ra	t.test	0.770599	0.885068	3.91902	3.79909	0.934724	-0.0973872
Mpped1	wilcox.test	0.778866	0.887987	3.35013	3.12598	0.952417	-0.0703343
Klra27	t.test	0.77906	0.887987	2.87509	3.34767	0.911592	-0.133539
Jun	wilcox.test	0.778866	0.887987	8.11646	8.29223	0.986658	-0.0193776
Glycam1	t.test	0.775568	0.887987	3.60502	3.45022	0.950827	-0.0727455
Fas	wilcox.test	0.778866	0.887987	6.35861	6.33771	0.949247	-0.0751445
Tnfsf13b	t.test	0.783815	0.889583	3.98996	4.12102	1.05893	0.0826133
Syk	t.test	0.784019	0.889583	6.28864	6.25323	1.03669	0.0519854
Il23r	t.test	0.784005	0.889583	3.69212	3.81558	0.952502	-0.0702063
Eomes	t.test	0.78753	0.891194	4.38143	4.2426	0.943987	-0.0831618
Cd40lg	t.test	0.787815	0.891194	4.3792	4.57531	0.931747	-0.10199
Gpr183	t.test	0.792882	0.895575	5.15435	5.31325	0.958013	-0.0618829
Sbno2	t.test	0.798123	0.899473	7.14932	7.25219	0.961279	-0.0569729
Klra5	t.test	0.798732	0.899473	4.55788	4.12598	1.06981	0.097358
Plau	t.test	0.800554	0.900173	8.33099	8.40484	1.03168	0.0449997
Klra17	t.test	0.803519	0.900806	4.47847	4.63575	0.954992	-0.06644
Col3a1	t.test	0.802445	0.900806	14.8103	14.7032	1.04109	0.0580922
A2m	t.test	0.807749	0.904197	4.12536	4.37226	0.938863	-0.0910139
Irf8	t.test	0.813176	0.908915	6.15007	6.03232	1.04386	0.0619234
Spp1	t.test	0.817111	0.910599	8.06562	8.58778	0.9194	-0.121236
Rag1	t.test	0.816406	0.910599	4.0085	3.95327	0.949478	-0.0747929
Ppbp	t.test	0.825437	0.917152	4.95118	5.08619	0.958827	-0.0606577
Il25	t.test	0.824682	0.917152	4.16091	4.17153	0.958177	-0.0616352
Usp9y	t.test	0.833036	0.923601	3.3124	3.31325	0.955683	-0.0653965
App	t.test	0.833704	0.923601	11.481	11.527	0.979378	-0.0300629
Ms4a2	t.test	0.838665	0.927727	5.05009	4.65363	1.04497	0.0634554
Rsad2	t.test	0.841297	0.927901	5.52246	5.34518	0.969274	-0.045024
Klra20	t.test	0.840446	0.927901	4.09462	4.12102	1.04159	0.0587854
Ifna2	t.test	0.842613	0.927987	3.95453	3.78869	1.04367	0.061667
Ltk	t.test	0.848953	0.931693	4.63815	4.68257	1.03301	0.0468534
Cd34	t.test	0.849704	0.931693	9.51278	9.62897	1.04176	0.0590177
Cd22	t.test	0.847295	0.931693	4.42788	4.12102	1.0403	0.0569945
Tlr9	t.test	0.855196	0.93479	5.55067	5.78319	0.962907	-0.054532
Lilra5	t.test	0.856268	0.93479	4.13315	4.2426	0.965517	-0.0506258
Cx3cl1	t.test	0.853966	0.93479	4.81571	4.76022	1.02931	0.0416729
Txnip	t.test	0.868465	0.935692	9.63236	9.51069	0.981235	-0.0273296
Tnfrsf1a	wilcox.test	0.866511	0.935692	9.75401	9.80789	0.910752	-0.13487
Tnfrsf13c	t.test	0.866409	0.935692	4.00593	3.83794	0.961825	-0.0561531
Tfe3	t.test	0.864509	0.935692	6.86343	6.92434	0.982517	-0.0254457
Nfatc1	t.test	0.86957	0.935692	6.63696	6.56301	1.0184	0.0263018
Mmp9	t.test	0.868621	0.935692	5.52165	5.75007	1.03663	0.0519053
Isg15	wilcox.test	0.866511	0.935692	5.8882	5.95303	1.06705	0.0936265
Il1rl1	t.test	0.862086	0.935692	5.90429	6.17552	1.03406	0.0483246
Gzma	t.test	0.863	0.935692	5.03363	4.97636	0.968206	-0.0466143
Cd96	wilcox.test	0.866511	0.935692	3.79441	3.54102	1.18655	0.246769
Cxcl5	t.test	0.873763	0.938857	4.70155	4.34837	1.03911	0.0553464
Tnfrsf17	t.test	0.877852	0.941902	4.11335	4.36807	0.979112	-0.0304536
Tnfsf14	t.test	0.880612	0.943513	5.24424	5.3067	1.03155	0.0448088
Ambp	t.test	0.883165	0.944898	4.10637	4.16027	0.966808	-0.0486988
Pvrl2	t.test	0.884473	0.94495	7.22282	7.36816	1.01963	0.0280526
Tal1	t.test	0.88865	0.948062	4.60144	4.44758	1.02316	0.0330381
Ikzf1	t.test	0.892012	0.950297	5.03912	5.15543	0.978842	-0.0308517
Gbp2b	t.test	0.893809	0.950861	4.22364	3.9542	0.981445	-0.02702
Pecam1	t.test	0.896049	0.951124	7.47024	7.73424	0.978059	-0.0320069
Map2k1	t.test	0.896593	0.951124	8.88503	8.8227	1.01351	0.0193573
Ncf4	t.test	0.8986	0.951906	6.71939	6.64947	1.01657	0.0237044
Smad4	t.test	0.904669	0.953223	8.80801	8.84235	1.01199	0.0171895
Cd84	t.test	0.9024	0.953223	7.07214	7.02148	0.980972	-0.0277164
Ccr5	t.test	0.902789	0.953223	5.33912	5.46271	1.01735	0.0248213
C8g	t.test	0.904927	0.953223	4.3297	4.31325	0.975311	-0.0360658
Tnfrsf13b	t.test	0.908814	0.955975	4.32181	4.34056	1.02679	0.0381378
Gpr44	t.test	0.91447	0.960577	4.99385	5.0505	0.979045	-0.0305527
Masp2	t.test	0.921446	0.965202	3.33391	3.43429	0.977451	-0.0329034
Atg5	t.test	0.920209	0.965202	6.00772	5.92196	1.00712	0.0102356
Pmch	t.test	0.924614	0.96717	3.33757	3.57652	0.965592	-0.050515
Vim	t.test	0.936378	0.973596	12.1681	12.2383	0.990888	-0.0132057
Vegfa	t.test	0.937955	0.973596	7.11427	7.0607	0.988287	-0.016998
Nt5e	t.test	0.938547	0.973596	7.15413	7.24108	0.99272	-0.0105418
Kit	t.test	0.932285	0.973596	5.77818	5.76049	1.01074	0.015414
Crp	t.test	0.935934	0.973596	3.80863	3.83794	1.01271	0.0182199
Ccl26	t.test	0.934286	0.973596	3.69091	3.7126	1.01682	0.0240637
Fcgr4	t.test	0.940874	0.974663	5.05329	5.11145	1.02188	0.0312284
Zap70	t.test	0.954711	0.975909	4.17042	3.99095	0.989056	-0.0158755
Tnfrsf11a	t.test	0.950791	0.975909	5.65285	5.71918	0.990719	-0.0134523
Tnfrsf10b	wilcox.test	0.955089	0.975909	5.65444	5.59066	0.89338	-0.162654
Klra6	wilcox.test	0.955089	0.975909	4.59361	4.58676	1.17321	0.230457
Il21r	wilcox.test	0.955089	0.975909	4.86115	5.22033	1.13375	0.181102
Icam2	t.test	0.950056	0.975909	5.24907	5.26416	0.991873	-0.0117733
Hamp	wilcox.test	0.955089	0.975909	4.3457	4.29572	0.939165	-0.0905488
H2.Q2	t.test	0.952816	0.975909	4.61222	4.48349	1.01368	0.0196036
Cxcl9	wilcox.test	0.955089	0.975909	5.3177	5.3067	0.957387	-0.0628264
Csf1r	wilcox.test	0.955089	0.975909	9.49638	9.55155	1.04723	0.0665777
Irf4	t.test	0.960554	0.980157	4.76699	4.83845	1.00813	0.0116758
Vhl	t.test	0.971433	0.980586	6.43875	6.48204	1.0064	0.00919958
Thbd	t.test	0.970467	0.980586	8.51069	8.80277	1.00867	0.0124574
Pycard	t.test	0.967576	0.980586	5.20035	5.29756	1.0048	0.00690473
Pax5	t.test	0.967044	0.980586	4.43494	4.63575	1.00701	0.010076
Ltf	t.test	0.962679	0.980586	4.28618	4.37226	1.00962	0.0138166
Klrg1	t.test	0.965256	0.980586	4.12679	4.2426	0.987197	-0.0185908
Herc6	t.test	0.96532	0.980586	5.29832	5.21839	0.993144	-0.0099257
H2.Q10	t.test	0.969001	0.980586	5.10705	5.20085	0.995571	-0.00640392
Pou2af1	t.test	0.9826	0.990524	3.26068	3.57531	1.00642	0.00922754
H2.M3	t.test	0.986474	0.992118	6.88651	6.69014	0.997477	-0.00364418
Cd274	t.test	0.986827	0.992118	6.22645	6.13586	1.00386	0.00555518
Il4	t.test	0.989687	0.993662	3.70863	3.7126	1.00266	0.00382775
Camp	t.test	0.991712	0.994364	3.86638	3.79909	0.997853	-0.00310024
Muc1	t.test	0.996915	0.998129	4.7246	4.78869	1.00065	0.000933533
Itga2b	t.test	0.998129	0.998129	4.68373	4.64559	1.00055	0.000789498
